# Supplementary material for: HIV prevalence and factors associated with HIV infection among transgender women in Cambodia: results from a national Integrated Biological and Behavioral Survey
Source: PubMed Central journal article supplement — BMJ Open. 2017 Aug 11;7(8):e015390. doi: 10.1136/bmjopen-2016-015390 (PMC5724216; doi:10.1136/bmjopen-2016-015390), 2017-08-11
Supplement: bmjopen-2016-015390.draft_revisions.pdf [file bmjopen-2016-015390.draft_revisions.pdf]

# BMJ Open

## Factors associated with HIV infection among transgender women in Cambodia: Results from a national integrated biological and behavioral survey

|                                 |                                                                                                                                                                                                                                                                                                                                                                                                                                                                                                                                                                                                           |
|---------------------------------|-----------------------------------------------------------------------------------------------------------------------------------------------------------------------------------------------------------------------------------------------------------------------------------------------------------------------------------------------------------------------------------------------------------------------------------------------------------------------------------------------------------------------------------------------------------------------------------------------------------|
| Journal:                        | <i>BMJ Open</i>                                                                                                                                                                                                                                                                                                                                                                                                                                                                                                                                                                                           |
| Manuscript ID                   | bmjopen-2016-015390                                                                                                                                                                                                                                                                                                                                                                                                                                                                                                                                                                                       |
| Article Type:                   | Research                                                                                                                                                                                                                                                                                                                                                                                                                                                                                                                                                                                                  |
| Date Submitted by the Author:   | 02-Dec-2016                                                                                                                                                                                                                                                                                                                                                                                                                                                                                                                                                                                               |
| Complete List of Authors:       | Chhim, Srean; FHI 360 Cambodia<br>Ngin, Chanrith; KHANA Center for Population Health Research<br>Chhoun, Pheak; KHANA Center for Population Health Research<br>Tuot, Sovannary; KHANA Center for Population Health Research<br>Ly, Cheaty; Population Services Khmer (PSK)<br>Mun, Phalkun; National Center for HIV/AIDS, Dermatology and STD (NCHADS)<br>Pal, Dyla; KHANA Center for Population Health Research<br>Macom, John; FHI 360<br>Dousset, Jean-Philippe ; FHI 360<br>Mburu, Gitau; Lancaster University, Division of Health Research<br>Yi, Siyan; KHANA Center for Population Health Research |
| <b>Primary Subject Heading</b>: | HIV/AIDS                                                                                                                                                                                                                                                                                                                                                                                                                                                                                                                                                                                                  |
| Secondary Subject Heading:      | Infectious diseases, Epidemiology, Public health                                                                                                                                                                                                                                                                                                                                                                                                                                                                                                                                                          |
| Keywords:                       | Transgender women, HIV infection, Risk factors, Prevention, Integrated Biological and Behavioral Survey, Cambodia                                                                                                                                                                                                                                                                                                                                                                                                                                                                                         |
|                                 |                                                                                                                                                                                                                                                                                                                                                                                                                                                                                                                                                                                                           |

SCHOLARONE™  
Manuscripts

1  
2  
3 1 **Factors associated with HIV infection among transgender women in Cambodia: Results from a**  
4 **national integrated biological and behavioral survey**  
5  
6

7  
8  
9 4 Chhim Srean,<sup>1</sup> Chanrith Ngin,<sup>2</sup> Pheak Chhoun,<sup>2</sup> Sovannary Tuot,<sup>2</sup> Cheaty Ly,<sup>3</sup> Phalkun Mun,<sup>4</sup>  
10 5 Khuondyla Pal<sup>2</sup>, John Macom<sup>5</sup>, Jean-Philippe Dousset<sup>1</sup>, Gitau Mburu<sup>6</sup>, Siyan Yi<sup>2,\*</sup>  
11  
12

13  
14 6  
15 7 <sup>1</sup> FHI 360, Phnom Penh, Cambodia

16 8 <sup>2</sup> KHANA Center for Population Health Research, Phnom Penh, Cambodia

17 9 <sup>3</sup> Population Services Khmer (PSK), Phnom Penh, Cambodia

18 10 <sup>4</sup> National Center for HIV/AIDS, Dermatology and STD (NCHADS), Phnom Penh, Cambodia

19 11 <sup>5</sup> FHI 360 Asia Pacific Regional Office, Bangkok, Thailand

20 12 <sup>6</sup> Division of Health Research, Lancaster University, Lancaster, UK  
21  
22

23  
24 13  
25 14 \* Correspondence to: Siyan Yi, No. 33, Street 71, Tonle Bassac, Chamkar Mon, Phnom Penh,  
26 15 Cambodia Tel: +855-23-211-505 / Fax: +855-23-214-049 / Email: [siyan@doctor.com](mailto:siyan@doctor.com)  
27  
28

29  
30 16  
31 17 **Word count: 4,517**  
32  
33  
34  
35  
36  
37  
38  
39  
40  
41  
42  
43  
44  
45  
46  
47  
48  
49  
50  
51  
52  
53  
54  
55  
56  
57  
58  
59  
60

1  
2  
3 30 **ABSTRACT**

4  
5 31 **Objective:** To examine factors associated with HIV infection among transgender women in  
6  
7 32 Cambodia.

8  
9 33 **Design:** Cross-sectional study

10  
11 34 **Settings:** Thirteen HIV high-burden city and provinces

12  
13 35 **Participants:** This study included 1,375 sexually active transgender women with a mean age of  
14  
15 36 participants was 25.9 years (SD= 7.1) recruited by using respondent driven sampling for struc-  
16  
17 37 tured questionnaire interviews and rapid finger-prick HIV testing.

18  
19 38 **Primary outcome measure:** HIV infection detected by using Determine™ antibody test.

20  
21 39 **Results:** The overall HIV prevalence among this population was 5.9%. In multivariate logistic re-  
22  
23 40 gression, participants living in urban areas were twice as likely to be HIV infected as those living  
24  
25 41 in rural areas. Participants with primary education were 1.7 times as likely to be infected com-  
26  
27 42 pared to those with high school education (AOR=1.7, 95% CI= 1.0-2.9). HIV infection increased  
28  
29 43 with age; compared to those aged 18-24, the odds of being HIV infected were twice among  
30  
31 44 transgender women aged 25-34 and 2.8 times higher among those aged  $\geq 35$ . Self-injection of  
32  
33 45 gender affirming hormones was associated with a fourfold increase in the odds of HIV infection.  
34  
35 46 A history of genital sores over the previous 12 months increased the odds of HIV infection by  
36  
37 47 threefold. Transgender women with stronger feminine identity dressing up as a woman all the  
38  
39 48 time were twice as likely to be HIV infected compared to those who did not dress up as a wom-  
40  
41 49 an all the time. Having never used online services developed for transgender women was also  
42  
43 50 associated with higher odds of being HIV infected.

44  
45 51 **Conclusions :** Transgender women in Cambodia are at high risk of HIV. To achieve the goal of  
46  
47 52 eliminating HIV in the country, effective combination prevention strategies focusing on the  
48  
49 53 above risk factors among transgender women are urgently needed.

50  
51 54  
52 55 **Keywords:** Transgender women, HIV infection, Risk factors, Prevention, Integrated Biological  
53  
54 56 and Behavioral Survey, Cambodia

55  
56 57

57  
58 58

59  
60 59

60  
61 60

1  
2  
3 59 **Strengths and limitations of this study**  
4  
5 60  
6

- 7 61     ▪ This is the second Integrated Biological and Behavioral Survey (IBBS) that examined fac-  
8            tors associated with HIV infection among transgender women—one of the most vulner-  
9 62            able populations in Cambodia.  
10 63  
11 64     ▪ This study covered 13 study sites (seven greater than the coverage of the first IBBS),  
12            thus providing more valid and comprehensive results.  
13 65  
14 66     ▪ This study provides useful data for identifying risk factors for HIV infection and ways in  
15            which services and policies can be tailored to reduce HIV infection among this key popu-  
16 67            lation.  
17 68  
18 69     ▪ Limitations of the study included the representativeness of the study sample, the poten-  
19            tial bias in participant recruitment, the validity of self-reported measures, and the cross-  
20 70            sectional nature of the data.  
21 71  
22 72  
23 73  
24 74  
25  
26  
27  
28  
29  
30  
31  
32  
33  
34  
35  
36  
37  
38  
39  
40  
41  
42  
43  
44  
45  
46  
47  
48  
49  
50  
51  
52  
53  
54  
55  
56  
57  
58  
59  
60

## 75 INTRODUCTION

76 Globally, transgender women are at high risk for HIV infection, and little is known about the  
77 burden of HIV infection and its related factors in this population. A 2013 systematic review  
78 demonstrated a global HIV prevalence among transgender women of 19%, with 18% in low-  
79 and middle-income countries and 22% in high-income countries.<sup>1</sup> The probability of being in-  
80 fected with HIV among transgender women was approximately 49 times higher than among the  
81 general adult population.<sup>1</sup> Epidemiologically, transgender women share some HIV risk factors  
82 with other populations, such as ulcerative sexually transmitted infections (STIs),<sup>2,3</sup> multiple sub-  
83 stance use, victimization, intimate partner violence,<sup>4</sup> unprotected sex,<sup>5</sup> multiple sex partners,<sup>6</sup>  
84 and injecting drug use.<sup>5-7</sup>

85 However, transgender women encounter additional and unique biological, social, cul-  
86 tural, legal, and economic issues, which increase their vulnerability to HIV. Transgender women  
87 are marginalized legally and economically through discriminative legislation and practice, which  
88 accelerates their vulnerability to HIV infection by confining their job options to sex work. Sex  
89 work in turn exacerbates their stigmatization and alienation,<sup>8</sup> and further increases their HIV  
90 risk.<sup>9,10</sup> Stigmatization and discrimination further increase the risk of HIV infection by prevent-  
91 ing transgender women from seeking essential health information and services.<sup>11</sup> Depression  
92 and poor self-esteem, the major psychosocial consequences of stigma, further weaken the bar-  
93 gaining power for safer sex in sexual relationships, resulting in low condom use.<sup>5, 12-15</sup>  
94 Transgender women who have sex with men often engage in receptive anal intercourse, which  
95 increases their risk of HIV acquisition, compared to insertive sexual partners.<sup>2</sup> Syndemics of illic-  
96 it drug use, abuse by family members, and mental health often occur together;<sup>16</sup> and are often  
97 associated with less likelihood of transgender women to use condoms during sex with commer-  
98 cial partners.<sup>17</sup> In addition, the confluence of arbitrary arrests,<sup>18,19</sup> violence,<sup>16,20</sup> economic pres-  
99 sures,<sup>21</sup> and other social problems further aggravate mental health risks among transgender  
100 women, causing them to engage in risky sexual behaviors.<sup>6,17</sup>

101 In Southeast Asia, systematic reviews of studies in Indonesia, Thailand, and Vietnam  
102 demonstrated that transgender women were particularly at high HIV risk, with estimated  
103 prevalence of 26.1%, 12.2%, and 6.7%, respectively.<sup>1</sup> In Cambodia, up to 2012, transgender

1  
2  
3 104 women were traditionally included in HIV prevention programs targeting men who have sex  
4 with men (MSM). As a result, their unique needs were not reflected in the programs' goals.<sup>22</sup>  
5 105  
6  
7 106 There was also a lack of transgender women-specific data to quantify the number reached by  
8 outreach programs and services. In 2012, the first Integrated Biological and Behavioral Survey  
9 107  
10 108 (IBBS) that specifically included transgender women in Cambodia found a HIV prevalence of  
11 4.2% among this population,<sup>22</sup> which was six times higher than the 0.7% among the general  
12 109  
13 110 adult population aged 15-45,<sup>23</sup> and about twice higher than the 2.1% among MSM.<sup>24</sup> This 2012  
14 study also found that older age (>35 years), residence in Siem Reap province (a major tourist  
15 111  
16 112 site), having sex during or after drug use, not using condoms during the last anal sex, and low  
17 self-esteem were associated with HIV infection among transgender women.<sup>22</sup>  
18 113  
19  
20  
21

22 114 Recognizing the differences in HIV vulnerability and prevention needs between  
23 transgender women and MSM, in 2013 the National Center for HIV/AIDS, Dermatology and STD  
24 115  
25 (NCHADS) separated these two populations in its revised Standard Operating Procedure (SOP)  
26 116  
27 known as Boosted Continuum of Prevention, Care and Treatment (B-CoPCT).<sup>22 25</sup> Transgender  
28 117  
29 women have since been considered a distinct at-risk group in HIV surveillance and programs.  
30 118  
31 119 The National B-CoPCT approach aims to increase the uptake of HIV testing and counseling (HTC)  
32 and other related services, ensure the quality of outreach, and strengthen service delivery to  
33 120  
34 meet specific needs of most-at-risk key populations, including transgender women, in-order to  
35 121  
36 achieve Cambodia's 3.0 goal (i.e. zero new HIV infection, zero discrimination, and zero AIDS-  
37 122  
38 related deaths) by 2020.  
39 123

40  
41 124 Three years following the first IBBS in 2012,<sup>22</sup> the TGIBBS-2016 was conducted between  
42 December 2015 and February 2016 to identify factors associated with HIV infection among  
43 125  
44 transgender women in Cambodia and ways in which services and policies can be tailored for  
45 126  
46 this key population.  
47 127  
48

49 128

## 50 129 **METHODS**

### 51 130 **Study sites**

52 131 Data collection was conducted in the capital city of Phnom Penh and 12 provinces including  
53  
54 132 Battambang, Banteay Meanchey, Kampong Cham, Kandal, Koh Kong, Kampong Chhnang, Kam-  
55  
56  
57  
58  
59  
60

133 pong Speu, Prey Veng, Preah Sihanouk, Siem Reap, Svay Rieng, and Tbong Khmum. These sites  
 134 were purposively selected, for they were within the 23 HIV high-burden operational districts  
 135 identified by NCHADS.<sup>26 27</sup>

136

### 137 **Sample size and sampling procedures**

138 The sample size estimate was determined for the purpose of surveillance to track the change in  
 139 the epidemic over time. The minimum sample size required for this study was 1,380, with suffi-  
 140 cient power to detect significant differences between the following null and alternative hy-  
 141 potheses. The hypothesis test was that of one-sample proportion in comparison to the null hy-  
 142 pothesis.

143 The null hypothesis ( $H_0$ ): HIV prevalence among transgender women was 4.2%. The al-  
 144 ternative hypothesis ( $H_a$ ): HIV prevalence among transgender women will decrease by 1.2%.  
 145 The sample size was calculated using the following formula and assumptions:

$$n = \frac{p_0 q_0 \left( z_{1-\alpha} + z_{1-\beta} \sqrt{p_1 q_1 / p_0 q_0} \right)^2}{(p_1 - p_0)^2}$$

146

- 147 ▪  $P_0$  = estimated proportion in  $H_0$  (In the most recent survey, HIV prevalence among TG  
 148 women was 4.2% in 2012.)
- 149 ▪  $P_1$  = estimated proportion in  $H_a$  (The expected HIV prevalence among TG women in the  
 150 current study is about 3.0 %)
- 151 ▪  $Z_{(1-\alpha)}$  = significance level at 5% in response to one-sided test (Z score = 1.645)
- 152 ▪  $Z_{(1-\beta)}$  = power level of 80% (Z score = 0.83)
- 153 ▪ Refusal rate of 10%
- 154 ▪ Design effect is assumed to be one.

155

156 This sample size was stratified by the study sites. Roughly half of the estimated transgender  
 157 women in all but five sites were successfully recruited. In five study sites where the estimated  
 158 number of transgender women was smaller than 100, all transgender women were recruited.  
 159 The total estimated sample size was 1,368.

1  
2  
3 160 Individuals were included in the study if they: (1) were biologically male at birth and  
4  
5 161 self-identified as a woman or third gender, (2) were Khmer-speaking, (3) were at least 18 years  
6  
7 162 old at the time of screening, (4) reported having sex with at least one man in the past 12  
8  
9 163 months, and (5) were able and willing to provide an informed consent.

10 164 Among the 13 study sites, participant recruitment was conducted in 20 locations (six lo-  
11  
12 165 cations in Phnom Penh and 14 locations in the other provinces). The number of the selected  
13  
14 166 locations was determined based on the proportion of the required sample size in each study  
15  
16 167 site. Participants were recruited through a Respondent Driven Sampling (RDS) method. First,  
17  
18 168 four “seeds” (two seeds aged 18 to 24 and the other two seeds aged 25 or older) who were well  
19  
20 169 connected to other transgender women in each location were selected by outreach workers  
21  
22 170 working for the implementing partners (local NGOs) based in the selected locations. These  
23  
24 171 seeds had to meet the above-mentioned eligibility criteria for participation and have an  
25  
26 172 established and large social network comprising about 10 or more other transgender women in  
27  
28 173 their given location. Eligibility to participate as a seed was determined by the leader of data  
29  
30 174 collection team using a paper-based eligibility form.

31 175 Second, each seed was given a personal identity number (PIN) and enrolled in the study.  
32  
33 176 Third, each seed was given three coupons and asked to refer three additional transgender  
34  
35 177 women. US\$2 was given to each seed for a successful referral. Each seed was expected to ex-  
36  
37 178 tend to three to six “recruitment waves” in each site. If the initial seeds did not recruit  
38  
39 179 participants, or if enrollment was halted because all recruitment chains had “dried up” (i.e.  
40  
41 180 stopped recruiting), additional seeds would be selected. In total, 80 seeds were selected by the  
42  
43 181 outreach workers, and a total of 1,375 transgender women were enrolled in the study. Referred  
44  
45 182 participants were initially screened by the data collectors for eligibility.

46  
47 183

#### 48 184 **Data collection training and procedures**

49 185 Data were collected by three teams; each team comprised of one field supervisor, five inter-  
50  
51 186 viewers, one lab technician, and one counselor. Lab technicians and counselors were from the  
52  
53 187 Municipal or Provincial AIDS and STI Program of the study sites. These data collection teams  
54  
55  
56  
57  
58  
59  
60



1  
2  
3 188 were trained for three days on study protocol, research ethics, interview techniques, and data  
4  
5 189 collection procedures provided by the principle investigators and research coordinators.  
6

7 190 To determine HIV prevalence, all participants received onsite rapid finger-prick testing.  
8  
9 191 Pre-test counseling was provided by qualified, trained counselors working for volunteer confi-  
10  
11 192 dential and counseling testing (VCCT) centers. Participants could receive their HIV-test result  
12  
13 193 verbally after the questionnaire interview. Blood samples were obtained from each participant  
14  
15 194 by trained lab technicians through finger-prick and tested for HIV using Determine™ test, in  
16  
17 195 keeping with the national protocol.<sup>28</sup> Post-test counseling was provided for each participant  
18  
19 196 regardless of their HIV test result by the same counselor who conducted the pre-test counseling  
20  
21 197 in accordance with NCHADS HIV testing guidelines.<sup>28</sup> Participants who were HIV reactive and  
22  
23 198 did not know their HIV status were referred by the counselor for confirmatory testing at the  
24  
25 199 nearest VCCT center. The quality of HIV tests was monitored using quality control samples. Dis-  
26  
27 200 cordant results between the screening and confirmatory tests were investigated to elucidate  
28  
29 201 potential causes and minimize potential erroneous results. In the case of human error, individ-  
30  
31 202 uals performing screening tests were retrained before resuming their involvement in the study.

32 203 After HIV testing, the participants were interviewed by the trained interviewers using a  
33  
34 204 computer-assisted survey instrument (CASI). The questionnaire was set up in Qualtrics, a web-  
35  
36 205 based application, and run on an Android tablet. HIV testing and interviews were conducted in  
37  
38 206 the selected 20 locations including drop-in centers, private houses, and private offices of im-  
39  
40 207 plementing partners, depending on the participants' convenience.  
41

42 208

### 43 209 **Questionnaire development and measures**

44 210 The questionnaire was developed using standardized and validated tools adapted from TGIBBS-  
45  
46 211 2012,<sup>22</sup> FHI 360's guideline for Behavioral Surveillance Survey (BSS),<sup>29</sup> and NCHADS's Boosted-  
47  
48 212 CoPCT<sup>25</sup> to measure key variables related to the objectives of the study. The questionnaire was  
49  
50 213 initially drafted in English and translated into Khmer, the national language of Cambodia. Con-  
51  
52 214 sultative meetings to improve the draft questionnaire were held with representatives of  
53  
54 215 transgender women, communities, and NGOs working with transgender women, as well as re-  
55  
56  
57  
58  
59  
60

1  
2  
3 216 searchers and practitioners working on HIV and AIDS in Cambodia. The questionnaire was pre-  
4  
5 217 tested with 20 transgender women in Phnom Penh and finalized based on findings.  
6

7 218 The questionnaire collected information on socio-economic characteristics, transgender  
8  
9 219 identity and related experiences, sexual behaviors and condom use with different types of sex-  
10  
11 220 ual partners, HIV/STI screening and care seeking behaviors, substance use, and exposure to HIV  
12  
13 221 programs. For details of the questionnaire, please see Supplementary File 1.  
14

15 222

### 16 223 **Data analyses**

17 224 HIV prevalence was calculated by dividing the total number of participants with HIV reactive  
18  
19 225 test results with the total number of participants. To examine the associated factors of HIV in-  
20  
21 226 fection, we conducted both bivariate and multivariate analyses. In the bivariate analyses, we  
22  
23 227 compared all characteristics and behavioral variables among participants with a reactive result  
24  
25 228 to those among participants with a non-reactive test result. Chi-square test or Fisher's exact  
26  
27 229 test (for an expected cell value  $\leq 5$ ) was used for categorical variables and Student's *t*-test was  
28  
29 230 used for continuous variables. To facilitate the model, some continuous variables, such as age  
30  
31 231 were transformed to categorical variables. A multivariate logistic regression model was con-  
32  
33 232 structed to examine independent factors associated with HIV infection. Variables with a signifi-  
34  
35 233 cance level of  $p < 0.05$  in the bivariate analyses were simultaneously included in the model.  
36  
37 234 Backward elimination method was used to eliminate variables with the highest  $p$ -value one-by-  
38  
39 235 one from the model. STATA Version 12.0 for Windows (Stata Corp, TX, USA) was used to con-  
40  
41 236 duct the data analyses.  
42

43 237

### 44 238 **ETHICAL STATEMENT**

45 239 Participation in this study was voluntary, and a written informed consent was obtained from  
46  
47 240 each study participant after a detailed description of the study objective and procedures was  
48  
49 241 explained to them. Participants were informed that they could stop responding to questions  
50  
51 242 and discontinue their participation at any time. Interviews were conducted at a private place,  
52  
53 243 and confidentiality was enhanced by assigning a PIN to each participant. No personal identifiers  
54  
55 244 were contained in the questionnaires or dataset. The study protocol was approved by FHI 360's  
56  
57  
58  
59  
60

245 Protection of Human Subjects Committee (PHSC No. 713897) and the National Ethics Commit-  
246 tee for Health Research (NECHR) of the Ministry of Health, Cambodia (No. 420 NECHR).

247

## 248 RESULTS

### 249 HIV prevalence

250 Of 1,375 participants tested, 81 (5.9%) had an HIV reactive test; of whom, 42 (52%) were not  
251 aware of their HIV status prior to the study. Out of the 39 cases who already knew their status,  
252 37 (94.9%) were on treatment, and two of them reported dropping the treatment.

253

### 254 Socio-demographic characteristics

255 As shown in Table 1, the majority of the participants (83.4%) were recruited from urban com-  
256 munities; 53.0% were younger than 25 years old; and 97.2% were never married. More than  
257 two-thirds of the participants (68.6%) had completed high school, and 9.1% had higher educa-  
258 tion. The most common main occupations reported by the participants were hair dress-  
259 ers/beauticians (35.1%), laborers/farmers (17.5%), and entertainment workers (14.8%). More  
260 than one-third of the participants (38.6%) reported their average monthly income in the past  
261 six months of US\$ 100-199, while 16.5% reported it to be more than US\$ 300. Regarding gender  
262 identity, 42.2% identified themselves as female, while 57.2% identified themselves as third  
263 gender. Almost half (48.0%) of the participants reported dressing up as a woman all the time;  
264 45% ever used hormone/non-hormone substance; and 14.0% ever injected hormone.

265 HIV prevalence was significantly higher among participants living in urban communities  
266 compared to that among participants living in rural communities (6.5% vs. 2.6%;  $p= 0.02$ ). The  
267 prevalence was also significantly different in age groups: 3.0% in participants in the age group  
268 of 18-24, 8.2% in 25-34, 13.1% in 35-44, and 11.4% in 45 or older ( $p< 0.001$ ). HIV prevalence  
269 was also significantly higher among those who never attended school or dropped out of prima-  
270 ry school when compared to those who at least attended high school or higher (10.4% vs. 8.0%;  
271  $p= <0.001$ ). In addition, HIV prevalence was significantly higher among transgender women who  
272 were NGO staff (mainly HIV focused NGOs) (20.6%) and unemployed (9.4%) ( $p= 0.03$ ). Regard-  
273 ing gender identity, HIV prevalence was significantly higher among transgender women who

274 reported dressing up in female-gendered clothing all the time (8.5% vs. 3.5%,  $p= 0.001$ ), among  
 275 those who ever used female hormone (8.1% vs. 4.1%,  $p= 0.02$ ), and among those who ever in-  
 276 jected hormone (9.1% vs. 5.2%,  $p= 0.002$ ) compared to those who did not. Moreover, HIV prev-  
 277 alence was significantly higher among transgender women who reported never using online  
 278 services developed MSM or transgender women such as Facebook pages, websites, etc. (9.5%  
 279 vs. 3.9%,  $p< 0.001$ ).

280

281 **Table 1** Comparisons of socio-demographics, gender identity, and hormone use among

282 transgender women with HIV reactive and non-reactive test

| Socio-demographics, gender identity,<br>and hormone use | Total<br>( <i>n</i> = 1375) | HIV test result              |                                    | <i>P</i> -value* |
|---------------------------------------------------------|-----------------------------|------------------------------|------------------------------------|------------------|
|                                                         |                             | Reactive<br>( <i>n</i> = 81) | Non-reactive<br>( <i>n</i> = 1294) |                  |
|                                                         | <i>n</i> (%)                | <i>n</i> (%)                 | <i>n</i> (%)                       |                  |
| Community type                                          |                             |                              |                                    |                  |
| Urban                                                   | 1146 (83.4)                 | 75 (6.5)                     | 1071 (93.5)                        | 0.02             |
| Rural                                                   | 229 (16.6)                  | 6 (2.6)                      | 223 (97.4)                         |                  |
| Age in years                                            |                             |                              |                                    |                  |
| 18- 24                                                  | 729 (53.0)                  | 22 (3.0)                     | 707 (97.0)                         | <0.001           |
| 25-34                                                   | 503 (36.6)                  | 41 (8.2)                     | 462 (91.8)                         |                  |
| ≥35                                                     | 143 (10.4)                  | 18 (12.6)                    | 125 (87.4)                         |                  |
| Current marital status                                  |                             |                              |                                    |                  |
| Married                                                 | 7 (0.5)                     | 0 (0.0)                      | 7 (100)                            | 0.47             |
| Widowed/divorced/separated                              | 18 (1.3)                    | 1 (5.6)                      | 17 (94.4)                          |                  |
| Never married                                           | 1334 (97.2)                 | 78 (5.9)                     | 1256 (94.1)                        |                  |

|    |                                           |             |           |             |        |
|----|-------------------------------------------|-------------|-----------|-------------|--------|
| 1  |                                           |             |           |             |        |
| 2  |                                           |             |           |             |        |
| 3  |                                           |             |           |             |        |
| 4  | Refuse to answer                          | 16 (1.2)    | 2 (15.4)  | 11 (84.6)   |        |
| 5  |                                           |             |           |             |        |
| 6  | Years of formal education completed       |             |           |             |        |
| 7  |                                           |             |           |             |        |
| 8  |                                           |             |           |             |        |
| 9  | Primary (0-6 years)                       | 307 (22.3)  | 32 (10.4) | 275 (89.6)  | <0.001 |
| 10 |                                           |             |           |             |        |
| 11 | High school or higher (>7 years)          | 1068 (77.7) | 49 (4.6)  | 1019 (95.4) |        |
| 12 |                                           |             |           |             |        |
| 13 |                                           |             |           |             |        |
| 14 | Main occupation                           |             |           |             |        |
| 15 |                                           |             |           |             |        |
| 16 | Unemployed                                | 64 (4.7)    | 6 (9.4)   | 58 (90.6)   | 0.03   |
| 17 |                                           |             |           |             |        |
| 18 | Hair dresser/beautician                   | 482 (35.1)  | 24 (5.0)  | 458 (95.0)  |        |
| 19 |                                           |             |           |             |        |
| 20 | Office worker                             | 50 (3.6)    | 3 (6.0)   | 47 (94.0)   |        |
| 21 |                                           |             |           |             |        |
| 22 | Labor/farmer                              | 241 (17.5)  | 15 (6.2)  | 226 (93.8)  |        |
| 23 |                                           |             |           |             |        |
| 24 | Seller                                    | 149 (10.8)  | 10 (6.7)  | 139 (93.3)  |        |
| 25 |                                           |             |           |             |        |
| 26 | Entertainment Worker                      | 203 (14.8)  | 10 (4.9)  | 193 (95.1)  |        |
| 27 |                                           |             |           |             |        |
| 28 | Student                                   | 108 (7.9)   | 1 (0.9)   | 107 (99.1)  |        |
| 29 |                                           |             |           |             |        |
| 30 | NGO staff                                 | 34 (2.5)    | 7 (20.6)  | 27 (79.4)   |        |
| 31 |                                           |             |           |             |        |
| 32 | Other                                     | 44 (3.2)    | 5 (11.4)  | 39 (88.6)   |        |
| 33 |                                           |             |           |             |        |
| 34 |                                           |             |           |             |        |
| 35 |                                           |             |           |             |        |
| 36 |                                           |             |           |             |        |
| 37 |                                           |             |           |             |        |
| 38 |                                           |             |           |             |        |
| 39 | Monthly income in the past 6 months (USD) |             |           |             |        |
| 40 |                                           |             |           |             |        |
| 41 | < 100                                     | 351 (25.6)  | 22 (6.3)  | 329 (93.7)  | 0.70   |
| 42 |                                           |             |           |             |        |
| 43 | 100-199                                   | 530 (38.6)  | 29 (5.5)  | 501 (94.5)  |        |
| 44 |                                           |             |           |             |        |
| 45 | 200-299                                   | 266 (19.3)  | 19 (7.1)  | 247 (92.9)  |        |
| 46 |                                           |             |           |             |        |
| 47 | ≥300                                      | 226 (16.5)  | 11 (4.9)  | 215 (95.1)  |        |
| 48 |                                           |             |           |             |        |
| 49 |                                           |             |           |             |        |
| 50 |                                           |             |           |             |        |
| 51 |                                           |             |           |             |        |
| 52 | Gender identity (self-identified)         |             |           |             |        |
| 53 |                                           |             |           |             |        |
| 54 |                                           |             |           |             |        |
| 55 | Female                                    | 580 (42.2)  | 29 (5.0)  | 551 (95.0)  | 0.35   |
| 56 |                                           |             |           |             |        |
| 57 |                                           |             |           |             |        |
| 58 |                                           |             |           |             |        |
| 59 |                                           |             |           |             |        |
| 60 |                                           |             |           |             |        |

|                                                                     |              |          |             |        |
|---------------------------------------------------------------------|--------------|----------|-------------|--------|
| Third gender                                                        | 786 (57.2)   | 52 (6.6) | 734 (93.4)  |        |
| Uncertain                                                           | 8 (0.6)      | 0 (0.0)  | 8 (100)     |        |
| Frequency of dressing up in female-gendered clothing                |              |          |             |        |
| All the time                                                        | 660 (48.0)   | 56 (8.5) | 604 (91.5)  | 0.001  |
| Not all the time                                                    | 715 (52.0)   | 25 (3.5) | 689 (96.5)  |        |
| Ever use injected hormone                                           |              |          |             |        |
| No                                                                  | 1123 (81.7)  | 58 (5.2) | 1065 (94.8) | 0.02   |
| Yes                                                                 | 252 (18.3)   | 23 (9.1) | 229 (90.9)  |        |
| Ever self-injected hormones                                         |              |          |             |        |
| No                                                                  | 1,358 (98.8) | 77 (5.7) | 1281 (94.3) | 0.002  |
| Yes                                                                 | 17 (1.2)     | 4 (25.5) | 13 (76.5)   |        |
| Ever shared needle during injecting hormone/beauty substance        |              |          |             |        |
| No                                                                  | 1355 (98.5)  | 78 (5.8) | 550 (94.2)  | 0.33   |
| Yes                                                                 | 20 (3.2)     | 2 (10.0) | 18 (90.0)   |        |
| Ever used online services developed MSM/TG (e.g. Facebook, website) |              |          |             |        |
| No                                                                  | 483 (35.1)   | 46 (9.5) | 437 (90.5)  | <0.001 |
| Yes                                                                 | 892 (64.9)   | 35 (3.9) | 857 (96.1)  |        |

Abbreviations: HIV, human immunodeficiency virus; USD, United States dollar.

\*Chi-square or Fisher's exact test was used as appropriate.

## Sexual behaviors

Sexual behaviors among transgender women with reactive and non-reactive HIV test are shown in Table 2. An overwhelming majority of study participants (87.5%) reported only having had receptive anal sex in the past 12 months. Of the total, 86.0% reported having had anal sex with at least one man within the previous three months, with the median number of male sex part-

ners in the past three months of three (IQR 1-9). Of those who were sexually active with men in the past three months, 61.9% reported having used a condom at last sex with a man.

A total of 94.8% of participants who had anal sex in the past three months reported having at least one non-transactional male sex partner within the past three months; of which, 62.1% reported always using condoms with non-transactional male sex partners in the past three months. Of participants who had sex in the past three months, 41.8% reported having sex with at least one man in exchange for money or gift in the past three months; of whom 60.0% reported always using condoms with the partners.

Table 2 also shows that HIV prevalence was significantly higher among participants who reported having anal sex with a man in the past three months (6.5% vs. 2.1%,  $p= 0.02$ ) and who reported having sex with at least one man in exchange for money or gift in the past three months (8.1% vs. 5.4%,  $p= 0.04$ ) compared to that among participants who did not.

303

**Table 2** Comparisons of sexual behaviors among transgender women with reactive and non-reactive HIV test

| Sexual behaviors                             | Total<br>( <i>n</i> = 1375) | HIV test result              |                                    | <i>P</i> -value* |
|----------------------------------------------|-----------------------------|------------------------------|------------------------------------|------------------|
|                                              |                             | Reactive<br>( <i>n</i> = 81) | Non-reactive<br>( <i>n</i> = 1294) |                  |
|                                              | <i>n</i> (%)                | <i>n</i> (%)                 | <i>n</i> (%)                       |                  |
| Role in anal sex with a man (past 12 months) |                             |                              |                                    |                  |
| Incentive                                    | 29 (2.2)                    | 1 (3.5)                      | 28 (96.5)                          | 0.73             |
| Receptive                                    | 1145 (87.5)                 | 72 (6.3)                     | 1073 (93.7)                        |                  |
| Both                                         | 135 (10.3)                  | 7 (5.2)                      | 128 (94.8)                         |                  |
| Had anal sex with a man (past 3 months)      |                             |                              |                                    |                  |
| No                                           | 192 (14.0)                  | 4 (2.1)                      | 188 (97.9)                         | 0.02             |

|    |                                                                                       |             |          |             |      |
|----|---------------------------------------------------------------------------------------|-------------|----------|-------------|------|
| 1  |                                                                                       |             |          |             |      |
| 2  |                                                                                       |             |          |             |      |
| 3  |                                                                                       |             |          |             |      |
| 4  | Yes                                                                                   | 1183 (86.0) | 77 (6.5) | 1106 (93.5) |      |
| 5  |                                                                                       |             |          |             |      |
| 6  | Number of male sexual partners (past 3 months)                                        |             |          |             |      |
| 7  |                                                                                       |             |          |             |      |
| 8  |                                                                                       |             |          |             |      |
| 9  | <2                                                                                    | 512 (37.3)  | 24 (4.7) | 488 (95.3)  | 0.14 |
| 10 |                                                                                       |             |          |             |      |
| 11 | ≥2                                                                                    | 861 (62.7)  | 57 (6.6) | 804 (93.4)  |      |
| 12 |                                                                                       |             |          |             |      |
| 13 |                                                                                       |             |          |             |      |
| 14 | Used condom last sex (past 3 months)                                                  |             |          |             |      |
| 15 |                                                                                       |             |          |             |      |
| 16 | No                                                                                    | 451 (38.1)  | 27 (6.0) | 423 (94.0)  | 0.57 |
| 17 |                                                                                       |             |          |             |      |
| 18 | Yes                                                                                   | 732 (61.9)  | 50 (6.8) | 682 (93.2)  |      |
| 19 |                                                                                       |             |          |             |      |
| 20 |                                                                                       |             |          |             |      |
| 21 | Had anal sex with a man not in exchange for money or gift (past 3 months)             |             |          |             |      |
| 22 |                                                                                       |             |          |             |      |
| 23 | No                                                                                    | 61 (5.2)    | 5 (8.2)  | 56 (91.8)   | 0.37 |
| 24 |                                                                                       |             |          |             |      |
| 25 | Yes                                                                                   | 1122 (94.8) | 72 (6.4) | 1050 (93.6) |      |
| 26 |                                                                                       |             |          |             |      |
| 27 |                                                                                       |             |          |             |      |
| 28 |                                                                                       |             |          |             |      |
| 29 | Number of male sexual partner, not in exchange for money or gift (past 3 months)      |             |          |             |      |
| 30 |                                                                                       |             |          |             |      |
| 31 | < 2                                                                                   | 357 (31.9)  | 24 (6.7) | 333 (93.3)  | 0.78 |
| 32 |                                                                                       |             |          |             |      |
| 33 | ≥2                                                                                    | 763 (68.1)  | 48 (6.3) | 715 (93.7)  |      |
| 34 |                                                                                       |             |          |             |      |
| 35 |                                                                                       |             |          |             |      |
| 36 |                                                                                       |             |          |             |      |
| 37 | Condom use with male sexual partner not in exchange for money or gift (past 3 months) |             |          |             |      |
| 38 |                                                                                       |             |          |             |      |
| 39 | Not always                                                                            | 697 (62.1)  | 50 (7.2) | 647 (92.8)  | 0.19 |
| 40 |                                                                                       |             |          |             |      |
| 41 | Always                                                                                | 425 (37.9)  | 22 (5.2) | 403 (94.8)  |      |
| 42 |                                                                                       |             |          |             |      |
| 43 |                                                                                       |             |          |             |      |
| 44 |                                                                                       |             |          |             |      |
| 45 | Had anal sex with a man in exchange for money (past 3 months)                         |             |          |             |      |
| 46 |                                                                                       |             |          |             |      |
| 47 | No                                                                                    | 688 (58.2)  | 37 (5.4) | 651 (94.6)  | 0.04 |
| 48 |                                                                                       |             |          |             |      |
| 49 | Yes                                                                                   | 495 (41.8)  | 40 (8.1) | 455 (91.9)  |      |
| 50 |                                                                                       |             |          |             |      |
| 51 |                                                                                       |             |          |             |      |
| 52 | Number male sexual partners in exchange for money/gifts (past 3 months)               |             |          |             |      |
| 53 |                                                                                       |             |          |             |      |
| 54 |                                                                                       |             |          |             |      |
| 55 | 1                                                                                     | 161 (32.5)  | 12 (7.5) | 149 (92.6)  | 0.72 |
| 56 |                                                                                       |             |          |             |      |
| 57 |                                                                                       |             |          |             |      |
| 58 |                                                                                       |             |          |             |      |
| 59 |                                                                                       |             |          |             |      |
| 60 |                                                                                       |             |          |             |      |



1  
2  
3  
4  $\geq 2$  334 (67.5) 28 (8.4) 306 (91.6)

5  
6 Condom use with male sexual partner in exchange for money or gifts (past 3 months)

7  
8  
9 Not always 164 (40.0) 12 (7.3) 152 (92.7) 0.56

10  
11 Always 246 (60.0) 22 (8.9) 224 (91.1)

12  
13  
14 306 *Abbreviation: HIV, human immunodeficiency virus.*

15 307 *\*Chi-square test or Fisher's exact test was used as appropriate.*

16 308  
17  
18 309 **Sexually transmitted infections (STIs)**

19 310 Overall, 14.0% of participants reported having had at least one STI symptom in the past 12  
20 311 months. Anal and perianal symptoms on the anus were the most common symptoms (6.1%). As  
21 312 shown in Table 3, HIV prevalence was significantly higher among participants who reported  
22 313 having had an STI symptom compared to that among participants who did not have an STI  
23 314 symptom in the past 12 months (11.4% vs. 5.0%;  $p < 0.001$ ). HIV prevalence was also significant-  
24 315 ly higher among participants who reported having had an ulceration or sore in the genital area  
25 316 in the past 12 months compared to that among participants who did not have it (15.2% vs.  
26 317 5.6%;  $p < 0.001$ ).  
27  
28  
29  
30  
31  
32  
33  
34  
35  
36

37 319 **Table 3** Comparisons of STI symptoms among transgender women with reactive and non-  
38 320 reactive HIV test

| STI symptoms                                     | Total<br>(n= 1375) | HIV test result     |                           | P-value* |
|--------------------------------------------------|--------------------|---------------------|---------------------------|----------|
|                                                  |                    | Reactive<br>(n= 81) | Non-reactive<br>(n= 1294) |          |
|                                                  | n (%)              | n (%)               | n (%)                     |          |
| Had experienced any STI symptom (past 12 months) |                    |                     |                           |          |
| No                                               | 1182 (86.0)        | 59 (5.0)            | 1123 (95.0)               | <0.001   |
| Yes                                              | 193 (14.0)         | 22 (11.4)           | 171 (88.6)                |          |

## Ulceration or sores in the genital area (past 12 months)

|     |             |          |            |        |
|-----|-------------|----------|------------|--------|
| No  | 1329 (96.7) | 74 (5.6) | 1255(94.4) | <0.001 |
| Yes | 46 (3.4)    | 7 (15.2) | 39 (84.8)  |        |

## Swelling in the genital area (past 12 months)

|     |             |          |             |       |
|-----|-------------|----------|-------------|-------|
| No  | 1359 (98.8) | 80 (5.9) | 1279 (94.1) | 1.000 |
| Yes | 16 (1.2)    | 1 (6.3)  | 15 (93.7)   |       |

## Abnormal urethral discharge (past 12 months)

|     |             |          |            |      |
|-----|-------------|----------|------------|------|
| No  | 1339 (97.4) | 77 (5.8) | 1262(94.2) | 0.16 |
| Yes | 36 (2.6)    | 4 (11.1) | 32 (88.9)  |      |

## STI symptoms on anal area (past 12 months)

|     |             |          |             |      |
|-----|-------------|----------|-------------|------|
| No  | 1291 (93.9) | 73 (5.6) | 1218 (94.4) | 0.15 |
| Yes | 84 (6.1)    | 8 (9.52) | 76 (90.48)  |      |

## STI symptom in the mouth or throat (past 12 months)

|     |             |           |             |      |
|-----|-------------|-----------|-------------|------|
| No  | 1336 (97.2) | 76 (5.7)  | 1260 (94.3) | 0.07 |
| Yes | 39 (2.8)    | 5 (12.82) | 34 (87.18)  |      |

321 *Abbreviations: HIV, human immunodeficiency virus; STI, sexually transmitted infections.*

322 *\*Chi-square or Fisher's exact test was used as appropriate.*

323

### 324 **Substance use**

325 As shown in Table 5, the majority (75.9%) of participants reported drinking at least one can of  
 326 beer or a glass of wine in the past 3 months, while 10.1% reported using amphetamine-type  
 327 stimulants (Yama, Crystal Ice, Ecstasy), and 0.9% reported using other drugs (marijuana, Heroin,  
 328 etc.) in the previous 12 months. Of total, 1.5% reported having injected any illicit drugs in the  
 329 past 3 months.

330 Table 4 also shows that HIV prevalence was significantly higher among participants who  
 331 did not drink alcohol when compared to that among participants who reported drinking at least  
 332 one can of beer or a glass of wine in the past three months (8.5% vs. 5.1%;  $p= 0.02$ ). Moreover,  
 333 HIV prevalence was significantly higher among participants who reported injecting any illicit  
 334 drugs in the past 3 months compared that among participants who did not (15.0% vs. 5.8%,  $p=$   
 335 0.01).

336

337 **Table 4** Comparisons of substance use among transgender women with reactive and non-  
 338 reactive HIV test

339

| Substance use                                                          | Total<br>( <i>n</i> = 1375) | HIV test result              |                                    | <i>P</i> -value* |
|------------------------------------------------------------------------|-----------------------------|------------------------------|------------------------------------|------------------|
|                                                                        |                             | Reactive<br>( <i>n</i> = 81) | Non-reactive<br>( <i>n</i> = 1294) |                  |
|                                                                        | <i>n</i> (%)                | <i>n</i> (%)                 | <i>n</i> (%)                       |                  |
| Drank at least one can of beer or glass of wine in the past 3 months   |                             |                              |                                    |                  |
| No                                                                     | 331 (24.1)                  | 28 (8.5)                     | 303 (91.5)                         | 0.02             |
| Yes                                                                    | 1042 (75.9)                 | 53 (5.1)                     | 989 (94.9)                         |                  |
| Frequency of having more than 5 drinks in one day in the past 3 months |                             |                              |                                    |                  |
| Never more than five drinks                                            | 336 (24.4)                  | 28 (8.3)                     | 308 (91.7)                         | 0.17             |
| Less than once a month                                                 | 771 (56.1)                  | 40 (5.2)                     | 731 (94.8)                         |                  |
| 1-3 times a week                                                       | 157 (11.4)                  | 9 (5.7)                      | 148 (94.3)                         |                  |
| 4 or more times a week                                                 | 111 (8.1)                   | 4 (3.6)                      | 107 (96.4)                         |                  |
| Used illicit drugs in the past 12 months                               |                             |                              |                                    |                  |
| Never                                                                  | 1224 (89.0)                 | 72(5.9)                      | 1152 (94.1)                        | 0.74             |

|                                                               |             |          |             |      |
|---------------------------------------------------------------|-------------|----------|-------------|------|
| Yes, ATS (yama, crystal ice, ecstasy)                         | 139 (10.1)  | 8 (5.8)  | 131 (94.2)  |      |
| Other (marijuana, heroin, etc.)                               | 12 (0.9)    | 1 (8.3)  | 11 (91.7)   |      |
| Injected any illicit drugs in the past 3 months               |             |          |             |      |
| No                                                            | 1355 (98.6) | 78 (5.8) | 1277 (94.2) | 0.01 |
| Yes                                                           | 20 (1.5)    | 3 (15.0) | 17 (85.0)   |      |
| Had sex during/after using illicit drugs in the past 3 months |             |          |             |      |
| No                                                            | 1286 (93.5) | 76 (5.9) | 1210 (94.1) | 1.00 |
| Yes                                                           | 89 (6.5)    | 5 (5.6)  | 84 (94.4)   |      |

Abbreviation: ATS, amphetamine-type stimulant; HIV, human immunodeficiency virus.

\*Chi-square or Fisher's exact test was used as appropriate.

### Factors associated with HIV infection

Table 5 presents independent factors associated with HIV infection in multivariate logistic regression analyses. After adjustment for other covariates, participants living in urban areas were twice as likely to be HIV infected as those living in rural areas (AOR= 2.7, 95% CI= 1.1-6.5). Participants with primary education were 1.7 times as likely to be infected compared to those with high school education (AOR=1.7, 95% CI= 1.0-2.9). HIV infection increased with age; compared to those aged 18-24, the odds of being HIV infected were twice among transgender women aged 25-34 (AOR= 2.1, 95% CI= 1.2-3.6) and 2.8 times higher among those aged  $\geq 35$  (AOR= 2.8, 95% CI= 1.3-6.1). Self-injection of gender affirming hormones was associated with a four-fold increase in the odds of HIV infection (AOR= 4.4, 95% CI= 1.1-17.3). A history of genital sores over the previous 12 months increased the odds of HIV infection by three-fold (AOR= 3.0, 95% CI= 1.2-7.8). Transgender women with stronger feminine identity dressing up as a woman all the time were twice as likely to be HIV infected compared to those who did not dress up as a woman all the time (AOR= 2.1, 95% CI= 1.2-3.8). Having never used online services developed for transgender women in the past six months was also associated with higher odds of being HIV infected (AOR= 1.9, 95% CI= 1.2-3.2).

359

360 **Table 5** Factors associated with HIV infection in multivariate logistic regression model

| Variables in the final model                                   | AOR (95% CI)   | P-value |
|----------------------------------------------------------------|----------------|---------|
| Community type                                                 |                |         |
| Rural                                                          | Reference      |         |
| Urban                                                          | 2.7 (1.1-6.5)  | 0.03    |
| Formal education attained                                      |                |         |
| Primary (0 – 6 years)                                          | 1.7 (1.1-2.9)  | 0.04    |
| High school or higher ( $\geq 7$ )                             | Reference      |         |
| Age in years                                                   |                |         |
| <25                                                            | Reference      |         |
| 25-34                                                          | 2.1 (1.2-3.6)  | 0.01    |
| $\geq 35$                                                      | 2.6 (1.3-5.4)  | 0.01    |
| Frequency of express and/or dressing up as a woman             |                |         |
| Not all the time                                               | Reference      |         |
| All the time                                                   | 2.1 (1.2-3.8)  | 0.01    |
| Ever self-injected hormone                                     |                |         |
| No                                                             | Reference      |         |
| Yes                                                            | 4.4 (1.1-17.3) | 0.03    |
| Ulcerations or sores in the genital area in the past 12 months |                |         |
| No                                                             | Reference      |         |

|     |               |      |
|-----|---------------|------|
| Yes | 3.0 (1.2-7.8) | 0.02 |
|-----|---------------|------|

Used online services developed MSM/TG in the past 6 months (e.g. Facebook, website)

|    |               |      |
|----|---------------|------|
| No | 1.9 (1.2-3.2) | 0.01 |
|----|---------------|------|

|     |           |  |
|-----|-----------|--|
| Yes | Reference |  |
|-----|-----------|--|

---

361 *Abbreviations: AOR, adjusted odds ratio; CI, confidence interval; HIV, human immunodeficiency virus.*

362 *\*Variables in the table were the ones that remained statistically significant after several steps of model*  
 363 *fitting.*

## 365 DISCUSSION

366 This study reports important findings related to factors associated with HIV infection among  
 367 transgender women in Cambodia. First, the HIV prevalence among transgender women residing  
 368 in urban communities was twice compared to that among transgender women living in rural  
 369 communities. This finding is similar to that in a previous study that found higher HIV prevalence  
 370 in transgender women living in urban areas of Siem Reap and Phnom Penh, compared to that  
 371 among transgender women living in other provinces.<sup>22</sup> Findings from our study suggest that  
 372 these differences may not necessarily be attributable to common sexual risk practices. The  
 373 mean number of sexual partners (8.4 vs. 7.9;  $p$ -value=0.70) and the mean number of male  
 374 commercial sexual partners (0.7 vs. 0.7;  $p$ -value= 0.48) in the past three months among  
 375 transgender women living in urban and rural communities were not significantly different. In  
 376 addition, the rates of inconsistent condom use with male non-commercial sexual partners in  
 377 the past three months were also similar in the two groups (58.0% vs. 62%;  $p$ = 0.32).

378 Given the failure of sexual risk behaviors accounting for the difference in HIV preva-  
 379 lence, these data suggest that a higher HIV prevalence among sexual partners of transgender  
 380 women in urban communities may explain the higher probability of urban transgender women  
 381 to get infected, although this may not be stated with certainty. This is particularly relevant giv-  
 382 en that previous studies among all transgender women found a higher prevalence of HIV in ur-  
 383 ban areas.<sup>22</sup> Studies among MSM in Cambodia have also found a higher prevalence of HIV in  
 384 urban areas.<sup>24 30</sup> In addition, a recent national sentinel survey among women attending antena-  
 385 tal care clinics found that HIV prevalence among women in urban areas was consistently high,<sup>31</sup>

1  
2  
3 386 implying that HIV prevalence in urban areas among most populations, who potentially include  
4  
5 387 transgender women and their partners, is high. It is also possible that transgender population in  
6  
7 388 urban communities face unique or additional risks compared to other members of this popula-  
8  
9 389 tion in rural areas,<sup>22</sup> which could also contribute to the difference in HIV prevalence between  
10  
11 390 urban and rural communities. Nevertheless, further research is needed with regard to this ob-  
12  
13 391 servation.

14  
15 392 Second, HIV prevalence among older transgender women ( $\geq 25$  years) was significantly  
16  
17 393 higher, compared to that among their younger counterparts. This finding is similar to those of  
18  
19 394 previous studies in Cambodia<sup>22</sup> and Thailand.<sup>3</sup> A possible explanation is that older transgender  
20  
21 395 women had been exposed to risks for a longer period of time; the number of their sexual part-  
22  
23 396 ners accumulated over time and thus increased cumulative probability of HIV acquisition.<sup>22</sup>

24 397 Third, our study suggested that more overt feminine expression (e.g., those who wore  
25  
26 398 female gendered clothes all the time) was associated with a higher HIV prevalence among  
27  
28 399 transgender women. A study in the United States found that transgender women who disclosed  
29  
30 400 their female gender identity possessed a higher HIV prevalence.<sup>32</sup> In our study, these  
31  
32 401 transgender women who dressed up as a woman all the time had higher numbers of both male  
33  
34 402 non-commercial (mean= 8.1 vs. 5.1;  $p= 0.004$ ) and male commercial sexual partners (mean= 3.7  
35  
36 403 vs. 1.6;  $p < 0.001$ ), compared to those who did not. Making their female status visible could ren-  
37  
38 404 der more chances to meet with men. However, it could make them difficult to find a decent job  
39  
40 405 due to stigmatization and discrimination, thus leading them to engage in sex work. This finding  
41  
42 406 is in line with existing literature showing that transgender women try to have sex with men –  
43  
44 407 both casual and paid sex– to prove or validate their female gender identity.<sup>33–35</sup> In these con-  
45  
46 408 texts, “sex work provides both desired gender affirmation and economic stability, often with  
47  
48 409 greater financial rewards for sex without a condom.”<sup>33</sup> The desire to affirm their gender identi-  
49  
50 410 ty and attractiveness to men also incentivizes them to engage in casual sex with multiple part-  
51  
52 411 ners.<sup>15</sup> This sexual behavior makes them more prone to HIV infection.

53 412 There is a tendency to self-inject gender-affirming hormones, often with shared needles,  
54  
55 413 among transgender women in Cambodia.<sup>36</sup> This risky practice was associated with an increased  
56  
57 414 risk of HIV infection, implying that self-injecting was performed through unsafe means, and that  
58  
59  
60

1  
2  
3 415 injecting by a trained health or other professional might mitigate the likelihood of HIV infection.  
4  
5 416 Although hormone injection to augment femininity is becoming more common, it can potential-  
6  
7 417 ly cause adverse health effects among transgender women.<sup>3 37</sup> A Thai study also found that  
8  
9 418 transgender women who injected hormone to make them more feminine had a higher HIV  
10  
11 419 prevalence.<sup>3</sup>

12  
13 420 Fourth, transgender women who completed or dropped out primary school had a higher  
14  
15 421 HIV prevalence than those with high-school education. This finding confirms results of the  
16  
17 422 TGIBBS 2012 in Cambodia<sup>22</sup> and other studies<sup>6 38</sup> that associated low education with high HIV  
18  
19 423 prevalence among transgender women. This has important implications for HIV programs to  
20  
21 424 ensure that poorly educated transgender women are reached with education, information,  
22  
23 425 communication, and skills related to HIV prevention and other health-related services.

24  
25 426 Fifth, transgender women with self-reported STI symptoms (having ulcerations or sores  
26  
27 427 in the genital area in the past 12 months) had a greater HIV prevalence. This is in line with exist-  
28  
29 428 ing evidence showing that STIs promote HIV transmission via a variety of biological mecha-  
30  
31 429 nisms.<sup>39</sup> Transgender women with high rates of STIs, particularly ulcerative genital diseases, are  
32  
33 430 at high risk of HIV acquisition.<sup>2 3</sup>

34  
35 431 Finally, transgender women who reported never using online services developed for  
36  
37 432 transgender women or MSM had an increased risk of HIV infection. Low utilization of online  
38  
39 433 services by key populations in Cambodia is iterated in other studies.<sup>40</sup> Non-users of online ser-  
40  
41 434 vices might have riskier sexual behaviors. Our data suggest that transgender women who did  
42  
43 435 not use online services had higher numbers of overall male sexual partners (10.2 vs. 6.3,  $p=$   
44  
45 436 0.002) and male commercial sexual partners (0.8 vs. 0.6,  $p$ -value= 0.001) in the past three  
46  
47 437 months. Also, they had a higher rate of inconsistent condom use with male commercial sexual  
48  
49 438 partners in the past three months (48.5% vs. 34.4%,  $p=$  0.004). Studies in other settings confirm  
50  
51 439 that transgender women with multiple sexual partners are exposed to a riskier level of HIV in-  
52  
53 440 fection.<sup>6 15</sup> This finding suggests that access to community-based services tailored to  
54  
55 441 transgender population can reduce their vulnerability to HIV as demonstrated in other set-  
56  
57 442 tings.<sup>41</sup> Sustaining and increasing the coverage of internet and peer-led community-based ser-  
58  
59 443 vices for this population is particularly important, given that they are often unable to access  
60



1  
2  
3 444 health services due to stigmatization and discrimination,<sup>16 40</sup> even in health care settings.<sup>18</sup> As in  
4  
5 445 other settings globally,<sup>9</sup> only half of those who were infected with HIV were aware of their sta-  
6  
7 446 tus, demonstrating the need to intensify HIV testing, including self-testing at the community  
8  
9 447 level, which transgender women in Cambodia are willing to use.<sup>42</sup> Our study also found that  
10  
11 448 once diagnosed, the coverage of ART was high in this population.  
12  
13 449

### 14 450 **LIMITATIONS OF THE STUDY**

15  
16 451 Our study covered only 13 city and provinces with the most numbers of transgender women,  
17  
18 452 leaving out the other venues with fewer participants, and thus may not be generalized to all  
19  
20 453 transgender women nationally. Second, the initial seeds of participants were identified and re-  
21  
22 454 cruited by outreach workers of community-based organizations, which could introduce bias to-  
23  
24 455 wards transgender women under their programs, leading to a recruitment bias. This problem  
25  
26 456 could be exacerbated by outreach workers interviewing some participants who had received  
27  
28 457 services from their NGO, which could induce the participants' responses. Third, this study em-  
29  
30 458 ployed a self-reporting questionnaire on sensitive health and sexual behaviors, which may have  
31  
32 459 been limited by social desirability bias. Fourth, albeit minimal, the monetary incentive given to  
33  
34 460 the participants to recruit seeds may have affected their genuine motivation to partake in the  
35  
36 461 study, which could influence their responses. Finally, as this study was cross-sectional, it reports  
37  
38 462 associations at a given time, and may not be construed to be reporting causal relationships.  
39  
40 463

### 41 464 **CONCLUSIONS**

42  
43 465 This study demonstrates that HIV prevalence among transgender women in Cambodia remains  
44  
45 466 persistently high. With the prevalence rate at 5.9%, higher prevalence was observed among  
46  
47 467 transgender women who resided in urban areas, of older age, with low education levels, with  
48  
49 468 previous STI symptoms, with a history of self-injected hormone, and those who had never used  
50  
51 469 online services developed for transgender women or MSM. Therefore, to eliminate HIV infec-  
52  
53 470 tion among transgender women, tailored interventions need to focus on these sub-populations  
54  
55 471 and attendant risk factors.  
56  
57 472  
58  
59  
60

1  
2  
3 473 **Acknowledgments** This study was conducted in collaboration between the consortium partners  
4  
5 474 of the HIV/AIDS Flagship Project including KHANA, FHI360, PSI/PSK and the 13 Provincial Health  
6  
7 475 Departments under the leadership of National Center for HIV/AIDS, Dermatology and STD  
8  
9 476 (NCHADS). We thank all implementing partners and participants in the study who fully support-  
10  
11 477 ed during the study design and data collection. Disclaimer: Content of this paper is the respon-  
12  
13 478 sibility of the authors and does not reflect the view of USAID or our respective institutions.  
14

15 479  
16  
17 480 **Contributors** SC, ST, PM, CL and SY designed the study, developed the research protocol and  
18  
19 481 tools. SC, CN and SY analyzed the data, interpreted the results and wrote the manuscript. PC,  
20  
21 482 SC, CL, KP, ST and PM were responsible for training and data collection. JM, JD and GB support-  
22  
23 483 ed findings analyses and manuscript writing. All authors read and approved the final manu-  
24  
25 484 script.  
26

27 485

#### 28 486 **Funding**

29  
30 487 This study was funded by the United States Agency for International Development (USAID).  
31

32 488

33 489 **Competing interests** None declared.  
34

35 490

37 491 **Patient consent** Obtained  
38

39 492

41 493 **Ethics approval** The National Ethics Committee for Health Research, Ministry of Health, Cam-  
42  
43 494 bodia.  
44

45 495

47 496 **Consent for publication**

48  
49 497 Consent to publish was obtained from participants as stated in the informed consent form.  
50

51 498

52 499 **Data sharing statement** Data used for this study cannot be made available in the manuscript,  
53  
54 500 the supplemental files, or a public repository due to the ethical restriction stated in the agree-  
55

56

57

58

59

60

1  
2  
3 501 ment with the National Ethics Committee for Health Research. However, they can be accessed  
4  
5 502 upon request from the Principal Investigator (Dr. Siyan Yi) at [siyan@doctor.com](mailto:siyan@doctor.com).

6  
7 503 **REFERENCES**

- 8  
9 504 1. Baral SD, Poteat T, Stromdahl S, *et al*. Worldwide burden of HIV in transgender women:  
10  
11 505 a systematic review and meta-analysis. *Lancet Infect Dis* 2013;13(3):214-22.
- 12  
13 506 2. Silva-Santisteban A, Raymond HF, Salazar X, *et al*. Understanding the HIV/AIDS epidemic  
14  
15 507 in transgender women of Lima, Peru: results from a sero-epidemiologic study using  
16  
17 508 respondent driven sampling. *AIDS Behav* 2012;16(4):872-81.
- 18  
19 509 3. Guadamuz TE, Wimonasate W, Varangrat A, *et al*. HIV prevalence, risk behavior, hormone  
20  
21 510 use and surgical history among transgender persons in Thailand. *AIDS Behav*  
22  
23 511 2011;15(3):650-8.
- 24  
25 512 4. Brennan J, Kuhns LM, Johnson AK, *et al*. Syndemic theory and HIV-related risk among  
26  
27 513 young transgender women: the role of multiple, co-occurring health problems and social  
28  
29 514 marginalization. *Am J Public Health* 2012;102(9):1751-7.
- 30  
31 515 5. Nemoto T, Operario D, Keatley J, *et al*. HIV risk behaviors among male-to-female  
32  
33 516 transgender persons of color in San Francisco. *Am J Public Health* 2004;94(7):1193-9.
- 34  
35 517 6. Clements-Nolle K, Marx R, Guzman R, *et al*. HIV prevalence, risk behaviors, health care  
36  
37 518 use, and mental health status of transgender persons: implications for public health  
38  
39 519 intervention. *Am J Public Health* 2001;91(6):915-21.
- 40  
41 520 7. Gay and Lesbian Medical Association. *Healthy People 2010 Companion Document for*  
42  
43 521 *Lesbian, Gay, Bisexual, and Transgender (LGBT) Health*. San Francisco, CA, United States:  
44  
45 522 Gay and Lesbian Medical Association, 2001.
- 46  
47 523 8. Poteat T, Reisner SL, Radix A. HIV epidemics among transgender women. *Curr Opin HIV*  
48  
49 524 *AIDS* 2014;9(2):168-73.
- 50  
51 525 9. United Nations Programme on HIV/AIDS (UNAIDS). *Fast Track: Ending the AIDS epidemic*  
52  
53 526 *by 2030*. Geneva, Switzerland: UNAIDS, 2014
- 54  
55 527 10. Wiessing LG, van Roosmalen MS, Koedijk P, *et al*. Silicones, hormones and HIV in  
56  
57 528 transgender street prostitutes. *AIDS* 1999;13(16):2315-6.
- 58  
59  
60

- 1  
2  
3 529 11. Global Forum on MSM and HIV. *MSM and HIV/AIDS Risk in Asia : What Is Fueling the*  
4  
5 530 *Epidemic Among MSM and How Can It Be Stopped?* Oakland, CA, United States: Global  
6  
7 531 Forum on MSM and HIV, 2006.  
8  
9 532 12. De Santis JP. HIV infection risk factors among male-to-female transgender persons: a  
10  
11 533 review of the literature. *J Assoc Nurses AIDS Care* 2009;20(5):362-72.  
12  
13 534 13. Operario D, Nemoto T, Iwamoto M, *et al.* Unprotected sexual behavior and HIV risk in  
14  
15 535 the context of primary partnerships for transgender women. *AIDS Behav*  
16  
17 536 2011;15(3):674-82.  
18  
19 537 14. Bockting WO, Robinson BE, Forberg J, *et al.* Evaluation of a sexual health approach to  
20  
21 538 reducing HIV/STD risk in the transgender community. *AIDS care* 2005;17(3):289-303.  
22  
23 539 15. Bockting WO, Robinson BE, Rosser BR. Transgender HIV prevention: a qualitative needs  
24  
25 540 assessment. *AIDS care* 1998;10(4):505-25.  
26  
27 541 16. Chakrapani V, Newman PA, Shunmugam M, *et al.* Syndemics of depression, alcohol use,  
28  
29 542 and victimisation, and their association with HIV-related sexual risk among men who  
30  
31 543 have sex with men and transgender women in India. *Glob Public Health* 2015:1-16.  
32  
33 544 17. Nemoto T, Iwamoto M, Perngparn U, *et al.* HIV-related risk behaviors among kathoey  
34  
35 545 (male-to-female transgender) sex workers in Bangkok, Thailand. *AIDS care*  
36  
37 546 2012;24(2):210-9.  
38  
39 547 18. Scheim AI, Santos GM, Arreola S, *et al.* Inequities in access to HIV prevention services for  
40  
41 548 transgender men: results of a global survey of men who have sex with men. *J Int AIDS*  
42  
43 549 *Soc* 2016;19(3 Suppl 2):20779.  
44  
45 550 19. Schneiders ML, Weissman A. Determining barriers to creating an enabling environment  
46  
47 551 in Cambodia: results from a baseline study with key populations and police. *J Int AIDS*  
48  
49 552 *Soc* 2016;19(4 Suppl 3):20878.  
50  
51 553 20. Brennan J, Kuhns LM, Johnson AK, *et al.* Syndemic theory and HIV-related risk among  
52  
53 554 young transgender women: the role of multiple, co-occurring health problems and social  
54  
55 555 marginalization. *Am J Public Health* 2012;102(9):1751-7.  
56  
57  
58  
59  
60

- 1  
2  
3 556 21. Raiford JL, Hall GJ, Taylor RD, *et al.* The Role of Structural Barriers in Risky Sexual  
4  
5 557 Behavior, Victimization and Readiness to Change HIV/STI-Related Risk Behavior Among  
6  
7 558 Transgender Women. *AIDS behav* 2016;20(10):2212-21.  
8  
9 559 22. Weissman A, Ngak S, Srean C, *et al.* HIV Prevalence and Risks Associated with HIV  
10  
11 560 Infection among Transgender Individuals in Cambodia. *PLoS One* 2016;11(4):e0152906.  
12  
13 561 23. Chhorvann C, Vonthanak S. *Estimations and Projections of HIV/AIDS in Cambodia 2010-*  
14  
15 562 *2015*. Phnom Penh, Cambodia: National Center for HIV/AIDS, Dermatology and STDs  
16  
17 563 (NCHADS), 2011.  
18  
19 564 24. Liu K, Chhea C. *The BROS Khmer: Behavioral risks on-site serosurvey among at-risk urban*  
20  
21 565 *men in Cambodia*. Phnom Penh, Cambodia: FHI 360, 2010.  
22  
23 566 25. National Center for HIV/AIDS, Dermatology and STD (NCHADS). *Standard Operation*  
24  
25 567 *Procedure (SoP) for Boosted Continuum of Prevention to Care and Treatment for Most at*  
26  
27 568 *Risk Population in Cambodia*. Phnom Penh, Cambodia: NCHADS, 2013.  
28  
29 569 26. Mun P, Chhim S, Chhoun P, *et al.* *National Popualtion Size Estimation, HIV related Risk*  
30  
31 570 *Behaoviors, and HIV Prevrence among Men who Sex with Men in Cambodia in 2014*.  
32  
33 571 Phnom Penh, Cambodia: NCHADS/KHANA, 2016.  
34  
35 572 27. FHI360. *Size estimation of Transgender Population in Cambodia, 2012*. Phnom Penh,  
36  
37 573 Cambodia: FHI 360, 2012.  
38  
39 574 28. National Center for HIV/AIDS, Detamatology and STD (NCHADS). *Standard Operating*  
40  
41 575 *Procedures for HIV Testing and Counseling (HTC)*. Phnom Penh, Cambodia: NCHADS,  
42  
43 576 2012.  
44  
45 577 29. FHI360. *Behavioral Surveillance Surveys (BSS). Guideline for Repeated behavioral Surveys*  
46  
47 578 *in Population at Risk of HIV*. Washington DC, United States: FHI360, 2000.  
48  
49 579 30. Yi S, Chhim S, Chhoun P, *et al.* Men who have sex with men in Cambodia: Population  
50  
51 580 size, HIV risky behaviors, and HIV prevalence. *Am J Epidemiol Infect Dis* 2016;4(5):91-9  
52  
53 581 31. Mun P, Sopheab H, Tuot S, *et al.* *National HIV sentinel survey among women attending*  
54  
55 582 *antenatal care in Cambodia 2014*. Phnom Penh, Cambodia: NCHADS, 2016.  
56  
57  
58  
59  
60

- 1  
2  
3 583 32. Nuttbrock L, Hwahng S, Bockting W, *et al.* Lifetime risk factors for HIV/sexually  
4 transmitted infections among male-to-female transgender persons. *J Acquir Immune*  
5 584 *Defic Syndr* 2009;52(3):417-21.  
6  
7 585  
8  
9 586 33. Melendez RM, Pinto R. 'It's really a hard life': Love, gender and HIV risk among male-to-  
10 female transgender persons. *Cult Health Sex* 2007;9(3):233-45.  
11 587  
12  
13 588 34. Sevelius JM. Gender Affirmation: A Framework for Conceptualizing Risk Behavior Among  
14 Transgender Women of Color. *Sex Roles* 2013;68(11):675-89.  
15 589  
16  
17 590 35. Sausa LA, Keatley J, Operario D. Perceived risks and benefits of sex work among  
18 transgender women of color in San Francisco. *Arch Sex Behav* 2007;36(6):768-77.  
19 591  
20  
21 592 36. Yi S, Ngin C, Tuot S, *et al.* HIV prevalence, risky behaviors, and discrimination  
22 593 experiences among transgender women in Cambodia: Descriptive findings from a  
23 national integrated biological and behavioral survey. *BMC Int Health Hum Rights* 2016.  
24 594 (In press).  
25  
26 595  
27  
28 596 37. Sanchez NF, Sanchez JP, Danoff A. Health Care Utilization, Barriers to Care, and  
29 Hormone Usage Among Male-to-Female Transgender Persons in New York City. *Am J*  
30 597 *Public Health* 2009;99(4):713-9.  
31 598  
32  
33 599 38. Simon PA, Reback CJ, Bemis CC. HIV prevalence and incidence among male-to-female  
34 transsexuals receiving HIV prevention services in Los Angeles County. *AIDS*  
35 600 2000;14(18):2953-5.  
36 601  
37  
38 602 39. Fleming DT, Wasserheit JN. From epidemiological synergy to public health policy and  
39 practice: the contribution of other sexually transmitted diseases to sexual transmission  
40 603 of HIV infection. *Sex Transm Infect* 1999;75(1):3-17.  
41 604  
42  
43 605 40. HIV Innovate and Evaluate Project, University Research Co., LLC (URC-HIEP). *Evaluation*  
44 606 *of the HIV Program for Transgender Women in Cambodia*. Phnom Penh, Cambodia: URC-  
45 HIEP, 2016.  
46 607  
47  
48 608 41. Shaikh S, Mburu G, Arumugam V, *et al.* Empowering communities and strengthening  
49 609 systems to improve transgender health: outcomes from the Pehchan programme in  
50 India. *J Int AIDS Soc* 2016;19(3 Suppl 2):20809.  
51 610  
52  
53  
54  
55  
56  
57  
58  
59  
60

1  
2  
3 611 42. Pal K, Ngin C, Tuot S, *et al.* Acceptability Study on HIV Self-Testing among Transgender  
4  
5 612 Women, Men who Have Sex with Men, and Female Entertainment Workers in  
6  
7 613 Cambodia: A Qualitative Analysis. PloS One 2016;11(11):e0166129.  
8

9 614

10 615

11 616

12 617

13  
14  
15  
16  
17  
18  
19  
20  
21  
22  
23  
24  
25  
26  
27  
28  
29  
30  
31  
32  
33  
34  
35  
36  
37  
38  
39  
40  
41  
42  
43  
44  
45  
46  
47  
48  
49  
50  
51  
52  
53  
54  
55  
56  
57  
58  
59  
60

For peer review only

Participant ID Code: .....

## Integrated Biological and Behavioral Survey of Transgender Women in Cambodia, 2016

Date of interview: day.....month.....year.....

Province/City:

- |                     |                     |                  |
|---------------------|---------------------|------------------|
| 1. Phnom Pehn       | 6. Preah Sihanouk   | 11. Kandal       |
| 2. Kampong Cham     | 7. Prey Veng        | 12. Koh Kong     |
| 3. Battambang       | 8. Svay Rieng       | 13. Thbong Khmum |
| 4. Siem Reap        | 9. Kampong Spue     |                  |
| 5. Banteay Meanchey | 10. Kampong Chhnang |                  |

Interview Location (City/NGOs): .....

Name of administrative districts (current residence): .....

Status of administrative districts:

- 1- Urban
- 2- Rural

| SECTION 1: SOCIODEMOGRAPHIC CHARACTERISTICS                                             |                                                                          |                                                                                                                                                                                                                                                                               |         |
|-----------------------------------------------------------------------------------------|--------------------------------------------------------------------------|-------------------------------------------------------------------------------------------------------------------------------------------------------------------------------------------------------------------------------------------------------------------------------|---------|
| No.                                                                                     | Questions and filters                                                    | Coding categories                                                                                                                                                                                                                                                             | Skip to |
| <b>Now I would like to ask you some questions related to your personal information.</b> |                                                                          |                                                                                                                                                                                                                                                                               |         |
| Q001                                                                                    | How old are you?                                                         | Age in completed years: .....                                                                                                                                                                                                                                                 |         |
| Q002                                                                                    | What is your current marital status?<br>(only one response)              | Married and living together 1<br>Married ,but not living together 2<br>Widowed, Divorced or separated 3<br>Not married, not living with any partner 4<br>Not married, living with sweetheart (female) 5<br>Not married but living with male lover 6<br>Other (Specify.....) 7 |         |
| Q003                                                                                    | For how long have you been living in the current city?                   | .....Years<br><u>Record 0</u> if not living in this city<br><u>Record 1</u> if living in this city 1 year or less<br>Refuse to answer 99                                                                                                                                      |         |
| Q004                                                                                    | In the past 6 months, on average, how much money did you make per month? | Amount of money (in US\$): .....<br>Refuse to answer 99                                                                                                                                                                                                                       |         |

Questionnaire; Integrated Biological and Behavioral Survey among Transgender Population in Cambodia, 2015, Version 2.0, 17 September 2015 Page 1 of 11



|      |                                                                                                                                                                                     |                                                                                                                                                                                                                                                                                                              |  |
|------|-------------------------------------------------------------------------------------------------------------------------------------------------------------------------------------|--------------------------------------------------------------------------------------------------------------------------------------------------------------------------------------------------------------------------------------------------------------------------------------------------------------|--|
|      | (exchange rate: 4000 riel per 1 US\$)                                                                                                                                               |                                                                                                                                                                                                                                                                                                              |  |
| Q005 | How many years of formal education have you completed?                                                                                                                              | Number of years: .....<br><u>Record 0</u> if never attending school.<br>Refuse to answer 99                                                                                                                                                                                                                  |  |
| Q006 | What is your current job (main source of income)?<br><br>(only one response)<br><br><i>Note: If you are both studying and having a paid job, report your main source of income.</i> | Unemployed 0<br>Hair dresser/Beautician 1<br>Government officer 2<br>Laborer (factory, construction work) 3<br>Seller 4<br>Entertainment Worker (bar, karaoke, etc.) 5<br>Sex worker 6<br>Student 7<br>NGO staff 8<br>Private company staff 9<br>Farmer/fisherman 10<br>Artist 11<br>Other (Specify.....) 12 |  |

| SECTION 2. TRANSGENDER IDENTITY & EXPERIENCES |                                                                                                              |                                                                                             |            |
|-----------------------------------------------|--------------------------------------------------------------------------------------------------------------|---------------------------------------------------------------------------------------------|------------|
| Q007                                          | What gender do you consider yourself?                                                                        | Female 1<br>Male 2<br>Third gender 3<br>Uncertain 4<br>Refuse to answer 99                  |            |
| Q008                                          | How often do you express or dress yourself as a woman?                                                       | All the time 1<br>Often 2<br>Sometimes 3<br>Rarely 4<br>Refuse to answer 99                 |            |
| Q009                                          | How many friends in your social network are also transgender?                                                | Number: .....                                                                               |            |
| Q010                                          | Have you ever taken hormones or any substances for beauty purposes?                                          | No 1<br>Yes 2<br>Refuse to answer 99                                                        | 2→<br>Q014 |
| Q011                                          | What are the methods you have used to take hormones or any substances for beauty purposes? [multiple answer] | Pills 1<br>Injections 2<br>Skin patches 3<br>Other (Specify.....) 4<br>Refuse to answer 99  |            |
| Q012                                          | If you have taken hormones or any substances for beauty purposes by injection, how                           | Never injected 0<br>Injected by myself 1<br>Injected by skilled personnel (beauty clinic) 2 |            |

|      |                                                                                              |                                                               |  |
|------|----------------------------------------------------------------------------------------------|---------------------------------------------------------------|--|
|      | have you received it?                                                                        | Injected by non-skilled personnel 3<br>Other (Specify.....) 4 |  |
| Q013 | If you have injected hormones or any substances for beauty purposes, have you shared needle? | Never injected 0<br>No 1<br>Yes 2<br>Refuse to answer 99      |  |
| Q014 | Have you ever had any operation to change any parts of your body to become a woman?          | No 1<br>Yes 2<br>Refuse to answer 99                          |  |

| <b>Section 3. SEXUAL PARTNERS AND SEXUAL HISTORY</b> |                                                                                                                             |                                                                                   |                    |
|------------------------------------------------------|-----------------------------------------------------------------------------------------------------------------------------|-----------------------------------------------------------------------------------|--------------------|
| <b>No.</b>                                           | <b>Questions and filters</b>                                                                                                | <b>Coding categories</b>                                                          | <b>Skip to</b>     |
|                                                      | <b>Now I would like to ask questions about your recent sexual relationship with various kinds of sexual partners.</b>       |                                                                                   |                    |
| Q015                                                 | Have you ever had sex with any partner in your life time?<br>[Including vaginal, or anal sex]                               | No 0<br>Yes 1<br>Refuse to answer 99                                              |                    |
| Q016                                                 | How likely do you think you are infected with HIV?                                                                          | Very Likely 1<br>Likely 2<br>Unlikely 3<br>Very Unlikely 4<br>Refuse to answer 99 |                    |
| <b>Sex with women</b>                                |                                                                                                                             |                                                                                   |                    |
| Q017                                                 | Have you ever had sex with a woman?<br>[Including vaginal or anal sex]                                                      | No 0<br>Yes 1<br>Refuse to answer 99                                              | 0, 99<br>→<br>Q028 |
| Q018                                                 | In the past 12 months, have you had sex with a woman?<br>[Including vaginal or anal sex]                                    | No 0<br>Yes 1<br>Refuse to answer 99                                              | 0, 99<br>→<br>Q028 |
| Q019                                                 | In the past 12 months, have you had sex with a woman not in exchange for money or gifts?<br>[Including vaginal or anal sex] | No 0<br>Yes 1<br>Refuse to answer 99                                              | 0→<br>Q022         |
| Q020                                                 | In the past 3 month, how many women did you have sex with not in exchange for money or gifts?                               | Number of women: .....<br>Refuse to answer 99                                     |                    |
| Q021                                                 | In the past 3 month, how often did you use a condom when you had vaginal or anal                                            | Never had sex with a woman 0<br>Always 1<br>Often 2                               | 0, 1→<br>Q024      |

Questionnaire; Integrated Biological and Behavioral Survey among Transgender Population in Cambodia, 2015, Version 2.0, 17 September 2015 Page 3 of 11

|      |                                                                                                                                                                          |                                                                                                                                                                                                                                                                                          |            |
|------|--------------------------------------------------------------------------------------------------------------------------------------------------------------------------|------------------------------------------------------------------------------------------------------------------------------------------------------------------------------------------------------------------------------------------------------------------------------------------|------------|
|      | sex with women not in exchange for money or gifts?                                                                                                                       | Sometimes 3<br>Never 4<br>Refuse to answer 99                                                                                                                                                                                                                                            |            |
| Q022 | In the past 3 month, if you did not always use a condom when you had sex with women not in exchange for money or gifts?<br>What were the reasons?<br>[Multiple Answers]  | We are in a relationship 1<br>She is not HIV/STI infected 2<br>Too high to use a condom 3<br>No condom available 4<br>Feel better without a condom 5<br>I am HIV-infected 6<br>I penetrated, so I am not at risk 7<br>Partner refused 8<br>Other (Specify.....) 9<br>Refuse to answer 99 |            |
| Q023 | In the past 12 months, have you had sex with a woman in exchange for money or gifts?<br>[Including vaginal or anal sex]                                                  | No 0<br>Yes 1<br>Refuse to answer 99                                                                                                                                                                                                                                                     | 0→<br>Q028 |
| Q024 | In the past 3 months, how many women did you have sex with in exchange for money or gifts?<br>[Including vaginal or anal sex]                                            | Number of women: .....<br>Refuse to answer 99                                                                                                                                                                                                                                            |            |
| Q025 | Where did you meet women with whom you had sex with in exchange for money or gifts??                                                                                     | Park 1<br>Street 2<br>Bar/discotheque/cafe 3<br>Beer Garden/Restaurant 4<br>Massage Parlor 5<br>Karaoke 6<br>Online (Facebook, Line, Website) 7<br>Guesthouse/hotel 8<br>Workplace/school 9<br>Other (Specify.....) 10                                                                   |            |
| Q026 | In the past 12 months, how often did you use a condom when you had vaginal or anal sex with women in exchange for money or gifts?                                        | Never had sex 0<br>Always 1<br>Often 2<br>Sometimes 3<br>Never 4<br>Refuse to answer 99                                                                                                                                                                                                  |            |
| Q027 | In the past 3 months, if you did not always use a condom when you had sex with women not in exchange for money or gifts?<br>What were the reasons?<br>[Multiple Answers] | We are in a relationship 1<br>She is not HIV/STI infected 2<br>Too high to use a condom 3<br>No condom available 4<br>Feel better without a condom 5<br>I am HIV-infected 6<br>I penetrated, so I am not at risk 7<br>Partner refused 8<br>Other (Specify.....) 9                        |            |

|  |  |                     |  |
|--|--|---------------------|--|
|  |  | Refuse to answer 99 |  |
|--|--|---------------------|--|

| Sex with men |                                                                                                                          |                                                                                                                                                                                                                                                                                                       |                   |
|--------------|--------------------------------------------------------------------------------------------------------------------------|-------------------------------------------------------------------------------------------------------------------------------------------------------------------------------------------------------------------------------------------------------------------------------------------------------|-------------------|
| Q028         | Have you ever had anal sex with a man?                                                                                   | No 0<br>Yes 1<br>Refuse to answer 99                                                                                                                                                                                                                                                                  | 0,<br>99→<br>Q042 |
| Q029         | In the past 12 months, have you had anal sex with a man?                                                                 | No 0<br>Yes 1<br>Refuse to answer 99                                                                                                                                                                                                                                                                  | 0,<br>99→<br>Q042 |
| Q030         | In the past 12 months, what was your usual role in anal sex with a man?                                                  | Insertive 1<br>Receptive 2<br>Both 3<br>Refuse to answer 99                                                                                                                                                                                                                                           |                   |
| Q031         | In the past 3 months, have you had sex with men not in exchange for money or gifts?                                      | No 0<br>Yes 1<br>Refuse to answer 99                                                                                                                                                                                                                                                                  | 0→<br>Q033        |
| Q032         | In the past 3 months, how many men you had sex with not in exchange for money or gifts?                                  | Number of men: .....<br>Refuse to answer 99                                                                                                                                                                                                                                                           |                   |
| Q033         | In the past 12 months, how often did you use a condom when you had anal sex with men not in exchange for money or gifts? | Never had sex 0<br>Always 1<br>Often 2<br>Sometimes 3<br>Never 4<br>Refuse to answer 99                                                                                                                                                                                                               | 0, 1→<br>Q035     |
| Q034         | If not always, why not?<br><br>[Multiple Answers]                                                                        | We are in a relationship 1<br>He is not HIV/STI infected 2<br>I was too drunk or too high with drugs 3<br>No condom available 4<br>Feel better without a condom 5<br>I am HIV-infected 6<br>I penetrated, so I am not at risk 7<br>Partner refused 8<br>Other (Specify.....) 9<br>Refuse to answer 99 |                   |
| Q035         | In the past 12 months, have you had sex with men in exchange for money or gifts?                                         | No 0<br>Yes 1<br>Refuse to answer 99                                                                                                                                                                                                                                                                  | 0→<br>Q040        |
| Q036         | In the past 3 month, how many men you had sex with in exchange for money or                                              | Number of men: .....<br>Refuse to answer 99                                                                                                                                                                                                                                                           |                   |

|      |                                                                                                        |                                                                                                                                                                                                                                                                                                    |               |
|------|--------------------------------------------------------------------------------------------------------|----------------------------------------------------------------------------------------------------------------------------------------------------------------------------------------------------------------------------------------------------------------------------------------------------|---------------|
|      | gifts?                                                                                                 |                                                                                                                                                                                                                                                                                                    |               |
| Q037 | Where did you meet the men you had sex with in exchange for money or gifts?                            | Park 1<br>Street 2<br>Bar/discotheque/cafe 3<br>Beer Garden/Restaurant 4<br>Massage Parlor 5<br>Karaoke 6<br>Online (Facebook, Line, Website) 7<br>Guesthouse/hotel 8<br>Workplace/School 9<br>Other (Specify.....) 10                                                                             |               |
| Q038 | In the past 12 months, how often did you use a condom when you had anal sex with men you paid for sex? | Never had anal sex 0<br>Always 1<br>Often 2<br>Sometimes 3<br>Never 4<br>Refuse to answer 99                                                                                                                                                                                                       | 0, 1→<br>Q615 |
| Q039 | If not always, why not?<br>[Multiple Answers]                                                          | We are in a relationship 1<br>He is not HIV/STI infected 2<br>I was drunk or too high with drugs 3<br>No condom available 4<br>Feel better without a condom 5<br>I am HIV-infected 6<br>I penetrated, so I am not at risk 7<br>Partner refused 8<br>Other (Specify.....) 10<br>Refuse to answer 99 |               |

| Access to condoms and lubricant |                                                                          |                                                                                                                                                                                                                               |         |
|---------------------------------|--------------------------------------------------------------------------|-------------------------------------------------------------------------------------------------------------------------------------------------------------------------------------------------------------------------------|---------|
| No.                             | Questions and filters                                                    | Coding categories                                                                                                                                                                                                             | Skip to |
| Q040                            | In this last 12 months, where did you get condoms?<br>[Multiple Answers] | Friends/outreach workers 1<br>Condom peer sale representative 2<br>Pharmacy/drug store/clinic 3<br>Condom outlets 4<br>Mart/mini-mart 5<br>Groceries 6<br>Hotel/guesthouse 7<br>Other (Specify.....) 8<br>Refuse to answer 99 |         |
| Q041                            | In this last 12 months, where did you get lubricant?                     | Friends/outreach workers 1<br>Condom peer sale representative 2<br>Pharmacy/drug store/clinic 3                                                                                                                               |         |

|  |                    |                                                                                                                            |  |
|--|--------------------|----------------------------------------------------------------------------------------------------------------------------|--|
|  | [Multiple Answers] | Condom outlets 4<br>Mart/mini-mart 5<br>Groceries 6<br>Hotel/guesthouse 7<br>Other (Specify.....) 8<br>Refuse to answer 99 |  |
|--|--------------------|----------------------------------------------------------------------------------------------------------------------------|--|

| SECTION 4. STI AND HIV TESTING |                                                                                                                          |                                                                                                                                                                                                                            |            |
|--------------------------------|--------------------------------------------------------------------------------------------------------------------------|----------------------------------------------------------------------------------------------------------------------------------------------------------------------------------------------------------------------------|------------|
| No.                            | Questions and filters                                                                                                    | Coding categories                                                                                                                                                                                                          | Skip to    |
| Q042                           | In the past 12 months, have you experienced the following symptoms?<br><br>[Multiple Answers]                            | Cuts or sores in the genital area 1<br>Swelling in the genital area 2<br>Abnormal urethral discharge 3<br>Symptoms on the anus 4<br>Symptom in the mouth/throat 5<br>Refuse to answer 99                                   |            |
| Q043                           | Where did you first go for treatment the last time you had any above-mentioned symptoms?<br><br>(Only one response)      | Never had any symptoms 0<br>Pharmacy 1<br>Private clinic/hospital 2<br>Public Hospital/STD clinic 3<br>NGO Clinic/hospital 4<br>Traditional doctor 5<br>Didn't get care 6<br>Other (Specify.....) 7<br>Refuse to answer 99 |            |
| Q044                           | Have you ever been tested for HIV?                                                                                       | No 0<br>Yes 1<br>Refuse to answer 99                                                                                                                                                                                       | 0→<br>Q049 |
| Q045                           | In past 6 months, have you been tested for HIV?                                                                          | No 0<br>Yes 1<br>Refuse to answer 99                                                                                                                                                                                       |            |
| Q046                           | How long has it been since you received the last HIV test?                                                               | Number of months.....                                                                                                                                                                                                      |            |
| Q047                           | If a rapid self-test kit for HIV was available and you could get the result within 20 minutes at home, would you use it? | No 0<br>Yes 1<br>Refuse to answer 99                                                                                                                                                                                       |            |
| Q048                           | Where did you have your most recent HIV test?                                                                            | Private facilities 1<br>Public facilities 2<br>NGO facilities 3<br>NGO outreach workers at community or HTC 4<br>Other (Specify.....) 5<br>Refuse to answer 99                                                             |            |

Questionnaire; Integrated Biological and Behavioral Survey among Transgender Population in Cambodia, 2015, Version 2.0, 17 September 2015 Page 7 of 11

|      |                                                                               |                                                                                                                                                                                                                 |                |
|------|-------------------------------------------------------------------------------|-----------------------------------------------------------------------------------------------------------------------------------------------------------------------------------------------------------------|----------------|
| Q049 | The last time you got tested for HIV, did you receive the result of the test? | No 0<br>Yes 1<br>Refuse to answer 99                                                                                                                                                                            |                |
| Q050 | What is your current HIV status? (You could choose not to answer)             | Positive 1<br>Negative 2<br>I don't know my status 3<br>Refuse to answer 99                                                                                                                                     | 2, 3 →<br>Q057 |
| Q051 | Are you currently on ART?                                                     | No 0<br>Yes 1<br>I was but discontinued 2<br>I am on treatment for opportunistic infections 3<br>Refuse to answer 99                                                                                            | 0 →<br>Q056    |
| Q052 | Do you take ARV regularly as prescribed?                                      | Regularly 1<br>Not regularly 2<br>Refuse to answer 99                                                                                                                                                           |                |
| Q053 | Where do you get ART services?                                                | Public facilities 1<br>Private facilities 2<br>NGO facilities 3<br>Pharmacy 4<br>Other (Specify.....) 5<br>Refuse to answer 99                                                                                  |                |
| Q054 | If not, why are you not on ART?                                               | Not needed 1<br>Not sure where to go 2<br>I am ashamed to go to health facility 3<br>I am afraid of being discriminated 4<br>I was treated badly in the past 5<br>Other (Specify.....) 6<br>Refuse to answer 99 |                |

### SECTION 5. ALCOHOL AND DRUG USE

#### Measurement of alcohol drinking

One standard measurement:

- A can/glass of beer, fermented palm juice (285 ml)
- A glass of wine (120 ml)
- A glass of whisky (30 ml)

| No.  | Questions and filters                                                                                     | Coding categories                                                                                          | Skip to     |
|------|-----------------------------------------------------------------------------------------------------------|------------------------------------------------------------------------------------------------------------|-------------|
| Q055 | In the past 3 months, how often did you drink at least one can of beer or one glass of any types of wine? | Never 1<br>Once a month or less 2<br>2-4 times a month 3<br>2-3 times a week 4<br>4 or more times a week 5 | 1 →<br>Q064 |

Questionnaire; Integrated Biological and Behavioral Survey among Transgender Population in Cambodia, 2015, Version 2.0, 17 September 2015 Page 8 of 11

|      |                                                                                                                                                                                                                                                                                                                                                                                                                                                                                                                                                                                                                                                                                                                                                                                         | Don't know 98<br>Refuse to answer 99                                                                                                                                                   |    |               |     |    |   |           |   |   |   |              |   |   |   |                    |   |   |   |                                |   |   |   |         |   |   |   |                                            |   |   |   |       |   |   |
|------|-----------------------------------------------------------------------------------------------------------------------------------------------------------------------------------------------------------------------------------------------------------------------------------------------------------------------------------------------------------------------------------------------------------------------------------------------------------------------------------------------------------------------------------------------------------------------------------------------------------------------------------------------------------------------------------------------------------------------------------------------------------------------------------------|----------------------------------------------------------------------------------------------------------------------------------------------------------------------------------------|----|---------------|-----|----|---|-----------|---|---|---|--------------|---|---|---|--------------------|---|---|---|--------------------------------|---|---|---|---------|---|---|---|--------------------------------------------|---|---|---|-------|---|---|
| Q056 | In the past 3 months, how many standard drinks containing alcohol (a can of beer or a glass of any types of wine) did you have on a typical day on which you drank alcohol?                                                                                                                                                                                                                                                                                                                                                                                                                                                                                                                                                                                                             | 1 - 2 1<br>3 - 4 2<br>5 - 6 3<br>7 - 9 4<br>10 or more 5<br>Don't know 98<br>Refuse to answer 99                                                                                       |    |               |     |    |   |           |   |   |   |              |   |   |   |                    |   |   |   |                                |   |   |   |         |   |   |   |                                            |   |   |   |       |   |   |
| Q057 | In the past 3 months, how often did you have more than 5 drinks in one day or night?                                                                                                                                                                                                                                                                                                                                                                                                                                                                                                                                                                                                                                                                                                    | Never 1<br>Less than once a month 2<br>Once a month 3<br>1, 2, or 3 times a week 4<br>4 or more times a week 5<br>Don't know 98<br>Refuse to answer 99                                 |    |               |     |    |   |           |   |   |   |              |   |   |   |                    |   |   |   |                                |   |   |   |         |   |   |   |                                            |   |   |   |       |   |   |
| Q058 | In the past 3 months, how often have you got drunk from alcohol?                                                                                                                                                                                                                                                                                                                                                                                                                                                                                                                                                                                                                                                                                                                        | Never 1<br>Less than once a month 2<br>Once a month 3<br>Every week (1-3 times/week) 4<br>Every day/almost every day(4 or more times a week) 5<br>Don't know 98<br>Refuse to answer 99 |    |               |     |    |   |           |   |   |   |              |   |   |   |                    |   |   |   |                                |   |   |   |         |   |   |   |                                            |   |   |   |       |   |   |
| Q059 | <p>In the past 12 months, have you tried any of the following drugs? (Ask one by one – CIRCLE YES OR NO) [Multiple answers]</p> <table border="1"> <thead> <tr> <th></th> <th>Types of drug</th> <th>Yes</th> <th>No</th> </tr> </thead> <tbody> <tr> <td>1</td> <td>Marijuana</td> <td>1</td> <td>0</td> </tr> <tr> <td>2</td> <td>Heroin/Opium</td> <td>1</td> <td>0</td> </tr> <tr> <td>3</td> <td>Yama (amphetamine)</td> <td>1</td> <td>0</td> </tr> <tr> <td>4</td> <td>Crystal, Ice (Methamphetamine)</td> <td>1</td> <td>0</td> </tr> <tr> <td>5</td> <td>Ecstasy</td> <td>1</td> <td>0</td> </tr> <tr> <td>6</td> <td>Inhalants (glue, paint, petrol, spray can)</td> <td>1</td> <td>0</td> </tr> <tr> <td>7</td> <td>Other</td> <td>1</td> <td>0</td> </tr> </tbody> </table> |                                                                                                                                                                                        |    | Types of drug | Yes | No | 1 | Marijuana | 1 | 0 | 2 | Heroin/Opium | 1 | 0 | 3 | Yama (amphetamine) | 1 | 0 | 4 | Crystal, Ice (Methamphetamine) | 1 | 0 | 5 | Ecstasy | 1 | 0 | 6 | Inhalants (glue, paint, petrol, spray can) | 1 | 0 | 7 | Other | 1 | 0 |
|      | Types of drug                                                                                                                                                                                                                                                                                                                                                                                                                                                                                                                                                                                                                                                                                                                                                                           | Yes                                                                                                                                                                                    | No |               |     |    |   |           |   |   |   |              |   |   |   |                    |   |   |   |                                |   |   |   |         |   |   |   |                                            |   |   |   |       |   |   |
| 1    | Marijuana                                                                                                                                                                                                                                                                                                                                                                                                                                                                                                                                                                                                                                                                                                                                                                               | 1                                                                                                                                                                                      | 0  |               |     |    |   |           |   |   |   |              |   |   |   |                    |   |   |   |                                |   |   |   |         |   |   |   |                                            |   |   |   |       |   |   |
| 2    | Heroin/Opium                                                                                                                                                                                                                                                                                                                                                                                                                                                                                                                                                                                                                                                                                                                                                                            | 1                                                                                                                                                                                      | 0  |               |     |    |   |           |   |   |   |              |   |   |   |                    |   |   |   |                                |   |   |   |         |   |   |   |                                            |   |   |   |       |   |   |
| 3    | Yama (amphetamine)                                                                                                                                                                                                                                                                                                                                                                                                                                                                                                                                                                                                                                                                                                                                                                      | 1                                                                                                                                                                                      | 0  |               |     |    |   |           |   |   |   |              |   |   |   |                    |   |   |   |                                |   |   |   |         |   |   |   |                                            |   |   |   |       |   |   |
| 4    | Crystal, Ice (Methamphetamine)                                                                                                                                                                                                                                                                                                                                                                                                                                                                                                                                                                                                                                                                                                                                                          | 1                                                                                                                                                                                      | 0  |               |     |    |   |           |   |   |   |              |   |   |   |                    |   |   |   |                                |   |   |   |         |   |   |   |                                            |   |   |   |       |   |   |
| 5    | Ecstasy                                                                                                                                                                                                                                                                                                                                                                                                                                                                                                                                                                                                                                                                                                                                                                                 | 1                                                                                                                                                                                      | 0  |               |     |    |   |           |   |   |   |              |   |   |   |                    |   |   |   |                                |   |   |   |         |   |   |   |                                            |   |   |   |       |   |   |
| 6    | Inhalants (glue, paint, petrol, spray can)                                                                                                                                                                                                                                                                                                                                                                                                                                                                                                                                                                                                                                                                                                                                              | 1                                                                                                                                                                                      | 0  |               |     |    |   |           |   |   |   |              |   |   |   |                    |   |   |   |                                |   |   |   |         |   |   |   |                                            |   |   |   |       |   |   |
| 7    | Other                                                                                                                                                                                                                                                                                                                                                                                                                                                                                                                                                                                                                                                                                                                                                                                   | 1                                                                                                                                                                                      | 0  |               |     |    |   |           |   |   |   |              |   |   |   |                    |   |   |   |                                |   |   |   |         |   |   |   |                                            |   |   |   |       |   |   |



|      |                                                                          |                                                                                                            |
|------|--------------------------------------------------------------------------|------------------------------------------------------------------------------------------------------------|
| Q060 | In the past 3 months, did you inject any illicit drugs?                  | Heroin 1<br>Yama 2<br>Crystal, Ice (Methamphetamine) 3<br>Never injected any drug 4<br>Refuse to answer 99 |
| Q061 | In the past 3 months, did you have sex during/after using illicit drugs? | Heroin 1<br>Yama 2<br>Ice, Amphetamine 3<br>Never used drug before having sex 4<br>Refuse to answer 99     |

| SECTION 9. EXPOSURE TO INTERVENTION PROGRAMS |                                                                                       |                                                                                                                                                                                                  |                     |
|----------------------------------------------|---------------------------------------------------------------------------------------|--------------------------------------------------------------------------------------------------------------------------------------------------------------------------------------------------|---------------------|
| No.                                          | Questions and filters                                                                 | Coding categories                                                                                                                                                                                | Skip to             |
| Q062                                         | In the past 3 months, have you been reached by NGO staff delivering HIV services?     | No 0<br>Yes 1<br>Don't know 98<br>Refuse to answer 99                                                                                                                                            |                     |
| Q063                                         | In the past 3 months, what kind of services have you received (Check all that apply). | HIV/health education and/or materials 1<br>Condoms 2<br>Lubricants 3<br>VCCT/STI testing 4<br>Law support services 5<br>Other health services 6<br>Other (Specify.....) 7<br>Refuse to answer 99 |                     |
| Q064                                         | Do you have UIC card?                                                                 | Yes 1<br>No 0<br>Refuse to answer 99                                                                                                                                                             |                     |
| Q065                                         | In the past 12 months, how often did you visit MStyle/Srey Sros club(s)?              | ... times<br>Refuse to answer 99                                                                                                                                                                 |                     |
| Q066                                         | Have you used online services developed for people like you (e.g. Facebook, website)? | No 0<br>Yes 1<br>Refuse to answer 99                                                                                                                                                             | 0 -> stop interview |
| Q067                                         | Have you found any sexual partner on an Internet website or any online program?       | Never 0<br>Yes, always 1<br>Yes, sometimes 2<br>Yes, occasionally 3                                                                                                                              |                     |

|      |                                                                                               |                                                                                            |  |
|------|-----------------------------------------------------------------------------------------------|--------------------------------------------------------------------------------------------|--|
|      |                                                                                               | Refuse to answer 99                                                                        |  |
| Q068 | Have you accessed MStyle website in the past 6 months? (Attach the picture of MStyle webpage) | Never 0<br>Yes, always 1<br>Yes, sometimes 2<br>Yes, occasionally 3<br>Refuse to answer 99 |  |

["Thank you very much for answering these questions. Let us repeat that your answers are totally confidential and there is no way anyone will learn what you told us.]

For peer review only

# BMJ Open

## HIV prevalence and factors associated with HIV infection among transgender women in Cambodia: Results from a national integrated biological and behavioral survey.

|                                 |                                                                                                                                                                                                                                                                                                                                                                                                                                                                                                                                                                                                           |
|---------------------------------|-----------------------------------------------------------------------------------------------------------------------------------------------------------------------------------------------------------------------------------------------------------------------------------------------------------------------------------------------------------------------------------------------------------------------------------------------------------------------------------------------------------------------------------------------------------------------------------------------------------|
| Journal:                        | <i>BMJ Open</i>                                                                                                                                                                                                                                                                                                                                                                                                                                                                                                                                                                                           |
| Manuscript ID                   | bmjopen-2016-015390.R1                                                                                                                                                                                                                                                                                                                                                                                                                                                                                                                                                                                    |
| Article Type:                   | Research                                                                                                                                                                                                                                                                                                                                                                                                                                                                                                                                                                                                  |
| Date Submitted by the Author:   | 14-Mar-2017                                                                                                                                                                                                                                                                                                                                                                                                                                                                                                                                                                                               |
| Complete List of Authors:       | Chhim, Srean; FHI 360 Cambodia<br>Ngin, Chanrith; KHANA Center for Population Health Research<br>Chhoun, Pheak; KHANA Center for Population Health Research<br>Tuot, Sovannary; KHANA Center for Population Health Research<br>Ly, Cheaty; Population Services Khmer (PSK)<br>Mun, Phalkun; National Center for HIV/AIDS, Dermatology and STD (NCHADS)<br>Pal, Dyla; KHANA Center for Population Health Research<br>Macom, John; FHI 360<br>Dousset, Jean-Philippe ; FHI 360<br>Mburu, Gitau; Lancaster University, Division of Health Research<br>Yi, Siyan; KHANA Center for Population Health Research |
| <b>Primary Subject Heading</b>: | HIV/AIDS                                                                                                                                                                                                                                                                                                                                                                                                                                                                                                                                                                                                  |
| Secondary Subject Heading:      | Infectious diseases, Epidemiology, Public health                                                                                                                                                                                                                                                                                                                                                                                                                                                                                                                                                          |
| Keywords:                       | Transgender women, HIV infection, Risk factors, Prevention, Integrated Biological and Behavioral Survey, Cambodia                                                                                                                                                                                                                                                                                                                                                                                                                                                                                         |
|                                 |                                                                                                                                                                                                                                                                                                                                                                                                                                                                                                                                                                                                           |

SCHOLARONE™  
Manuscripts

1  
2  
3 1 **HIV prevalence and factors associated with HIV infection among transgender women in Cam-**  
4 **odia: Results from a national integrated biological and behavioral survey**  
5  
6  
7  
8

9 4 Chhim Srean,<sup>1</sup> Chanrith Ngin,<sup>2</sup> Pheak Chhoun,<sup>2</sup> Sovannary Tuot,<sup>2</sup> Cheaty Ly,<sup>3</sup> Phalkun Mun,<sup>4</sup>  
10  
11 5 Khondyla Pal<sup>2</sup>, John Macom<sup>5</sup>, Jean-Philippe Dousset<sup>1</sup>, Gitau Mburu<sup>6</sup>, Siyan Yi<sup>2,\*</sup>  
12  
13 6

14 7 <sup>1</sup> FHI 360, Phnom Penh, Cambodia

15 8 <sup>2</sup> KHANA Center for Population Health Research, Phnom Penh, Cambodia

16 9 <sup>3</sup> Population Services Khmer (PSK), Phnom Penh, Cambodia

17 10 <sup>4</sup> National Center for HIV/AIDS, Dermatology and STD (NCHADS), Phnom Penh, Cambodia

18 11 <sup>5</sup> FHI 360 Asia Pacific Regional Office, Bangkok, Thailand

19 12 <sup>6</sup> Division of Health Research, Lancaster University, Lancaster, UK

20  
21  
22 14 \* Correspondence to: Siyan Yi, No. 33, Street 71, Tonle Bassac, Chamkar Mon, Phnom Penh,  
23  
24 15 Cambodia Tel: +855-23-211-505 / Fax: +855-23-214-049 / Email: [siyan@doctor.com](mailto:siyan@doctor.com)  
25  
26  
27  
28  
29  
30  
31  
32  
33  
34  
35  
36  
37  
38  
39  
40  
41  
42  
43  
44  
45  
46  
47  
48  
49  
50  
51  
52  
53  
54  
55  
56  
57  
58  
59  
60

1  
2  
3 30 **ABSTRACT**

4  
5 31 **Objective:** To examine factors associated with HIV infection among transgender women in  
6  
7 32 Cambodia.

8  
9 33 **Design:** Cross-sectional study

10  
11 34 **Settings:** HIV high-burden sites including the capital city and 12 provinces

12  
13 35 **Participants:** This study included 1,375 sexually-active transgender women with a mean age of  
14  
15 36 25.9 years (SD= 7.1), recruited by using respondent driven sampling for structured question-  
16  
17 37 naire interviews and rapid finger-prick HIV testing.

18  
19 38 **Primary outcome measure:** HIV infection detected by using Determine™ antibody test.

20  
21 39 **Results:** HIV prevalence among this population was 5.9%. After adjustment for other covariates,  
22  
23 40 participants living in urban areas were twice as likely to be HIV infected as those living in rural  
24  
25 41 areas. Participants with primary education were 1.7 times as likely to be infected compared to  
26  
27 42 those with high school education. HIV infection increased with age; compared to those aged 18-  
28  
29 43 24, the odds of being HIV infected were twice as high among transgender women aged 25-34  
30  
31 44 and 2.8 times higher among those aged  $\geq 35$ . Self-injection of gender affirming hormones was  
32  
33 45 associated with a four-fold increase in the odds of HIV infection. A history of genital sores over  
34  
35 46 the previous 12 months increased the odds of HIV infection by three-fold. Transgender women  
36  
37 47 with stronger feminine identity, dressing as a woman all the time were twice as likely to be HIV  
38  
39 48 infected compared to those who did not dress as a woman all the time. Having never used  
40  
41 49 online services developed for transgender women in the past six months was also associated  
42  
43 50 with higher odds of being HIV infected.

44  
45 51 **Conclusions :** Transgender women in Cambodia are at high risk of HIV. To achieve the goal of  
46  
47 52 eliminating HIV in Cambodia, effective combination prevention strategies addressing the above  
48  
49 53 risk factors among transgender women should be strengthened.

50  
51 54  
52 55 **Key words:** Transgender women, HIV infection, Risk factors, Prevention, Integrated Biological  
53  
54 56 and Behavioral Survey, Cambodia.

55  
56 57

57  
58 58

59  
60 59

60  
61 60

1  
2  
3 59 **Strengths and limitations of this study**  
4  
5 60  
6

- 7 61     ▪ This is a rare and the second ever Integrated Biological and Behavioral Survey (IBBS)  
8           among transgender women—one of the most vulnerable and under-studied populations  
9 62           in Cambodia and globally.  
10 63  
11 64     ▪ This study covered HIV high-burden sites including the capital city and 12 provinces,  
12           thus providing more nationally generalizable results.  
13 65  
14 66     ▪ This study identified important risk factors for HIV infection among transgender women,  
15           which require being addressed in order to reduce HIV infection among this key popula-  
16 67           tion.  
17 68  
18 69     ▪ Limitations of the study included potential bias of self-reported measures, participant  
19 70           sampling, the cross-sectional nature of the data that limits causation inferences, and the  
20 71           backward selection of variables in multivariable analysis.  
21 72  
22 73  
23 74  
24  
25  
26  
27  
28  
29  
30  
31  
32  
33  
34  
35  
36  
37  
38  
39  
40  
41  
42  
43  
44  
45  
46  
47  
48  
49  
50  
51  
52  
53  
54  
55  
56  
57  
58  
59  
60

## 75 INTRODUCTION

76 Globally, transgender women are at high risk for HIV infection, and little is known about the  
77 burden of HIV infection and its related factors in this population. A 2013 systematic review  
78 showed that the global HIV prevalence among transgender women was 19%, with low- and  
79 middle-income countries having a slightly lower prevalence of 18% compared to 22% in high-  
80 income countries.<sup>1</sup> The probability of being infected with HIV among transgender women was  
81 approximately 49 times higher than among the general adult population.<sup>1</sup> Epidemiologically,  
82 transgender women share some HIV risk factors with other populations, such as ulcerative sex-  
83 ually transmitted infections (STIs),<sup>2,3</sup> multiple substance use, victimization, intimate partner vio-  
84 lence,<sup>4</sup> unprotected sex,<sup>5</sup> multiple sex partners,<sup>6</sup> and injecting drug use.<sup>5-7</sup>

85 However, transgender women encounter additional and unique biological, social, cul-  
86 tural, legal and economic issues, which increase their vulnerability to HIV. Transgender women  
87 are marginalized legally and economically through discriminative legislation and practice, which  
88 accelerates their vulnerability to HIV infection by confining their job options to sex work. Sex  
89 work in turn exacerbates their stigmatization and alienation,<sup>8</sup> and further increases their HIV  
90 risk.<sup>9,10</sup> Stigmatization and discrimination further increase the risk of HIV infection by prevent-  
91 ing transgender women from seeking essential health information and services.<sup>11</sup> Depression  
92 and low self-esteem, which are common psychological consequences of stigma, further weak-  
93 ens the bargaining power for condom use in sexual relationships, resulting in heightened vul-  
94 nerability to HIV infection.<sup>5,12-15</sup> Transgender women who have sex with men often engage in  
95 receptive anal intercourse, which increases their risk of HIV acquisition, compared to insertive  
96 sexual partners.<sup>2</sup> Syndemics of illicit drug use, abuse by family members, and mental health of-  
97 ten occur together;<sup>16</sup> and are often associated with less likelihood of transgender women to use  
98 condoms during sex with commercial partners.<sup>17</sup> In addition, the confluence of arbitrary ar-  
99 rests,<sup>18,19</sup> violence,<sup>16,20</sup> economic pressures,<sup>21</sup> and other social problems further aggravate  
100 mental health risks among transgender women, causing them to engage in risky sexual behav-  
101 iors.<sup>6,17</sup>

102 In Southeast Asia, a systematic review of studies from Indonesia, Thailand and Vietnam  
103 demonstrated that transgender women are particularly at high HIV risk, with an estimated HIV

1  
2  
3 104 prevalence of 26.1%, 12.2% and 6.7%, respectively.<sup>1</sup> In Cambodia, up to 2012, transgender  
4  
5 105 women were traditionally included in HIV prevention programs targeting men who have sex  
6  
7 106 with men (MSM). As a result, their unique needs were not reflected in HIV programs' goals.<sup>22</sup>  
8  
9 107 There was also a lack of transgender women-specific data to quantify the number reached by  
10  
11 108 outreach programs and services. In 2012, the first Integrated Biological and Behavioral Survey  
12  
13 109 (IBBS) that specifically included transgender women in Cambodia found an HIV prevalence of  
14  
15 110 4.2% among this population,<sup>22</sup> which was six times higher than the 0.7% prevalence among the  
16  
17 111 general adult population aged 15-45,<sup>23</sup> and about twice higher than the 2.1% among MSM.<sup>24</sup>  
18  
19 112 This 2012 study also found that older age (>35 years), residing in Siem Reap province (a major  
20  
21 113 tourist site), having sex during or after drug use, not using a condom during the last anal sex,  
22  
23 114 and low self-esteem were associated with HIV infection among transgender women.<sup>22</sup>

24 115 Recognizing the differences in HIV vulnerability and prevention needs between  
25  
26 116 transgender women and MSM, in 2013 the National Center for HIV/AIDS, Dermatology and STD  
27  
28 117 (NCHADS) separated these two populations in its revised Standard Operating Procedure (SOP)  
29  
30 118 known as Boosted Continuum of Prevention, Care and Treatment (B-CoPCT).<sup>25</sup> Transgender  
31  
32 119 women have since been considered a distinct at-risk group for HIV surveillance and programing.  
33  
34 120 The National B-CoPCT approach aims to increase the uptake of HIV testing and counseling (HTC)  
35  
36 121 and other related services, ensure the quality of outreach and strengthen service delivery to  
37  
38 122 meet specific needs of key populations, including transgender women, in-order to achieve  
39  
40 123 Cambodia's 3.0 goal (i.e. zero new HIV infection, zero discrimination, and zero AIDS-related  
41  
42 124 deaths) by 2020.

43 125 Three years following the first IBBS in 2012,<sup>22</sup> the TGIBBS-2016 was conducted between  
44  
45 126 December 2015 and February 2016 to explore the HIV prevalence and identify risk factors asso-  
46  
47 127 ciated with HIV infection among transgender women in Cambodia. The study findings will help  
48  
49 128 determine ways in which services and policies can be tailored for this key population.

50 129

## 52 130 **METHODS**

### 54 131 **Study sites**



1  
2  
3 132 Data collection was conducted in the capital city of Phnom Penh and 12 provinces namely Bat-  
4  
5 133 tambang, Banteay Meanchey, Kampong Cham, Kandal, Koh Kong, Kampong Chhnang, Kampong  
6  
7 134 Speu, Prey Veng, Preah Sihanouk, Siem Reap, Svay Rieng and Tbong Khmum. These sites were  
8  
9 135 purposively selected from the 23 HIV high-burden operational districts identified by NCHADS.<sup>26</sup>  
10  
11 136<sup>27</sup>

137

### 138 **Sample size and sampling procedures**

139 The sample size calculation was based on an assumption that HIV prevalence would have  
140 changed between the first and the current IBBS. The minimum sample size required for this  
141 study was 1,380, which would result in sufficient power to detect a priori significant difference  
142 in HIV prevalence, as expressed in the following null and alternative hypotheses. The hypothesis  
143 test was that of one-sample proportion in comparison to the null hypothesis.

144 The null hypothesis ( $H_0$ ): HIV prevalence among transgender women remains constant at  
145 4.2%, similar to that found in the 2012 IBBS.

146 The alternative hypothesis ( $H_a$ ): HIV prevalence among transgender women has decreased  
147 by 1.2% from 4.2% in 2012 to 3.0% in the present IBBS.

148

149 The sample size was calculated using the following formula and assumptions:

$$n = \frac{p_0q_0 \left( z_{1-\alpha} + z_{1-\beta} \sqrt{p_1q_1/p_0q_0} \right)^2}{(p_1 - p_0)^2}$$

150

151 ▪  $P_0$  = estimated proportion in  $H_0$  (In the most recent survey, HIV prevalence among TG  
152 women was 4.2% in 2012.)

153 ▪  $P_1$  = estimated proportion in  $H_a$  (The expected HIV prevalence among TG women in the  
154 current study is about 3.0 %)

155 ▪  $Z_{(1-\alpha)}$  = significance level at 5% in response to one-sided test (Z score = 1.645)

156 ▪  $Z(1-\beta)$  = power level of 80% (Z score = 0.83)

157 ▪ Refusal rate of 10%

158 ▪ Design effect is assumed to be one.

159

This sample size was stratified by study site. Roughly half of the estimated transgender women in each study site were recruited. However, in five provinces where the estimated number of transgender women was smaller than 100, all transgender women were recruited. Potential participants were included in the study if they: (1) were biologically male at birth and self-identified as a woman or third gender, (2) were Khmer-speaking, (3) were at least 18 years old at the time of screening, (4) reported having had sex with at least one man within the past 12 months and (5) were able and willing to provide an informed consent.

Among the 13 study sites, participant recruitment was conducted in 20 locations (six locations in Phnom Penh and 14 locations in the remaining provinces). The number of the selected locations was determined based on the required sample size in each study site. Participants were recruited through a Respondent Driven Sampling (RDS) method. First, four “seeds” (two seeds aged 18 to 24 and two seeds 25 or older) who were well connected with other transgender women in each location were selected by outreach workers from implementing partners (local NGOs) based in the selected locations. These seeds had to meet the above-mentioned eligibility criteria for participation and have an established and large social network consisting of 10 or more other transgender women in their given location. Eligibility to participate as a seed was determined by the leader of the data collection team, using a paper-based eligibility form.

Second, each seed was given a personal identity number (PIN) and enrolled in the study. Third, each seed was given three coupons and asked to refer three additional transgender women. US\$2 was given to each seed for a successful referral. Each seed was expected to extend to three to six “recruitment waves” in each location. If the initial seeds did not recruit participants, or if enrollment was halted because all recruitment chains had “dried up” (i.e. stopped recruiting), additional seeds were selected. In total, 80 seeds were selected by the outreach workers, and a total of 1,375 transgender women were enrolled in the study. Referred participants were initially screened by the data collectors for eligibility.

186

### 187 **Data collection training and procedures**

1  
2  
3 188 Data were collected by three teams; each team comprised of one field supervisor, five inter-  
4  
5 189 viewers, one lab technician and one counselor. Lab technicians and counselors were from the  
6  
7 190 Municipal or Provincial AIDS and STI Program of the study sites. Data collection teams were  
8  
9 191 trained for three days on study protocol, research ethics, interview techniques and data collec-  
10  
11 192 tion procedures provided by the principle investigators and research coordinators.

12  
13 193 To determine HIV prevalence, all participants received onsite rapid finger-prick testing.  
14  
15 194 Pre-test counseling was provided by qualified, well-trained counselors working for voluntary  
16  
17 195 confidential counseling and testing (VCCT) centers. Participants could receive their HIV-test re-  
18  
19 196 sult verbally after the questionnaire interview. A blood sample was obtained from each partici-  
20  
21 197 pant by a trained laboratory technician through finger-prick and tested for HIV using Deter-  
22  
23 198 mine™ test, in keeping with the national protocol.<sup>28</sup> Post-test counseling was provided for each  
24  
25 199 participant regardless of their HIV test result by the same counselor who conducted the pre-  
26  
27 200 test counseling in accordance with NCHADS HIV testing guidelines.<sup>28</sup> Participants who were HIV  
28  
29 201 reactive and did not know their HIV status were referred by the counselor for confirmatory  
30  
31 202 testing at the nearest VCCT center. The quality of HIV tests was monitored using quality control  
32  
33 203 samples. Discordant results between the screening and confirmatory tests were investigated to  
34  
35 204 elucidate potential causes and minimize potential erroneous results. In the case of human er-  
36  
37 205 ror, individuals performing screening tests were retrained before resuming their involvement in  
38  
39 206 the study.

40  
41 207 After HIV testing, the participant was interviewed by a well-trained interviewer using a  
42  
43 208 computer-assisted survey instrument (CASI). The questionnaire was set up in Qualtrics, a web-  
44  
45 209 based application, and run on an Android tablet. HIV testing and interviews were conducted in  
46  
47 210 the selected 20 locations including drop-in centers, private houses and offices of implementing  
48  
49 211 partners, depending on participants' convenience.

50  
51

### 213 **Questionnaire development and measures**

52  
53 214 The questionnaire was developed using standardized and validated tools adapted from TGIBBS-  
54  
55 215 2012,<sup>22</sup> FHI 360's guideline for Behavioral Surveillance Survey (BSS)<sup>29</sup> and NCHADS's Boosted-  
56  
57 216 CoPCT<sup>25</sup> to measure key variables related to the objectives of the study. The questionnaire was  
58  
59  
60

1  
2  
3 217 initially drafted in English and translated into Khmer, the national language of Cambodia. Con-  
4  
5 218 sultative meetings to improve the draft questionnaire were held with representatives of  
6  
7 219 transgender women, communities and NGOs working with transgender women, as well as re-  
8  
9 220 searchers and practitioners working on HIV and AIDS in Cambodia. The questionnaire was pre-  
10  
11 221 tested with 20 transgender women in Phnom Penh and finalized based on findings.

12  
13 222 The questionnaire collected information on socio-economic characteristics, transgender  
14  
15 223 identity and related experiences, sexual behaviors and condom use with different types of sex-  
16  
17 224 ual partners, HIV/STI screening and care seeking behaviors, substance use and exposure to HIV  
18  
19 225 programs. For details of the questionnaire, please see Supplementary File 1.

20 226

### 21 227 **Data analyses**

22 228 HIV prevalence was calculated by dividing the total number of participants with HIV reactive  
23  
24 229 test results with the total number of participants. To examine the associated factors of HIV in-  
25  
26 230 fection, we conducted both bivariate and multivariable analyses. In the bivariate analyses, we  
27  
28 231 compared all characteristics and behavioral variables of participants with a reactive test result  
29  
30 232 to those of participants with a non-reactive test result. Among participants who tested HIV pos-  
31  
32 233 itive, additional analyses were conducted to assess whether there was a significant difference in  
33  
34 234 sexual behaviors of those who were aware of their HIV-positive status and of those who were  
35  
36 235 not. Chi-square test or Fisher's exact test (for an expected cell value of  $\leq 5$ ) was used for cate-  
37  
38 236 gorical variables, while Student's *t*-test was used for continuous variables. To facilitate the  
39  
40 237 model, some continuous variables, such as age were transformed to categorical variables. A  
41  
42 238 multivariable logistic regression model was constructed to examine independent factors associ-  
43  
44 239 ated with HIV infection. Variables with a significance level of  $p < 0.05$  in the bivariate analyses  
45  
46 240 were simultaneously included in the model. Backward elimination method was then used to  
47  
48 241 eliminate variables with the highest *p*-value one-by-one from the model. STATA Version 12.0  
49  
50 242 for Windows (Stata Corp, TX, USA) was used to conduct the data analyses.

51 243

### 52 244 **ETHICAL STATEMENT**

1  
2  
3 245 Participation in this study was voluntary, and a written informed consent was obtained from  
4  
5 246 each study participant after a detailed description of the study objective and procedures was  
6  
7 247 explained to them. Participants were informed that they could stop responding to questions  
8  
9 248 and discontinue their participation at any time. Interviews were conducted at a private place,  
10  
11 249 and confidentiality was enhanced by assigning a unique and anonymous code to each partici-  
12  
13 250 pant. No personal identifiers were contained in the questionnaires or dataset. The study proto-  
14  
15 251 col was approved by the National Ethics Committee for Health Research (NECHR) of the Minis-  
16  
17 252 try of Health, Cambodia (No. 420 NECHR) and FHI 360's Protection of Human Subjects Commit-  
18  
19 253 tee (PHSC No. 713897).

20 254

## 21 255 **RESULTS**

### 22 256 **HIV prevalence**

23  
24  
25  
26 257 Of 1,375 participants tested, 81 (5.9%) had an HIV reactive test; of whom, 42 (52%) were not  
27  
28 258 aware of their HIV status prior to the study. Out of the 39 cases who already knew their status,  
29  
30 259 37 (94.9%) were currently on HIV treatment, with the other two reporting having dropped out  
31  
32 260 of the treatment.

33 261

### 34 262 **Socio-demographic characteristics**

35  
36  
37 263 As shown in Table 1, the majority of the participants (83.4%) were recruited from urban com-  
38  
39 264 munities; 53.0% were younger than 25 years old and 97.2% had never been married. More than  
40  
41 265 two-thirds of participants (68.6%) had completed high school, and 9.1% had a higher education.  
42  
43 266 The most common main occupations reported by the participants were hair dress-  
44  
45 267 ers/beauticians (35.1%), laborers/farmers (17.5%) and entertainment workers (14.8%). More  
46  
47 268 than one-third of participants (38.6%) reported an average monthly income in the past six  
48  
49 269 months of US\$ 100-199, while 16.5% reported it to be more than US\$ 300. Regarding gender  
50  
51 270 identity, 42.2% identified themselves as female, while 57.2% identified themselves as third  
52  
53 271 gender. Almost half (48.0%) of the participants reported dressing as a woman all the time; 45%  
54  
55 272 ever used hormone/non-hormone substance; and 14.0% ever injected hormones.

56  
57  
58  
59  
60

273 HIV prevalence was significantly higher among participants living in urban communities  
 274 compared to participants living in rural communities (6.5% vs. 2.6%;  $p= 0.02$ ). The HIV preva-  
 275 lence was also significantly different by age group: 3.0% of participants in the age group of 18-  
 276 24, 8.2% in 25-34, 13.1% in 35-44 and 11.4% in 45 or older ( $p< 0.001$ ). HIV prevalence was also  
 277 significantly higher among those who never attended school or dropped out of primary school  
 278 when compared to those who at least attended high school or higher (10.4% vs. 8.0%;  $p=$   
 279  $<0.001$ ). In addition, HIV prevalence was significantly higher among transgender women who  
 280 were NGO staff (mainly HIV focused NGOs) (20.6%) and those who were unemployed (9.4%) ( $p=$   
 281 0.03). HIV prevalence was significantly higher among transgender women who reported dress-  
 282 ing as women all the time (8.5% vs. 3.5%,  $p= 0.001$ ), among those who ever used female hor-  
 283 mones (8.1% vs. 4.1%,  $p= 0.02$ ) and among those who ever injected hormones (9.1% vs. 5.2%,  
 284  $p= 0.002$ ). Moreover, HIV prevalence was significantly higher among transgender women who  
 285 reported never using online services developed specifically for MSM or transgender women,  
 286 such as Facebook group pages or various websites (9.5% vs. 3.9%,  $p< 0.001$ ).

287

288 **Table 1** Comparison of socio-demographic, gender identity and hormone use characteristics of  
 289 transgender women with and without a reactive HIV test

| Socio-demographics, gender identity<br>and hormone use | Total<br>( <i>n</i> = 1375) | HIV test result              |                                    | <i>P</i> -value* |
|--------------------------------------------------------|-----------------------------|------------------------------|------------------------------------|------------------|
|                                                        |                             | Reactive<br>( <i>n</i> = 81) | Non-reactive<br>( <i>n</i> = 1294) |                  |
|                                                        | <i>n</i> (%)                | <i>n</i> (%)                 | <i>n</i> (%)                       |                  |
| Community type                                         |                             |                              |                                    |                  |
| Urban                                                  | 1146 (83.4)                 | 75 (6.5)                     | 1071 (93.5)                        | 0.02             |
| Rural                                                  | 229 (16.6)                  | 6 (2.6)                      | 223 (97.4)                         |                  |
| Age in years                                           |                             |                              |                                    |                  |
| 18- 24                                                 | 729 (53.0)                  | 22 (3.0)                     | 707 (97.0)                         | <0.001           |

|                                           |             |           |             |        |
|-------------------------------------------|-------------|-----------|-------------|--------|
| 25-34                                     | 503 (36.6)  | 41 (8.2)  | 462 (91.8)  |        |
| ≥35                                       | 143 (10.4)  | 18 (12.6) | 125 (87.4)  |        |
| Current marital status                    |             |           |             |        |
| Married                                   | 7 (0.5)     | 0 (0.0)   | 7 (100)     | 0.47   |
| Widowed/divorced/separated                | 18 (1.3)    | 1 (5.6)   | 17 (94.4)   |        |
| Never married                             | 1334 (97.2) | 78 (5.9)  | 1256 (94.1) |        |
| Refused to answer                         | 16 (1.2)    | 2 (15.4)  | 11 (84.6)   |        |
| Years of formal education completed       |             |           |             |        |
| Primary (0-6 years)                       | 307 (22.3)  | 32 (10.4) | 275 (89.6)  | <0.001 |
| High school or higher (>7 years)          | 1068 (77.7) | 49 (4.6)  | 1019 (95.4) |        |
| Main occupation                           |             |           |             |        |
| Unemployed                                | 64 (4.7)    | 6 (9.4)   | 58 (90.6)   | 0.03   |
| Hair dresser/beautician                   | 482 (35.1)  | 24 (5.0)  | 458 (95.0)  |        |
| Office worker                             | 50 (3.6)    | 3 (6.0)   | 47 (94.0)   |        |
| Labor/farmer                              | 241 (17.5)  | 15 (6.2)  | 226 (93.8)  |        |
| Seller                                    | 149 (10.8)  | 10 (6.7)  | 139 (93.3)  |        |
| Entertainment Worker                      | 203 (14.8)  | 10 (4.9)  | 193 (95.1)  |        |
| Student                                   | 108 (7.9)   | 1 (0.9)   | 107 (99.1)  |        |
| NGO staff                                 | 34 (2.5)    | 7 (20.6)  | 27 (79.4)   |        |
| Other                                     | 44 (3.2)    | 5 (11.4)  | 39 (88.6)   |        |
| Monthly income in the past 6 months (USD) |             |           |             |        |

|    |                                                                         |              |          |             |        |
|----|-------------------------------------------------------------------------|--------------|----------|-------------|--------|
| 1  |                                                                         |              |          |             |        |
| 2  |                                                                         |              |          |             |        |
| 3  |                                                                         |              |          |             |        |
| 4  | < 100                                                                   | 351 (25.6)   | 22 (6.3) | 329 (93.7)  | 0.70   |
| 5  |                                                                         |              |          |             |        |
| 6  | 100-199                                                                 | 530 (38.6)   | 29 (5.5) | 501 (94.5)  |        |
| 7  |                                                                         |              |          |             |        |
| 8  |                                                                         |              |          |             |        |
| 9  | 200-299                                                                 | 266 (19.3)   | 19 (7.1) | 247 (92.9)  |        |
| 10 |                                                                         |              |          |             |        |
| 11 | ≥300                                                                    | 226 (16.5)   | 11 (4.9) | 215 (95.1)  |        |
| 12 |                                                                         |              |          |             |        |
| 13 |                                                                         |              |          |             |        |
| 14 | Gender identity (self-identified)                                       |              |          |             |        |
| 15 |                                                                         |              |          |             |        |
| 16 | Female                                                                  | 580 (42.2)   | 29 (5.0) | 551 (95.0)  | 0.35   |
| 17 |                                                                         |              |          |             |        |
| 18 | Third gender                                                            | 786 (57.2)   | 52 (6.6) | 734 (93.4)  |        |
| 19 |                                                                         |              |          |             |        |
| 20 | Uncertain                                                               | 8 (0.6)      | 0 (0.0)  | 8 (100)     |        |
| 21 |                                                                         |              |          |             |        |
| 22 |                                                                         |              |          |             |        |
| 23 |                                                                         |              |          |             |        |
| 24 | Frequency of dressing as a woman                                        |              |          |             |        |
| 25 |                                                                         |              |          |             |        |
| 26 | All the time                                                            | 660 (48.0)   | 56 (8.5) | 604 (91.5)  | 0.001  |
| 27 |                                                                         |              |          |             |        |
| 28 | Not all the time                                                        | 715 (52.0)   | 25 (3.5) | 689 (96.5)  |        |
| 29 |                                                                         |              |          |             |        |
| 30 |                                                                         |              |          |             |        |
| 31 |                                                                         |              |          |             |        |
| 32 | Ever injected hormones                                                  |              |          |             |        |
| 33 |                                                                         |              |          |             |        |
| 34 | No                                                                      | 1123 (81.7)  | 58 (5.2) | 1065 (94.8) | 0.02   |
| 35 |                                                                         |              |          |             |        |
| 36 | Yes                                                                     | 252 (18.3)   | 23 (9.1) | 229 (90.9)  |        |
| 37 |                                                                         |              |          |             |        |
| 38 |                                                                         |              |          |             |        |
| 39 | Ever self-injected hormones                                             |              |          |             |        |
| 40 |                                                                         |              |          |             |        |
| 41 | No                                                                      | 1,358 (98.8) | 77 (5.7) | 1281 (94.3) | 0.002  |
| 42 |                                                                         |              |          |             |        |
| 43 | Yes                                                                     | 17 (1.2)     | 4 (25.5) | 13 (76.5)   |        |
| 44 |                                                                         |              |          |             |        |
| 45 |                                                                         |              |          |             |        |
| 46 |                                                                         |              |          |             |        |
| 47 | Ever shared needles when injecting hormones/beauty substances           |              |          |             |        |
| 48 |                                                                         |              |          |             |        |
| 49 | No                                                                      | 1355 (98.5)  | 78 (5.8) | 550 (94.2)  | 0.33   |
| 50 |                                                                         |              |          |             |        |
| 51 | Yes                                                                     | 20 (3.2)     | 2 (10.0) | 18 (90.0)   |        |
| 52 |                                                                         |              |          |             |        |
| 53 |                                                                         |              |          |             |        |
| 54 |                                                                         |              |          |             |        |
| 55 | Ever used online services developed for MSM/TG (e.g. Facebook, website) |              |          |             |        |
| 56 |                                                                         |              |          |             |        |
| 57 | No                                                                      | 483 (35.1)   | 46 (9.5) | 437 (90.5)  | <0.001 |
| 58 |                                                                         |              |          |             |        |
| 59 |                                                                         |              |          |             |        |
| 60 |                                                                         |              |          |             |        |



Yes 892 (64.9) 35 (3.9) 857 (96.1)

290 *Abbreviations: HIV, human immunodeficiency virus; USD, United States dollar.*

291 *\*Chi-square or Fisher's exact test was used as appropriate.*

292

### 293 Sexual behaviors

294 Sexual behaviors among transgender women with reactive and non-reactive HIV test are shown  
 295 in Table 2. An overwhelming majority of study participants (87.5%) reported only having had  
 296 receptive anal sex in the past 12 months. Of the total, 86.0% reported having had anal sex with  
 297 at least one man within the previous three months, with the median number of male sex part-  
 298 ners in the past three months being three (IQR 1-9). Of those who were sexually active with  
 299 men in the past three months, 61.9% reported having used a condom at last sex with a man.

300 A total of 94.8% of participants who had anal sex in the prior three months reported  
 301 having at least one non-transactional male sex partner within the past three months; of which,  
 302 62.1% reported always using condoms with their non-transactional male sex partners. Of partic-  
 303 ipants who had sex in the past three months, 41.8% reported having sex with at least one man  
 304 in exchange for money or gift; of whom 60.0% reported always using condoms with the part-  
 305 ners.

306 Table 2 also shows that HIV prevalence was significantly higher among participants who  
 307 reported having had anal sex with a man in the past three months (6.5% vs. 2.1%,  $p= 0.02$ ) and  
 308 among those who reported having had sex with at least one man in exchange for money or gift  
 309 in the prior three months (8.1% vs. 5.4%,  $p= 0.04$ ) compared to participants who did not report  
 310 these sexual behaviors.

311

312 **Table 2** Comparisons of sexual behaviors among transgender women with reactive and non-  
 313 reactive HIV test

| Sexual behaviors | Total<br>( <i>n</i> = 1375) | HIV test result              |                                    | <i>P</i> -value* |
|------------------|-----------------------------|------------------------------|------------------------------------|------------------|
|                  |                             | Reactive<br>( <i>n</i> = 81) | Non-reactive<br>( <i>n</i> = 1294) |                  |
|                  | <i>n</i> (%)                | <i>n</i> (%)                 | <i>n</i> (%)                       |                  |
|                  |                             |                              |                                    |                  |

## Role in anal sex with a man (past 12 months)

|           |             |          |             |      |
|-----------|-------------|----------|-------------|------|
| Insertive | 29 (2.2)    | 1 (3.5)  | 28 (96.5)   | 0.73 |
| Receptive | 1145 (87.5) | 72 (6.3) | 1073 (93.7) |      |
| Both      | 135 (10.3)  | 7 (5.2)  | 128 (94.8)  |      |

## Had anal sex with a man (past 3 months)

|     |             |          |             |      |
|-----|-------------|----------|-------------|------|
| No  | 192 (14.0)  | 4 (2.1)  | 188 (97.9)  | 0.02 |
| Yes | 1183 (86.0) | 77 (6.5) | 1106 (93.5) |      |

## Number of male sexual partners (past 3 months)

|    |            |          |            |      |
|----|------------|----------|------------|------|
| <2 | 512 (37.3) | 24 (4.7) | 488 (95.3) | 0.14 |
| ≥2 | 861 (62.7) | 57 (6.6) | 804 (93.4) |      |

## Used a condom at last sex (past 3 months)

|     |            |          |            |      |
|-----|------------|----------|------------|------|
| No  | 451 (38.1) | 27 (6.0) | 423 (94.0) | 0.57 |
| Yes | 732 (61.9) | 50 (6.8) | 682 (93.2) |      |

## Had anal sex with a man, not in exchange for money or gift (past 3 months)

|     |             |          |             |      |
|-----|-------------|----------|-------------|------|
| No  | 61 (5.2)    | 5 (8.2)  | 56 (91.8)   | 0.37 |
| Yes | 1122 (94.8) | 72 (6.4) | 1050 (93.6) |      |

## Number of male sexual partner, not in exchange for money or gift (past 3 months)

|     |            |          |            |      |
|-----|------------|----------|------------|------|
| < 2 | 357 (31.9) | 24 (6.7) | 333 (93.3) | 0.78 |
| ≥2  | 763 (68.1) | 48 (6.3) | 715 (93.7) |      |

## Condom use with male sexual partner not in exchange for money or gift (past 3 months)

|            |            |          |            |      |
|------------|------------|----------|------------|------|
| Not always | 697 (62.1) | 50 (7.2) | 647 (92.8) | 0.19 |
|------------|------------|----------|------------|------|

|                                                                                    |            |          |            |      |
|------------------------------------------------------------------------------------|------------|----------|------------|------|
| Always                                                                             | 425 (37.9) | 22 (5.2) | 403 (94.8) |      |
| Had anal sex with a man in exchange for money or gift (past 3 months)              |            |          |            |      |
| No                                                                                 | 688 (58.2) | 37 (5.4) | 651 (94.6) | 0.04 |
| Yes                                                                                | 495 (41.8) | 40 (8.1) | 455 (91.9) |      |
| Number male sexual partners in exchange for money/gifts (past 3 months)            |            |          |            |      |
| < 2                                                                                | 161 (32.5) | 12 (7.5) | 149 (92.6) | 0.72 |
| ≥2                                                                                 | 334 (67.5) | 28 (8.4) | 306 (91.6) |      |
| Condom use with male sexual partner in exchange for money or gifts (past 3 months) |            |          |            |      |
| Not always                                                                         | 164 (40.0) | 12 (7.3) | 152 (92.7) | 0.56 |
| Always                                                                             | 246 (60.0) | 22 (8.9) | 224 (91.1) |      |

314 *Abbreviation: HIV, human immunodeficiency virus.*

315 *\*Chi-square test or Fisher's exact test was used as appropriate.*

### 317 **Sexual behaviors and awareness of HIV status**

318 Among the participants who had HIV reactive tests, additional analyses were conducted to see  
 319 if there were differences in sexual behaviors among those who self-reported a positive status  
 320 and those who did not. Participants who did not report or were unaware of their positive status  
 321 were significantly less likely to report using a condom at last sexual intercourse (52.4% vs.  
 322 79.0%,  $p=0.01$ ). No other significant differences were found.

### 324 **Sexually transmitted infections (STIs)**

Overall, 14.0% of participants reported having had at least one STI symptom in the past 12 months. Anal and perianal symptoms were most commonly reported (6.1%). As shown in Table 3, HIV prevalence was significantly higher among participants who reported having had an STI symptom compared to that among participants who did not have an STI symptom in the past 12 months (11.4% vs. 5.0%;  $p < 0.001$ ). HIV prevalence was also significantly higher among participants who reported having had an ulceration or sore in the genital area in the past 12 months compared to that among participants who did not have it (15.2% vs. 5.6%;  $p < 0.001$ ).

**Table 3** Comparisons of STI symptoms among transgender women with reactive and non-reactive HIV test

| STI symptoms                                             | Total<br>( <i>n</i> = 1375) | HIV test result              |                                    | P-value* |
|----------------------------------------------------------|-----------------------------|------------------------------|------------------------------------|----------|
|                                                          |                             | Reactive<br>( <i>n</i> = 81) | Non-reactive<br>( <i>n</i> = 1294) |          |
|                                                          | n (%)                       | n (%)                        | n (%)                              |          |
| Had experienced any STI symptom (past 12 months)         |                             |                              |                                    |          |
| No                                                       | 1182 (86.0)                 | 59 (5.0)                     | 1123 (95.0)                        | <0.001   |
| Yes                                                      | 193 (14.0)                  | 22 (11.4)                    | 171 (88.6)                         |          |
| Ulceration or sores around the genitals (past 12 months) |                             |                              |                                    |          |
| No                                                       | 1329 (96.7)                 | 74 (5.6)                     | 1255(94.4)                         | <0.001   |
| Yes                                                      | 46 (3.4)                    | 7 (15.2)                     | 39 (84.8)                          |          |
| Swelling around the genitals (past 12 months)            |                             |                              |                                    |          |
| No                                                       | 1359 (98.8)                 | 80 (5.9)                     | 1279 (94.1)                        | 1.000    |
| Yes                                                      | 16 (1.2)                    | 1 (6.3)                      | 15 (93.7)                          |          |
| Abnormal urethral discharge (past 12 months)             |                             |                              |                                    |          |

|     |             |          |            |      |
|-----|-------------|----------|------------|------|
| No  | 1339 (97.4) | 77 (5.8) | 1262(94.2) | 0.16 |
| Yes | 36 (2.6)    | 4 (11.1) | 32 (88.9)  |      |

#### STI symptoms around the anus (past 12 months)

|     |             |          |             |      |
|-----|-------------|----------|-------------|------|
| No  | 1291 (93.9) | 73 (5.6) | 1218 (94.4) | 0.15 |
| Yes | 84 (6.1)    | 8 (9.52) | 76 (90.48)  |      |

#### STI symptoms in the mouth or throat (past 12 months)

|     |             |           |             |      |
|-----|-------------|-----------|-------------|------|
| No  | 1336 (97.2) | 76 (5.7)  | 1260 (94.3) | 0.07 |
| Yes | 39 (2.8)    | 5 (12.82) | 34 (87.18)  |      |

335 *Abbreviations: HIV, human immunodeficiency virus; STI, sexually transmitted infections.*

336 *\*Chi-square or Fisher's exact test was used as appropriate.*

337

#### 338 **Substance use**

339 As shown in Table 5, the majority (75.9%) of participants reported drinking at least one can of  
 340 beer or a glass of wine in the past 3 months, while 10.1% reported using amphetamine-type  
 341 stimulants (Yama, Crystal Ice, Ecstasy), and 0.9% reported using other drugs (marijuana, heroin,  
 342 etc.) in the previous 12 months. Of total, 1.5% reported having injected any illicit drugs in the  
 343 past three months.

344 Table 4 also shows that HIV prevalence was significantly higher among participants who  
 345 did not drink alcohol when compared to that among participants who reported drinking at least  
 346 one can of beer or a glass of wine in the past three months (8.5% vs. 5.1%;  $p= 0.02$ ). Moreover,  
 347 HIV prevalence was significantly higher among participants who reported injecting any illicit  
 348 drugs in the past three months compared to participants who did not (15.0% vs. 5.8%,  $p= 0.01$ ).

349

350 **Table 4** Comparisons of substance use among transgender women with reactive and non-  
 351 reactive HIV test

352

| Substance use                                                          | Total<br>(n= 1375) | HIV test result     |                           | P-value* |
|------------------------------------------------------------------------|--------------------|---------------------|---------------------------|----------|
|                                                                        |                    | Reactive<br>(n= 81) | Non-reactive<br>(n= 1294) |          |
|                                                                        | n (%)              | n (%)               | n (%)                     |          |
| Drank at least one can of beer or glass of wine in the past 3 months   |                    |                     |                           |          |
| No                                                                     | 331 (24.1)         | 28 (8.5)            | 303 (91.5)                | 0.02     |
| Yes                                                                    | 1042 (75.9)        | 53 (5.1)            | 989 (94.9)                |          |
| Frequency of having more than 5 drinks in one day in the past 3 months |                    |                     |                           |          |
| Never more than five drinks                                            | 336 (24.4)         | 28 (8.3)            | 308 (91.7)                | 0.17     |
| Less than once a month                                                 | 771 (56.1)         | 40 (5.2)            | 731 (94.8)                |          |
| 1-3 times a week                                                       | 157 (11.4)         | 9 (5.7)             | 148 (94.3)                |          |
| 4 or more times a week                                                 | 111 (8.1)          | 4 (3.6)             | 107 (96.4)                |          |
| Used illicit drugs in the past 12 months                               |                    |                     |                           |          |
| Never                                                                  | 1224 (89.0)        | 72(5.9)             | 1152 (94.1)               | 0.74     |
| Yes, ATS (yama, crystal ice, ecstasy)                                  | 139 (10.1)         | 8 (5.8)             | 131 (94.2)                |          |
| Other (marijuana, heroin, etc.)                                        | 12 (0.9)           | 1 (8.3)             | 11 (91.7)                 |          |
| Injected any illicit drugs in the past 3 months                        |                    |                     |                           |          |
| No                                                                     | 1355 (98.6)        | 78 (5.8)            | 1277 (94.2)               | 0.01     |
| Yes                                                                    | 20 (1.5)           | 3 (15.0)            | 17 (85.0)                 |          |
| Had sex during/after using illicit drugs in the past 3 months          |                    |                     |                           |          |
| No                                                                     | 1286 (93.5)        | 76 (5.9)            | 1210 (94.1)               | 1.00     |

Yes 89 (6.5) 5 (5.6) 84 (94.4)

353 *Abbreviation: ATS, amphetamine-type stimulant; HIV, human immunodeficiency virus.*

354 *\*Chi-square or Fisher's exact test was used as appropriate.*

### 356 **Factors associated with HIV infection**

357 Table 5 presents independent factors associated with HIV infection in multivariable logistic re-  
 358 gression analyses. After adjustment for other covariates, participants living in urban areas were  
 359 twice as likely to be HIV infected as those living in rural areas (AOR= 2.7, 95% CI= 1.1-6.5). Par-  
 360 ticipants with primary education were 1.7 times as likely to be infected compared to those with  
 361 high school education (AOR=1.7, 95% CI= 1.0-2.9). HIV infection increased with age; compared  
 362 to those aged 18-24, the odds of being HIV infected were twice as high among transgender  
 363 women aged 25-34 (AOR= 2.1, 95% CI= 1.2-3.6) and 2.8 times higher among those aged  $\geq 35$   
 364 (AOR= 2.8, 95% CI= 1.3-6.1). Self-injection of gender affirming hormones was associated with a  
 365 four-fold increase in the odds of HIV infection (AOR= 4.4, 95% CI= 1.1-17.3). A history of genital  
 366 sores over the previous 12 months increased the odds of HIV infection by three-fold (AOR= 3.0,  
 367 95% CI= 1.2-7.8). Transgender women with stronger feminine identity, dressing as a woman all  
 368 the time were twice as likely to be HIV infected compared to those who did not dress as a  
 369 woman all the time (AOR= 2.1, 95% CI= 1.2-3.8). Having never used online services developed  
 370 for transgender women in the past six months was also associated with higher odds of being  
 371 HIV infected (AOR= 1.9, 95% CI= 1.2-3.2).

372  
 373 **Table 5** Factors associated with HIV infection in multivariate logistic regression model

| Variables in the final model | AOR (95% CI)  | P-value |
|------------------------------|---------------|---------|
| Community type               |               |         |
| Rural                        | Reference     |         |
| Urban                        | 2.7 (1.1-6.5) | 0.03    |
| Formal education attained    |               |         |

|                                                                                     |                |      |
|-------------------------------------------------------------------------------------|----------------|------|
| Primary (0–6 years)                                                                 | 1.7 (1.1-2.9)  | 0.04 |
| High school or higher (≥7)                                                          | Reference      |      |
| Age in years                                                                        |                |      |
| <25                                                                                 | Reference      |      |
| 25-34                                                                               | 2.1 (1.2-3.6)  | 0.01 |
| ≥35                                                                                 | 2.6 (1.3-5.4)  | 0.01 |
| Frequency of express and/or dressing as a woman                                     |                |      |
| Not all the time                                                                    | Reference      |      |
| All the time                                                                        | 2.1 (1.2-3.8)  | 0.01 |
| Ever self-injected hormone                                                          |                |      |
| No                                                                                  | Reference      |      |
| Yes                                                                                 | 4.4 (1.1-17.3) | 0.03 |
| Ulcerations or sores in the genital area in the past 12 months                      |                |      |
| No                                                                                  | Reference      |      |
| Yes                                                                                 | 3.0 (1.2-7.8)  | 0.02 |
| Used online services developed MSM/TG in the past 6 months (e.g. Facebook, website) |                |      |
| No                                                                                  | 1.9 (1.2-3.2)  | 0.01 |
| Yes                                                                                 | Reference      |      |

374 *Abbreviations: AOR, adjusted odds ratio; CI, confidence interval; HIV, human immunodeficiency virus.*

375 *\*Variables in the table were the ones that remained statistically significant after several steps of model*

376 *fitting.*

377



1  
2  
3 378 **DISCUSSION**  
4

5 379 This study reveals an HIV prevalence of 5.9% among transgender women in Cambodia. This  
6  
7 380 prevalence was about 20 times higher than the 0.3% among women attending antenatal care  
8  
9 381 clinics in 2014 who represent the general adult population aged 15-45,<sup>30</sup> and about 2.5 times  
10  
11 382 higher than the 2.3% among MSM in 2014.<sup>26</sup> This observed prevalence emphasizes that  
12  
13 383 transgender women in Cambodia are at high risk of HIV, and is consistent with global literature  
14  
15 384 regarding the high burden of HIV among this transgender population.<sup>1</sup>

16  
17 385 Although statistically non-significant ( $p= 0.13$ ), the prevalence found in this study was  
18  
19 386 higher than the prevalence of 4.2% reported in the smaller ( $n= 891$ ) TGIBBS conducted in  
20  
21 387 2012<sup>22</sup> and was therefore contrary to our hypothesized expectations of reduction in HIV preva-  
22  
23 388 lence among this population. Recent progress in Cambodia, where 73% of all estimated HIV  
24  
25 389 positive people or 93% of those who have been aware of their positive status are in care,<sup>31</sup> had  
26  
27 390 prompted us to hypothesize the lower prevalence. Although we have no concrete evidence re-  
28  
29 391 garding the non-significant increase of HIV prevalence, we suggest that it may be related to the  
30  
31 392 sampling variation in the two surveys. The previous study recruited participants only from the  
32  
33 393 capital city and five provinces (Phnom Penh, Battambang, Banteay Meanchey, Kampong Cham,  
34  
35 394 Siem Reap and Preah Sihanouk),<sup>22</sup> whereas our study expanded to additional eight provinces.

36 395 More than half (52%) of those who had HIV reactive tests reported that they had never  
37  
38 396 learned about their HIV positive status before they participated in the study. We believe that  
39  
40 397 this self-reporting of the HIV status is realistic. Since we were concerned that those who were  
41  
42 398 already aware of their HIV status may be unwilling to report their status, we decided to use  
43  
44 399 well-trained counselors who all were from the government's Voluntary Confidential Counseling  
45  
46 400 and Testing (VCCT) centers. These counselors had many years of experience in providing VCCT  
47  
48 401 services and were better equipped to cope with difficult situations. In Cambodia, we believe  
49  
50 402 people are more likely to trust their counselors, as opposed to interviewers. However, as in all  
51  
52 403 self-reported measures, the potential for response bias cannot be entirely ruled out.

53 404 This study also reports important findings related to factors associated with HIV infec-  
54  
55 405 tion among transgender women in Cambodia. First, the HIV prevalence among transgender  
56  
57 406 women residing in urban communities was twice as high when compared to that among  
58  
59  
60

1  
2  
3 407 transgender women living in rural communities. This finding is similar to that in a previous  
4  
5 408 study that found a higher HIV prevalence in transgender women living in urban areas of Siem  
6  
7 409 Reap and Phnom Penh, compared to that among transgender women living in other provinc-  
8  
9 410 es.<sup>22</sup> Findings from our study suggest that these differences may not necessarily be attributable  
10  
11 411 to common sexual risk practices. The mean number of sexual partners (8.4 vs. 7.9;  $p= 0.70$ ) and  
12  
13 412 the mean number of male commercial sexual partners (0.7 vs. 0.7;  $p= 0.48$ ) in the past three  
14  
15 413 months among transgender women living in urban and rural communities were not significantly  
16  
17 414 different. In addition, the rates of inconsistent condom use with male non-commercial sexual  
18  
19 415 partners in the past three months were also similar in the two groups (58.0% vs. 62%;  $p= 0.32$ ).

20 416         Given the failure of sexual risk behaviors to sufficiently account for the difference in HIV  
21  
22 417 prevalence, these data suggest that a higher HIV prevalence among sexual partners of  
23  
24 418 transgender women in urban communities may possibly explain the higher probability of urban  
25  
26 419 transgender women to get infected, although this may not be stated with certainty. This is par-  
27  
28 420 ticularly relevant given that previous studies among all transgender women found a higher  
29  
30 421 prevalence of HIV in urban areas.<sup>22</sup> Studies among MSM in Cambodia have also found a higher  
31  
32 422 prevalence of HIV in urban areas.<sup>24 32</sup> In addition, a recent national sentinel survey among  
33  
34 423 women attending antenatal care clinics found that HIV prevalence among women in urban are-  
35  
36 424 as was consistently high,<sup>30</sup> implying that HIV prevalence in urban areas among most popula-  
37  
38 425 tions, who potentially include transgender women and their partners, is high. It is also possible  
39  
40 426 that transgender population in urban communities face unique or additional risks compared to  
41  
42 427 other members of this population in rural areas,<sup>22</sup> which could also contribute to the difference  
43  
44 428 in HIV prevalence between urban and rural communities. Still, it is possible that those who knew  
45  
46 429 they were positive may have moved to urban centers for care and treatment, which unfortunately can-  
47  
48 430 not be examined further in this cross-sectional study. Further research is needed with regard to this  
49  
50 431 observation.

51 432         Second, HIV prevalence among older transgender women ( $\geq 25$  years) was significantly  
52  
53 433 higher, compared to that among their younger counterparts. This finding is similar to those of  
54  
55 434 previous studies in Cambodia<sup>22</sup> and Thailand.<sup>3</sup> A possible explanation is that older transgender  
56  
57  
58  
59  
60

1  
2  
3 435 women had been exposed to risks for a longer period of time; the number of their sexual part-  
4  
5 436 ners accumulated over time and thus increased cumulative probability of HIV acquisition.<sup>22</sup>  
6

7 437 Third, our study suggests that more overt feminine expression (e.g., those who dressed  
8  
9 438 as a woman all the time) was associated with a higher HIV prevalence. A study in the United  
10  
11 439 States found that transgender women who disclosed their female gender identity possessed a  
12  
13 440 higher HIV prevalence.<sup>33</sup> In our study, these transgender women who dressed as a woman all  
14  
15 441 the time had higher numbers of both male non-commercial (mean= 8.1 vs. 5.1;  $p= 0.004$ ) and  
16  
17 442 male commercial sexual partners (mean= 3.7 vs. 1.6;  $p< 0.001$ ), compared to those who did not.  
18  
19 443 Making their female status visible could render more chances to meet with men. However, it  
20  
21 444 could make them difficult to find a decent job due to stigmatization and discrimination, thus  
22  
23 445 leading them to engage in sex work. This finding is in line with existing literature showing that  
24  
25 446 transgender women try to have sex with men –both casual and paid sex– to prove or validate  
26  
27 447 their female gender identity.<sup>34–36</sup> In these contexts, “sex work provides both desired gender af-  
28  
29 448 firmation and economic stability, often with greater financial rewards for sex without a con-  
30  
31 449 dom.”<sup>34</sup> The desire to affirm their gender identity and attractiveness to men also incentivizes  
32  
33 450 them to engage in casual sex with multiple partners.<sup>15</sup> This sexual behavior may make them  
34  
35 451 more prone to HIV infection.

36 452 There is a tendency to self-inject gender-affirming hormones, often with shared needles,  
37  
38 453 among transgender women in Cambodia.<sup>37</sup> This risky practice was associated with an increased  
39  
40 454 risk of HIV infection, implying that self-injecting was performed through unsafe means, and that  
41  
42 455 injecting by a trained health or other professional might mitigate the likelihood of HIV infection.  
43  
44 456 Although hormone injection to augment femininity is becoming more common, it can potential-  
45  
46 457 ly cause adverse health effects among transgender women.<sup>3 38</sup> A Thai study also found that  
47  
48 458 transgender women who injected hormone to make them more feminine had a higher HIV  
49  
50 459 prevalence.<sup>3</sup>

51 460 Fourth, transgender women who completed or dropped out primary school had a higher  
52  
53 461 HIV prevalence than those with high-school education. This finding confirms results of the  
54  
55 462 TGIBBS 2012 in Cambodia<sup>22</sup> and other studies<sup>6 39</sup> that associated low education with high HIV  
56  
57 463 prevalence among transgender women. This has important implications for HIV programs to  
58  
59  
60

1  
2  
3 464 ensure that poorly educated transgender women are reached with education, information,  
4  
5 465 communication and skills related to HIV prevention and other health-related services.  
6

7 466 Fifth, transgender women with self-reported STI symptoms (having ulcerations or sores  
8  
9 467 in the genital area in the past 12 months) had a greater HIV prevalence. This is in line with exist-  
10  
11 468 ing evidence showing that STIs promote HIV transmission via a variety of biological mecha-  
12  
13 469 nisms.<sup>40</sup> Transgender women with high rates of STIs, particularly ulcerative genital diseases, are  
14  
15 470 at high risk of HIV acquisition.<sup>23</sup>  
16

17 471 Finally, transgender women who reported never using online services developed for  
18  
19 472 transgender women or MSM had an increased risk of HIV infection. Low utilization of online  
20  
21 473 services by key populations in Cambodia is iterated in other studies.<sup>41</sup> Non-users of online ser-  
22  
23 474 vices, which tend to provide HIV information, education and communication, might have riskier  
24  
25 475 sexual behaviors. Our data suggest that transgender women who did not use online services  
26  
27 476 had higher numbers of overall male sexual partners (10.2 vs. 6.3,  $p= 0.002$ ) and male commer-  
28  
29 477 cial sexual partners (0.8 vs. 0.6,  $p= 0.001$ ) in the past three months. Also, they had a higher rate  
30  
31 478 of inconsistent condom use with male commercial sexual partners in the past three months  
32  
33 479 (48.5% vs. 34.4%,  $p= 0.004$ ). Studies in other settings confirm that transgender women with  
34  
35 480 multiple sexual partners are exposed to a riskier level of HIV infection.<sup>6,15</sup> This finding suggests  
36  
37 481 that access to community-based services tailored to transgender population can reduce their  
38  
39 482 vulnerability to HIV as demonstrated in other settings.<sup>42</sup> Sustaining and increasing the coverage  
40  
41 483 of internet and peer-led community-based services for this population is particularly important,  
42  
43 484 given that they are often unable to access health services due to stigmatization and discrimina-  
44  
45 485 tion,<sup>16,41</sup> even in health care settings.<sup>18</sup> As in other settings globally,<sup>9</sup> only half of those who  
46  
47 486 were infected with HIV were aware of their status, demonstrating the need to intensify HIV  
48  
49 487 testing, including self-testing at the community level, which transgender women in Cambodia  
50  
51 488 are willing to use.<sup>43</sup> Our study also found that once diagnosed, the coverage of ART was high in  
52  
53 489 this population.  
54

55 490

## 56 491 **LIMITATIONS OF THE STUDY**

57  
58  
59  
60

1  
2  
3 492 Our study covered only the capital city and 12 provinces, which contain the highest numbers of  
4  
5 493 transgender women. Since cities and provinces with fewer TG were left out, these results may  
6  
7 494 not be generalized to all transgender women nationally. Second, the initial participant seeds  
8  
9 495 were identified and recruited by outreach workers of community-based organizations, which  
10  
11 496 could introduce bias towards transgender women under their programs, leading to a recruit-  
12  
13 497 ment bias. This problem could be exacerbated by outreach workers interviewing some partici-  
14  
15 498 pants who had received services from their NGO, which could have induced the participants'  
16  
17 499 responses. Third, this study employed a self-reporting questionnaire on sensitive health and  
18  
19 500 sexual behaviors, which may have been limited by social desirability bias. Fourth, albeit mini-  
20  
21 501 mal, the monetary incentive given to the participants to recruit seeds may have affected their  
22  
23 502 genuine motivation to partake in the study, which could influence their responses. Fifth, we  
24  
25 503 used the backward selection of variables in the multivariable analysis. By using this method, we  
26  
27 504 possibly dropped one or more variables that could be significant if we kept them until the final  
28  
29 505 model. Finally, as this study was cross-sectional, it reports associations at a given time, and may  
30  
31 506 not be construed to be reporting causal relationships.

32 507

33 508 **CONCLUSIONS**

34  
35 509 This study demonstrates that HIV prevalence among transgender women in Cambodia remains  
36  
37 510 persistently high. With the prevalence rate at 5.9%, higher prevalence was observed among  
38  
39 511 transgender women who resided in urban areas, of older age, with low education levels, with  
40  
41 512 previous genital sores, with a history of self-injected hormone and those who had never used  
42  
43 513 online services developed for transgender women or MSM. Therefore, to eliminate new HIV  
44  
45 514 infections among transgender women, tailored interventions need to focus on these sub-  
46  
47 515 populations and attendant risk factors.

48 516

49  
50 517 **Acknowledgments** This study was conducted in collaboration between the consortium partners  
51  
52 518 of the HIV/AIDS Flagship Project including KHANA, FHI360, PSI/PSK and the 13 Municipal and  
53  
54 519 Provincial Health Departments under the leadership of National Center for HIV/AIDS, Derma-  
55  
56 520 tology and STD (NCHADS). We thank all implementing partners and participants in the study  
57  
58  
59  
60

1  
2  
3 521 who fully supported during the study design and data collection. Disclaimer: Content of this pa-  
4  
5 522 per is the responsibility of the authors and does not reflect the view of USAID or our respective  
6  
7 523 institutions.  
8

9 524  
10  
11 525 **Contributors** SC, ST, PM, CL and SY designed the study, developed the research protocol and  
12  
13 526 tools. SC, CN and SY analyzed the data, interpreted the results and wrote the manuscript. PC,  
14  
15 527 SC, CL, KP, ST and PM were responsible for training and data collection. JM, JD and GM sup-  
16  
17 528 ported findings analyses and manuscript writing. All authors read and approved the final manu-  
18  
19 529 script.  
20

21 530

### 22 531 **Funding**

23  
24 532 This study was conducted as part of the HIV/AIDS Flagship Project funded by President's Emer-  
25  
26 533 gency Plan For AIDS Relief (PEPFAR) through the United States Agency for International Devel-  
27  
28 534 opment (USAID).  
29

30 535

31 536 **Competing interests** None declared.  
32

33 537

34  
35 538 **Patient consent** Obtained  
36

37 539

38  
39 540 **Ethics approval** The National Ethics Committee for Health Research (NE-CHR) of the Ministry of  
40  
41 541 Health, Cambodia (No. 420 NECHR) and FHI 360's Protection of Human Subjects Committee  
42  
43 542 (PHSC No. 713897).  
44

45 543

### 46 544 **Consent for publication**

47  
48 545 Consent to publish was obtained from participants as stated in the informed consent form.  
49

50 546

51  
52 547 **Data sharing statement** Data used for this study cannot be made available in the manuscript,  
53  
54 548 the supplemental files or a public repository due to the ethical restriction stated in the agree-  
55

56

57

58

59

60

1  
2  
3 549 ment with the ethical committees. However, they can be accessed upon request from the Prin-  
4  
5 550 cipal Investigator (Dr. Siyan Yi) at [siyan@doctor.com](mailto:siyan@doctor.com).  
6  
7 551

8  
9 552 **REFERENCES**

- 10 553 1. Baral SD, Poteat T, Stromdahl S, *et al.* Worldwide burden of HIV in transgender women:  
11 554 a systematic review and meta-analysis. *Lancet Infect Dis* 2013;13(3):214-22.  
12 555 2. Silva-Santisteban A, Raymond HF, Salazar X, *et al.* Understanding the HIV/AIDS epidemic  
13 556 in transgender women of Lima, Peru: results from a sero-epidemiologic study using  
14 557 respondent driven sampling. *AIDS Behav* 2012;16(4):872-81.  
15 558 3. Guadamuz TE, Wimonasate W, Varangrat A, *et al.* HIV prevalence, risk behavior, hormone  
16 559 use and surgical history among transgender persons in Thailand. *AIDS Behav*  
17 560 2011;15(3):650-8.  
18 561 4. Brennan J, Kuhns LM, Johnson AK, *et al.* Syndemic theory and HIV-related risk among  
19 562 young transgender women: the role of multiple, co-occurring health problems and social  
20 563 marginalization. *Am J Public Health* 2012;102(9):1751-7.  
21 564 5. Nemoto T, Operario D, Keatley J, *et al.* HIV risk behaviors among male-to-female  
22 565 transgender persons of color in San Francisco. *Am J Public Health* 2004;94(7):1193-9.  
23 566 6. Clements-Nolle K, Marx R, Guzman R, *et al.* HIV prevalence, risk behaviors, health care  
24 567 use, and mental health status of transgender persons: implications for public health  
25 568 intervention. *Am J Public Health* 2001;91(6):915-21.  
26 569 7. Gay and Lesbian Medical Association. *Healthy People 2010 Companion Document for*  
27 570 *Lesbian, Gay, Bisexual, and Transgender (LGBT) Health*. San Francisco, CA, United States:  
28 571 Gay and Lesbian Medical Association, 2001.  
29 572 8. Poteat T, Reisner SL, Radix A. HIV epidemics among transgender women. *Curr Opin HIV*  
30 573 *AIDS* 2014;9(2):168-73.  
31 574 9. United Nations Programme on HIV/AIDS (UNAIDS). *Fast Track: Ending the AIDS epidemic*  
32 575 *by 2030*. Geneva, Switzerland: UNAIDS, 2014  
33 576 10. Wiessing LG, van Roosmalen MS, Koedijk P, *et al.* Silicones, hormones and HIV in  
34 577 transgender street prostitutes. *AIDS* 1999;13(16):2315-6.  
35  
36  
37  
38  
39  
40  
41  
42  
43  
44  
45  
46  
47  
48  
49  
50  
51  
52  
53  
54  
55  
56  
57  
58  
59  
60

- 1  
2  
3 578 11. Global Forum on MSM and HIV. *MSM and HIV/AIDS Risk in Asia : What Is Fueling the*  
4  
5 579 *Epidemic Among MSM and How Can It Be Stopped?* Oakland, CA, United States: Global  
6  
7 580 Forum on MSM and HIV, 2006.  
8  
9 581 12. De Santis JP. HIV infection risk factors among male-to-female transgender persons: a  
10  
11 582 review of the literature. *J Assoc Nurses AIDS Care* 2009;20(5):362-72.  
12  
13 583 13. Operario D, Nemoto T, Iwamoto M, *et al.* Unprotected sexual behavior and HIV risk in  
14  
15 584 the context of primary partnerships for transgender women. *AIDS Behav*  
16  
17 585 2011;15(3):674-82.  
18  
19 586 14. Bockting WO, Robinson BE, Forberg J, *et al.* Evaluation of a sexual health approach to  
20  
21 587 reducing HIV/STD risk in the transgender community. *AIDS care* 2005;17(3):289-303.  
22  
23 588 15. Bockting WO, Robinson BE, Rosser BR. Transgender HIV prevention: a qualitative needs  
24  
25 589 assessment. *AIDS care* 1998;10(4):505-25.  
26  
27 590 16. Chakrapani V, Newman PA, Shunmugam M, *et al.* Syndemics of depression, alcohol use,  
28  
29 591 and victimisation, and their association with HIV-related sexual risk among men who  
30  
31 592 have sex with men and transgender women in India. *Glob Public Health* 2015:1-16.  
32  
33 593 17. Nemoto T, Iwamoto M, Perngparn U, *et al.* HIV-related risk behaviors among kathoey  
34  
35 594 (male-to-female transgender) sex workers in Bangkok, Thailand. *AIDS care*  
36  
37 595 2012;24(2):210-9.  
38  
39 596 18. Scheim AI, Santos GM, Arreola S, *et al.* Inequities in access to HIV prevention services for  
40  
41 597 transgender men: results of a global survey of men who have sex with men. *J Int AIDS*  
42  
43 598 *Soc* 2016;19(3 Suppl 2):20779.  
44  
45 599 19. Schneiders ML, Weissman A. Determining barriers to creating an enabling environment  
46  
47 600 in Cambodia: results from a baseline study with key populations and police. *J Int AIDS*  
48  
49 601 *Soc* 2016;19(4 Suppl 3):20878.  
50  
51 602 20. Brennan J, Kuhns LM, Johnson AK, *et al.* Syndemic theory and HIV-related risk among  
52  
53 603 young transgender women: the role of multiple, co-occurring health problems and social  
54  
55 604 marginalization. *Am J Public Health* 2012;102(9):1751-7.  
56  
57  
58  
59  
60



- 1  
2  
3 605 21. Raiford JL, Hall GJ, Taylor RD, *et al.* The Role of Structural Barriers in Risky Sexual  
4  
5 606 Behavior, Victimization and Readiness to Change HIV/STI-Related Risk Behavior Among  
6  
7 607 Transgender Women. *AIDS behav* 2016;20(10):2212-21.  
8  
9 608 22. Weissman A, Ngak S, Srean C, *et al.* HIV Prevalence and Risks Associated with HIV  
10  
11 609 Infection among Transgender Individuals in Cambodia. *PLoS One* 2016;11(4):e0152906.  
12  
13 610 23. Chhorvann C, Vonthanak S. *Estimations and Projections of HIV/AIDS in Cambodia 2010-*  
14  
15 611 *2015*. Phnom Penh, Cambodia: National Center for HIV/AIDS, Dermatology and STDs  
16  
17 612 (NCHADS), 2011.  
18  
19 613 24. Liu K, Chhea C. *The BROS Khmer: Behavioral risks on-site serosurvey among at-risk urban*  
20  
21 614 *men in Cambodia*. Phnom Penh, Cambodia: FHI 360, 2010.  
22  
23 615 25. National Center for HIV/AIDS, Dermatology and STD (NCHADS). *Standard Operation*  
24  
25 616 *Procedure (SoP) for Boosted Continuum of Prevention to Care and Treatment for Most at*  
26  
27 617 *Risk Population in Cambodia*. Phnom Penh, Cambodia: NCHADS, 2013.  
28  
29 618 26. Mun P, Chhim S, Chhoun P, *et al.* *National Popualtion Size Estimation, HIV related Risk*  
30  
31 619 *Behaoviors, and HIV Prevrence among Men who Sex with Men in Cambodia in 2014*.  
32  
33 620 Phnom Penh, Cambodia: NCHADS/KHANA, 2016.  
34  
35 621 27. FHI360. *Size estimation of Transgender Population in Cambodia, 2012*. Phnom Penh,  
36  
37 622 Cambodia: FHI 360, 2012.  
38  
39 623 28. National Center for HIV/AIDS, Detamatology and STD (NCHADS). *Standard Operating*  
40  
41 624 *Procedures for HIV Testing and Counseling (HTC)*. Phnom Penh, Cambodia: NCHADS,  
42  
43 625 2012.  
44  
45 626 29. FHI360. *Behavioral Surveillance Surveys (BSS). Guideline for Repeated behavioral Surveys*  
46  
47 627 *in Population at Risk of HIV*. Washington DC, United States: FHI360, 2000.  
48  
49 628 30. Mun P, Sopheab H, Tuot S, *et al.* *National HIV sentinel survey among women attending*  
50  
51 629 *antenatal care in Cambodia 2014*. Phnom Penh, Cambodia: NCHADS, 2016.  
52  
53 630 31. National Center for HIV/AIDS, Dermatology and STDs (NCHADS). *Cambodia Sub-National*  
54  
55 631 *HIV Estimates and Projection*. Phnom Penh, Cambodia: NCHADS; 2016.  
56  
57 632 32. Yi S, Chhim S, Chhoun P, *et al.* *Men who have sex with men in Cambodia: Population*  
58  
59 633 *size, HIV risky behaviors, and HIV prevalence*. *Am J Epidemiol Infect Dis* 2016;4(5):91-9  
60

- 1  
2  
3 634 33. Nuttbrock L, Hwahng S, Bockting W, *et al.* Lifetime risk factors for HIV/sexually  
4 transmitted infections among male-to-female transgender persons. *J Acquir Immune*  
5 635 *Defic Syndr* 2009;52(3):417-21.  
6  
7 636  
8  
9 637 34. Melendez RM, Pinto R. 'It's really a hard life': Love, gender and HIV risk among male-to-  
10 female transgender persons. *Cult Health Sex* 2007;9(3):233-45.  
11 638  
12  
13 639 35. Sevelius JM. Gender Affirmation: A Framework for Conceptualizing Risk Behavior Among  
14 Transgender Women of Color. *Sex Roles* 2013;68(11):675-89.  
15 640  
16  
17 641 36. Sausa LA, Keatley J, Operario D. Perceived risks and benefits of sex work among  
18 transgender women of color in San Francisco. *Arch Sex Behav* 2007;36(6):768-77.  
19 642  
20  
21 643 37. Yi S, Ngin C, Tuot S, *et al.* HIV prevalence, risky behaviors, and discrimination  
22 644 experiences among transgender women in Cambodia: Descriptive findings from a  
23 national integrated biological and behavioral survey. *BMC Int Health Hum Rights* 2016.  
24 645 (In press).  
25 646  
26  
27 647 38. Sanchez NF, Sanchez JP, Danoff A. Health Care Utilization, Barriers to Care, and  
28 Hormone Usage Among Male-to-Female Transgender Persons in New York City. *Am J*  
29 648 *Public Health* 2009;99(4):713-9.  
30 649  
31  
32 650 39. Simon PA, Reback CJ, Bemis CC. HIV prevalence and incidence among male-to-female  
33 transsexuals receiving HIV prevention services in Los Angeles County. *AIDS*  
34 651 2000;14(18):2953-5.  
35 652  
36  
37 653 40. Fleming DT, Wasserheit JN. From epidemiological synergy to public health policy and  
38 practice: the contribution of other sexually transmitted diseases to sexual transmission  
39 of HIV infection. *Sex Transm Infect* 1999;75(1):3-17.  
40 654  
41  
42 655 41. HIV Innovate and Evaluate Project, University Research Co., LLC (URC-HIEP). *Evaluation*  
43 *of the HIV Program for Transgender Women in Cambodia*. Phnom Penh, Cambodia: URC-  
44 HIEP, 2016.  
45 656  
46  
47 657 42. Shaikh S, Mburu G, Arumugam V, *et al.* Empowering communities and strengthening  
48 systems to improve transgender health: outcomes from the Pehchan programme in  
49 India. *J Int AIDS Soc* 2016;19(3 Suppl 2):20809.  
50 659  
51 660  
52  
53  
54  
55  
56  
57  
58  
59  
60

- 1  
2  
3 662 43. Pal K, Ngin C, Tuot S, *et al.* Acceptability Study on HIV Self-Testing among Transgender  
4  
5 663 Women, Men who Have Sex with Men, and Female Entertainment Workers in  
6  
7 664 Cambodia: A Qualitative Analysis. PloS One 2016;11(11):e0166129.  
8  
9 665

10  
11  
12  
13  
14  
15  
16  
17  
18  
19  
20  
21  
22  
23  
24  
25  
26  
27  
28  
29  
30  
31  
32  
33  
34  
35  
36  
37  
38  
39  
40  
41  
42  
43  
44  
45  
46  
47  
48  
49  
50  
51  
52  
53  
54  
55  
56  
57  
58  
59  
60

For peer review only

Participant ID Code: .....

**Integrated Biological and Behavioral Survey of Transgender Women in Cambodia, 2016**

Date of interview: day.....month.....year.....

Province/City:

- |                     |                     |                  |
|---------------------|---------------------|------------------|
| 1. Phnom Pehn       | 6. Preah Sihanouk   | 11. Kandal       |
| 2. Kampong Cham     | 7. Prey Veng        | 12. Koh Kong     |
| 3. Battambang       | 8. Svay Rieng       | 13. Thbong Khmum |
| 4. Siem Reap        | 9. Kampong Spue     |                  |
| 5. Banteay Meanchey | 10. Kampong Chhnang |                  |

Interview Location (City/NGOs): .....

Name of administrative districts (current residence): .....

Status of administrative districts:

- 1- Urban
- 2- Rural

| SECTION 1: SOCIODEMOGRAPHIC CHARACTERISTICS                                             |                                                             |                                                                                                                                                                                                                                                                               |         |
|-----------------------------------------------------------------------------------------|-------------------------------------------------------------|-------------------------------------------------------------------------------------------------------------------------------------------------------------------------------------------------------------------------------------------------------------------------------|---------|
| No.                                                                                     | Questions and filters                                       | Coding categories                                                                                                                                                                                                                                                             | Skip to |
| <b>Now I would like to ask you some questions related to your personal information.</b> |                                                             |                                                                                                                                                                                                                                                                               |         |
| Q001                                                                                    | How old are you?                                            | Age in completed years:<br>.....                                                                                                                                                                                                                                              |         |
| Q002                                                                                    | What is your current marital status?<br>(only one response) | Married and living together 1<br>Married ,but not living together 2<br>Widowed, Divorced or separated 3<br>Not married, not living with any partner 4<br>Not married, living with sweetheart (female) 5<br>Not married but living with male lover 6<br>Other (Specify.....) 7 |         |
| Q003                                                                                    | For how long have you been living in the current city?      | .....Years<br><u>Record 0</u> if not living in this city<br><u>Record 1</u> if living in this city 1 year or less<br>Refuse to answer 99                                                                                                                                      |         |
| Q004                                                                                    | In the past 6 months, on average, how much money            | Amount of money (in US\$): .....<br>Refuse to answer 99                                                                                                                                                                                                                       |         |

|      |                                                                                                                                                                                                |                                                                                                                                                                                                                                                                                                              |    |
|------|------------------------------------------------------------------------------------------------------------------------------------------------------------------------------------------------|--------------------------------------------------------------------------------------------------------------------------------------------------------------------------------------------------------------------------------------------------------------------------------------------------------------|----|
|      | did you make per month?<br>(exchange rate: 4000 riel per<br>1 US\$)                                                                                                                            |                                                                                                                                                                                                                                                                                                              |    |
| Q005 | How many years of formal<br>education have you<br>completed?                                                                                                                                   | Number of years: .....                                                                                                                                                                                                                                                                                       |    |
|      |                                                                                                                                                                                                | <u>Record 0</u> if never attending school.                                                                                                                                                                                                                                                                   |    |
|      |                                                                                                                                                                                                | Refuse to answer                                                                                                                                                                                                                                                                                             | 99 |
| Q006 | What is your current job<br>(main source of income)?<br><br>(only one response)<br><br><i>Note: If you are both studying<br/>and having a paid job, report<br/>your main source of income.</i> | Unemployed 0<br>Hair dresser/Beautician 1<br>Government officer 2<br>Laborer (factory, construction work) 3<br>Seller 4<br>Entertainment Worker (bar, karaoke, etc.) 5<br>Sex worker 6<br>Student 7<br>NGO staff 8<br>Private company staff 9<br>Farmer/fisherman 10<br>Artist 11<br>Other (Specify.....) 12 |    |

## SECTION 2. TRANSGENDER IDENTITY & EXPERIENCES

|      |                                                                                                                       |                                                                                            |            |
|------|-----------------------------------------------------------------------------------------------------------------------|--------------------------------------------------------------------------------------------|------------|
| Q007 | What gender do you consider<br>yourself?                                                                              | Female 1<br>Male 2<br>Third gender 3<br>Uncertain 4<br>Refuse to answer 99                 |            |
| Q008 | How often do you express or<br>dress yourself as a woman?                                                             | All the time 1<br>Often 2<br>Sometimes 3<br>Rarely 4<br>Refuse to answer 99                |            |
| Q009 | How many friends in your<br>social network are also<br>transgender?                                                   | Number: .....                                                                              |            |
| Q010 | Have you ever taken<br>hormones or any substances<br>for beauty purposes?                                             | No 1<br>Yes 2<br>Refuse to answer 99                                                       | 2→<br>Q014 |
| Q011 | What are the methods you<br>have used to take hormones<br>or any substances for beauty<br>purposes? [multiple answer] | Pills 1<br>Injections 2<br>Skin patches 3<br>Other (Specify.....) 4<br>Refuse to answer 99 |            |
| Q012 | If you have taken hormones<br>or any substances for beauty                                                            | Never injected 0<br>Injected by myself 1                                                   |            |

|      |                                                                                              |                                                                                                                  |  |
|------|----------------------------------------------------------------------------------------------|------------------------------------------------------------------------------------------------------------------|--|
|      | purposes by injection, how have you received it?                                             | Injected by skilled personnel (beauty clinic) 2<br>Injected by non-skilled personnel 3<br>Other (Specify.....) 4 |  |
| Q013 | If you have injected hormones or any substances for beauty purposes, have you shared needle? | Never injected 0<br>No 1<br>Yes 2<br>Refuse to answer 99                                                         |  |
| Q014 | Have you ever had any operation to change any parts of your body to become a woman?          | No 1<br>Yes 2<br>Refuse to answer 99                                                                             |  |

| <b>Section 3. SEXUAL PARTNERS AND SEXUAL HISTORY</b> |                                                                                                                          |                                                                                   |                    |
|------------------------------------------------------|--------------------------------------------------------------------------------------------------------------------------|-----------------------------------------------------------------------------------|--------------------|
| <b>No.</b>                                           | <b>Questions and filters</b>                                                                                             | <b>Coding categories</b>                                                          | <b>Skip to</b>     |
|                                                      | <b>Now I would like to ask questions about your recent sexual relationship with various kinds of sexual partners.</b>    |                                                                                   |                    |
| Q015                                                 | Have you ever had sex with any partner in your life time? [Including vaginal, or anal sex]                               | No 0<br>Yes 1<br>Refuse to answer 99                                              |                    |
| Q016                                                 | How likely do you think you are infected with HIV?                                                                       | Very Likely 1<br>Likely 2<br>Unlikely 3<br>Very Unlikely 4<br>Refuse to answer 99 |                    |
| <b>Sex with women</b>                                |                                                                                                                          |                                                                                   |                    |
| Q017                                                 | Have you ever had sex with a woman? [Including vaginal or anal sex]                                                      | No 0<br>Yes 1<br>Refuse to answer 99                                              | 0, 99<br>→<br>Q028 |
| Q018                                                 | In the past 12 months, have you had sex with a woman? [Including vaginal or anal sex]                                    | No 0<br>Yes 1<br>Refuse to answer 99                                              | 0, 99<br>→<br>Q028 |
| Q019                                                 | In the past 12 months, have you had sex with a woman not in exchange for money or gifts? [Including vaginal or anal sex] | No 0<br>Yes 1<br>Refuse to answer 99                                              | 0→<br>Q022         |
| Q020                                                 | In the past 3 month, how many women did you have                                                                         | Number of women:<br>.....                                                         |                    |

Questionnaire; Integrated Biological and Behavioral Survey among Transgender Population in Cambodia, 2015, Version 2.0, 17 September 2015 Page 3 of 11

|      |                                                                                                                                                                          |                                                                                                                                                                                                                                                                                          |               |
|------|--------------------------------------------------------------------------------------------------------------------------------------------------------------------------|------------------------------------------------------------------------------------------------------------------------------------------------------------------------------------------------------------------------------------------------------------------------------------------|---------------|
|      | sex with not in exchange for money or gifts?                                                                                                                             | Refuse to answer 99                                                                                                                                                                                                                                                                      |               |
| Q021 | In the past 3 month, how often did you use a condom when you had vaginal or anal sex with women not in exchange for money or gifts?                                      | Never had sex with a woman 0<br>Always 1<br>Often 2<br>Sometimes 3<br>Never 4<br>Refuse to answer 99                                                                                                                                                                                     | 0, 1→<br>Q024 |
| Q022 | In the past 3 month, if you did not always use a condom when you had sex with women not in exchange for money or gifts? What were the reasons?<br><br>[Multiple Answers] | We are in a relationship 1<br>She is not HIV/STI infected 2<br>Too high to use a condom 3<br>No condom available 4<br>Feel better without a condom 5<br>I am HIV-infected 6<br>I penetrated, so I am not at risk 7<br>Partner refused 8<br>Other (Specify.....) 9<br>Refuse to answer 99 |               |
| Q023 | In the past 12 months, have you had sex with a woman in exchange for money or gifts? [Including vaginal or anal sex]                                                     | No 0<br>Yes 1<br>Refuse to answer 99                                                                                                                                                                                                                                                     | 0→<br>Q028    |
| Q024 | In the past 3 months, how many women did you have sex with in exchange for money or gifts? [Including vaginal or anal sex]                                               | Number of women:<br>.....<br>Refuse to answer 99                                                                                                                                                                                                                                         |               |
| Q025 | Where did you meet women with whom you had sex with in exchange for money or gifts??                                                                                     | Park 1<br>Street 2<br>Bar/discotheque/cafe 3<br>Beer Garden/Restaurant 4<br>Massage Parlor 5<br>Karaoke 6<br>Online (Facebook, Line, Website) 7<br>Guesthouse/hotel 8<br>Workplace/school 9<br>Other (Specify.....) 10                                                                   |               |
| Q026 | In the past 12 months, how often did you use a condom when you had vaginal or anal sex with women in exchange for money or gifts?                                        | Never had sex 0<br>Always 1<br>Often 2<br>Sometimes 3<br>Never 4<br>Refuse to answer 99                                                                                                                                                                                                  |               |

|      |                                                                                                                                                                              |                                                                                                                                                                                                                                                                                          |  |
|------|------------------------------------------------------------------------------------------------------------------------------------------------------------------------------|------------------------------------------------------------------------------------------------------------------------------------------------------------------------------------------------------------------------------------------------------------------------------------------|--|
| Q027 | In the past 3 months, if you did not always use a condom when you had sex with women not in exchange for money or gifts?<br>What were the reasons?<br><br>[Multiple Answers] | We are in a relationship 1<br>She is not HIV/STI infected 2<br>Too high to use a condom 3<br>No condom available 4<br>Feel better without a condom 5<br>I am HIV-infected 6<br>I penetrated, so I am not at risk 7<br>Partner refused 8<br>Other (Specify.....) 9<br>Refuse to answer 99 |  |
|------|------------------------------------------------------------------------------------------------------------------------------------------------------------------------------|------------------------------------------------------------------------------------------------------------------------------------------------------------------------------------------------------------------------------------------------------------------------------------------|--|

| Sex with men |                                                                                                                          |                                                                                                                                                                                                                                                                                                       |                   |
|--------------|--------------------------------------------------------------------------------------------------------------------------|-------------------------------------------------------------------------------------------------------------------------------------------------------------------------------------------------------------------------------------------------------------------------------------------------------|-------------------|
| Q028         | Have you ever had anal sex with a man?                                                                                   | No 0<br>Yes 1<br>Refuse to answer 99                                                                                                                                                                                                                                                                  | 0,<br>99→<br>Q042 |
| Q029         | In the past 12 months, have you had anal sex with a man?                                                                 | No 0<br>Yes 1<br>Refuse to answer 99                                                                                                                                                                                                                                                                  | 0,<br>99→<br>Q042 |
| Q030         | In the past 12 months, what was your usual role in anal sex with a man?                                                  | Insertive 1<br>Receptive 2<br>Both 3<br>Refuse to answer 99                                                                                                                                                                                                                                           |                   |
| Q031         | In the past 3 months, have you had sex with men not in exchange for money or gifts?                                      | No 0<br>Yes 1<br>Refuse to answer 99                                                                                                                                                                                                                                                                  | 0→<br>Q033        |
| Q032         | In the past 3 months, how many men you had sex with not in exchange for money or gifts?                                  | Number of men: .....<br>Refuse to answer 99                                                                                                                                                                                                                                                           |                   |
| Q033         | In the past 12 months, how often did you use a condom when you had anal sex with men not in exchange for money or gifts? | Never had sex 0<br>Always 1<br>Often 2<br>Sometimes 3<br>Never 4<br>Refuse to answer 99                                                                                                                                                                                                               | 0, 1→<br>Q035     |
| Q034         | If not always, why not?<br><br>[Multiple Answers]                                                                        | We are in a relationship 1<br>He is not HIV/STI infected 2<br>I was too drunk or too high with drugs 3<br>No condom available 4<br>Feel better without a condom 5<br>I am HIV-infected 6<br>I penetrated, so I am not at risk 7<br>Partner refused 8<br>Other (Specify.....) 9<br>Refuse to answer 99 |                   |



|      |                                                                                                        |                                                                                                                                                                                                                                                                                                    |               |
|------|--------------------------------------------------------------------------------------------------------|----------------------------------------------------------------------------------------------------------------------------------------------------------------------------------------------------------------------------------------------------------------------------------------------------|---------------|
| Q035 | In the past 12 months, have you had sex with men in exchange for money or gifts?                       | No 0<br>Yes 1<br>Refuse to answer 99                                                                                                                                                                                                                                                               | 0→<br>Q040    |
| Q036 | In the past 3 month, how many men you had sex with in exchange for money or gifts?                     | Number of men:<br>.....<br>Refuse to answer 99                                                                                                                                                                                                                                                     |               |
| Q037 | Where did you meet the men you had sex with in exchange for money or gifts?                            | Park 1<br>Street 2<br>Bar/discotheque/cafe 3<br>Beer Garden/Restaurant 4<br>Massage Parlor 5<br>Karaoke 6<br>Online (Facebook, Line, Website) 7<br>Guesthouse/hotel 8<br>Workplace/School 9<br>Other (Specify.....) 10                                                                             |               |
| Q038 | In the past 12 months, how often did you use a condom when you had anal sex with men you paid for sex? | Never had anal sex 0<br>Always 1<br>Often 2<br>Sometimes 3<br>Never 4<br>Refuse to answer 99                                                                                                                                                                                                       | 0, 1→<br>Q615 |
| Q039 | If not always, why not?<br><br>[Multiple Answers]                                                      | We are in a relationship 1<br>He is not HIV/STI infected 2<br>I was drunk or too high with drugs 3<br>No condom available 4<br>Feel better without a condom 5<br>I am HIV-infected 6<br>I penetrated, so I am not at risk 7<br>Partner refused 8<br>Other (Specify.....) 10<br>Refuse to answer 99 |               |

| Access to condoms and lubricant |                                                                              |                                                                                                                                                                                                        |         |
|---------------------------------|------------------------------------------------------------------------------|--------------------------------------------------------------------------------------------------------------------------------------------------------------------------------------------------------|---------|
| No.                             | Questions and filters                                                        | Coding categories                                                                                                                                                                                      | Skip to |
| Q040                            | In this last 12 months, where did you get condoms?<br><br>[Multiple Answers] | Friends/outreach workers 1<br>Condom peer sale representative 2<br>Pharmacy/drug store/clinic 3<br>Condom outlets 4<br>Mart/mini-mart 5<br>Groceries 6<br>Hotel/guesthouse 7<br>Other (Specify.....) 8 |         |

|      |                                                                                |                                                                                                                                                                                                                               |  |
|------|--------------------------------------------------------------------------------|-------------------------------------------------------------------------------------------------------------------------------------------------------------------------------------------------------------------------------|--|
|      |                                                                                | Refuse to answer 99                                                                                                                                                                                                           |  |
| Q041 | In this last 12 months, where did you get lubricant?<br><br>[Multiple Answers] | Friends/outreach workers 1<br>Condom peer sale representative 2<br>Pharmacy/drug store/clinic 3<br>Condom outlets 4<br>Mart/mini-mart 5<br>Groceries 6<br>Hotel/guesthouse 7<br>Other (Specify.....) 8<br>Refuse to answer 99 |  |

| SECTION 4. STI AND HIV TESTING |                                                                                                                          |                                                                                                                                                                                                                            |            |
|--------------------------------|--------------------------------------------------------------------------------------------------------------------------|----------------------------------------------------------------------------------------------------------------------------------------------------------------------------------------------------------------------------|------------|
| No.                            | Questions and filters                                                                                                    | Coding categories                                                                                                                                                                                                          | Skip to    |
| Q042                           | In the past 12 months, have you experienced the following symptoms?<br><br>[Multiple Answers]                            | Cuts or sores in the genital area 1<br>Swelling in the genital area 2<br>Abnormal urethral discharge 3<br>Symptoms on the anus 4<br>Symptom in the mouth/throat 5<br>Refuse to answer 99                                   |            |
| Q043                           | Where did you first go for treatment the last time you had any above-mentioned symptoms?<br><br>(Only one response)      | Never had any symptoms 0<br>Pharmacy 1<br>Private clinic/hospital 2<br>Public Hospital/STD clinic 3<br>NGO Clinic/hospital 4<br>Traditional doctor 5<br>Didn't get care 6<br>Other (Specify.....) 7<br>Refuse to answer 99 |            |
| Q044                           | Have you ever been tested for HIV?                                                                                       | No 0<br>Yes 1<br>Refuse to answer 99                                                                                                                                                                                       | 0→<br>Q049 |
| Q045                           | In past 6 months, have you been tested for HIV?                                                                          | No 0<br>Yes 1<br>Refuse to answer 99                                                                                                                                                                                       |            |
| Q046                           | How long has it been since you received the last HIV test?                                                               | Number of months.....                                                                                                                                                                                                      |            |
| Q047                           | If a rapid self-test kit for HIV was available and you could get the result within 20 minutes at home, would you use it? | No 0<br>Yes 1<br>Refuse to answer 99                                                                                                                                                                                       |            |

|      |                                                                               |                                                                                                                                                                                                                 |                |
|------|-------------------------------------------------------------------------------|-----------------------------------------------------------------------------------------------------------------------------------------------------------------------------------------------------------------|----------------|
| Q048 | Where did you have your most recent HIV test?                                 | Private facilities 1<br>Public facilities 2<br>NGO facilities 3<br>NGO outreach workers at community or HTC 4<br>Other (Specify.....) 5<br>Refuse to answer 99                                                  |                |
| Q049 | The last time you got tested for HIV, did you receive the result of the test? | No 0<br>Yes 1<br>Refuse to answer 99                                                                                                                                                                            |                |
| Q050 | What is your current HIV status? (You could choose not to answer)             | Positive 1<br>Negative 2<br>I don't know my status 3<br>Refuse to answer 99                                                                                                                                     | 2, 3 →<br>Q057 |
| Q051 | Are you currently on ART?                                                     | No 0<br>Yes 1<br>I was but discontinued 2<br>I am on treatment for opportunistic infections 3<br>Refuse to answer 99                                                                                            | 0 →<br>Q056    |
| Q052 | Do you take ARV regularly as prescribed?                                      | Regularly 1<br>Not regularly 2<br>Refuse to answer 99                                                                                                                                                           |                |
| Q053 | Where do you get ART services?                                                | Public facilities 1<br>Private facilities 2<br>NGO facilities 3<br>Pharmacy 4<br>Other (Specify.....) 5<br>Refuse to answer 99                                                                                  |                |
| Q054 | If not, why are you not on ART?                                               | Not needed 1<br>Not sure where to go 2<br>I am ashamed to go to health facility 3<br>I am afraid of being discriminated 4<br>I was treated badly in the past 5<br>Other (Specify.....) 6<br>Refuse to answer 99 |                |

**SECTION 5. ALCOHOL AND DRUG USE**

| <b>Measurement of alcohol drinking</b>                                                                                                         |                                                                                                                                                                             |                                                                                                                                                                                        |            |
|------------------------------------------------------------------------------------------------------------------------------------------------|-----------------------------------------------------------------------------------------------------------------------------------------------------------------------------|----------------------------------------------------------------------------------------------------------------------------------------------------------------------------------------|------------|
| One standard measurement:<br>- A can/glass of beer, fermented palm juice (285 ml)<br>- A glass of wine (120 ml)<br>- A glass of whisky (30 ml) |                                                                                                                                                                             |                                                                                                                                                                                        |            |
| No.                                                                                                                                            | Questions and filters                                                                                                                                                       | Coding categories                                                                                                                                                                      | Skip to    |
| Q055                                                                                                                                           | In the past 3 months, how often did you drink at least one can of beer or one glass of any types of wine?                                                                   | Never 1<br>Once a month or less 2<br>2-4 times a month 3<br>2-3 times a week 4<br>4 or more times a week 5<br>Don't know 98<br>Refuse to answer 99                                     | 1→<br>Q064 |
| Q056                                                                                                                                           | In the past 3 months, how many standard drinks containing alcohol (a can of beer or a glass of any types of wine) did you have on a typical day on which you drank alcohol? | 1 - 2 1<br>3 - 4 2<br>5 - 6 3<br>7 - 9 4<br>10 or more 5<br>Don't know 98<br>Refuse to answer 99                                                                                       |            |
| Q057                                                                                                                                           | In the past 3 months, how often did you have more than 5 drinks in one day or night?                                                                                        | Never 1<br>Less than once a month 2<br>Once a month 3<br>1, 2, or 3 times a week 4<br>4 or more times a week 5<br>Don't know 98<br>Refuse to answer 99                                 |            |
| Q058                                                                                                                                           | In the past 3 months, how often have you got drunk from alcohol?                                                                                                            | Never 1<br>Less than once a month 2<br>Once a month 3<br>Every week (1-3 times/week) 4<br>Every day/almost every day(4 or more times a week) 5<br>Don't know 98<br>Refuse to answer 99 |            |

|      |                                                                                                                          |                                            |     |    |
|------|--------------------------------------------------------------------------------------------------------------------------|--------------------------------------------|-----|----|
| Q059 | In the past 12 months, have you tried any of the following drugs? (Ask one by one - CIRCLE YES OR NO) [Multiple answers] |                                            |     |    |
|      |                                                                                                                          | Types of drug                              | Yes | No |
|      | 1                                                                                                                        | Marijuana                                  | 1   | 0  |
|      | 2                                                                                                                        | Heroin/Opium                               | 1   | 0  |
|      | 3                                                                                                                        | Yama (amphetamine)                         | 1   | 0  |
|      | 4                                                                                                                        | Crystal, Ice (Methamphetamine)             | 1   | 0  |
|      | 5                                                                                                                        | Ecstasy                                    | 1   | 0  |
|      | 6                                                                                                                        | Inhalants (glue, paint, petrol, spray can) | 1   | 0  |
|      | 7                                                                                                                        | Other                                      | 1   | 0  |
| Q060 | In the past 3 months, did you inject any illicit drugs?                                                                  |                                            |     |    |
|      |                                                                                                                          | Heroin                                     | 1   |    |
|      |                                                                                                                          | Yama                                       | 2   |    |
|      |                                                                                                                          | Crystal, Ice (Methamphetamine)             | 3   |    |
|      |                                                                                                                          | Never injected any drug                    | 4   |    |
|      | Refuse to answer                                                                                                         | 99                                         |     |    |
| Q061 | In the past 3 months, did you have sex during/after using illicit drugs?                                                 |                                            |     |    |
|      |                                                                                                                          | Heroin                                     | 1   |    |
|      |                                                                                                                          | Yama                                       | 2   |    |
|      |                                                                                                                          | Ice, Amphetamine                           | 3   |    |
|      |                                                                                                                          | Never used drug before having sex          | 4   |    |
|      | Refuse to answer                                                                                                         | 99                                         |     |    |

| SECTION 9. EXPOSURE TO INTERVENTION PROGRAMS |                                                                                       |                                                                                                                                                                                                  |         |
|----------------------------------------------|---------------------------------------------------------------------------------------|--------------------------------------------------------------------------------------------------------------------------------------------------------------------------------------------------|---------|
| No.                                          | Questions and filters                                                                 | Coding categories                                                                                                                                                                                | Skip to |
| Q062                                         | In the past 3 months, have you been reached by NGO staff delivering HIV services?     | No 0<br>Yes 1<br>Don't know 98<br>Refuse to answer 99                                                                                                                                            |         |
| Q063                                         | In the past 3 months, what kind of services have you received (Check all that apply). | HIV/health education and/or materials 1<br>Condoms 2<br>Lubricants 3<br>VCCT/STI testing 4<br>Law support services 5<br>Other health services 6<br>Other (Specify.....) 7<br>Refuse to answer 99 |         |
| Q064                                         | Do you have UIC card?                                                                 | Yes 1<br>No 0                                                                                                                                                                                    |         |

|      |                                                                                               |                                                                                            |                     |
|------|-----------------------------------------------------------------------------------------------|--------------------------------------------------------------------------------------------|---------------------|
|      |                                                                                               | Refuse to answer 99                                                                        |                     |
| Q065 | In the past 12 months, how often did you visit MStyle/Srey Sros club(s)?                      | ... times<br>Refuse to answer 99                                                           |                     |
| Q066 | Have you used online services developed for people like you (e.g. Facebook, website)?         | No 0<br>Yes 1<br>Refuse to answer 99                                                       | 0 -> stop interview |
| Q067 | Have you found any sexual partner on an Internet website or any online program?               | Never 0<br>Yes, always 1<br>Yes, sometimes 2<br>Yes, occasionally 3<br>Refuse to answer 99 |                     |
| Q068 | Have you accessed MStyle website in the past 6 months? (Attach the picture of MStyle webpage) | Never 0<br>Yes, always 1<br>Yes, sometimes 2<br>Yes, occasionally 3<br>Refuse to answer 99 |                     |

["Thank you very much for answering these questions. Let us repeat that your answers are totally confidential and there is no way anyone will learn what you told us.]

# BMJ Open

## HIV prevalence and factors associated with HIV infection among transgender women in Cambodia: Results from a national integrated biological and behavioral survey

|                                 |                                                                                                                                                                                                                                                                                                                                                                                                                                                                                                                                                                                                           |
|---------------------------------|-----------------------------------------------------------------------------------------------------------------------------------------------------------------------------------------------------------------------------------------------------------------------------------------------------------------------------------------------------------------------------------------------------------------------------------------------------------------------------------------------------------------------------------------------------------------------------------------------------------|
| Journal:                        | <i>BMJ Open</i>                                                                                                                                                                                                                                                                                                                                                                                                                                                                                                                                                                                           |
| Manuscript ID                   | bmjopen-2016-015390.R2                                                                                                                                                                                                                                                                                                                                                                                                                                                                                                                                                                                    |
| Article Type:                   | Research                                                                                                                                                                                                                                                                                                                                                                                                                                                                                                                                                                                                  |
| Date Submitted by the Author:   | 18-May-2017                                                                                                                                                                                                                                                                                                                                                                                                                                                                                                                                                                                               |
| Complete List of Authors:       | Chhim, Srean; FHI 360 Cambodia<br>Ngin, Chanrith; KHANA Center for Population Health Research<br>Chhoun, Pheak; KHANA Center for Population Health Research<br>Tuot, Sovannary; KHANA Center for Population Health Research<br>Ly, Cheaty; Population Services Khmer (PSK)<br>Mun, Phalkun; National Center for HIV/AIDS, Dermatology and STD (NCHADS)<br>Pal, Dyla; KHANA Center for Population Health Research<br>Macom, John; FHI 360<br>Dousset, Jean-Philippe ; FHI 360<br>Mburu, Gitau; Lancaster University, Division of Health Research<br>Yi, Siyan; KHANA Center for Population Health Research |
| <b>Primary Subject Heading</b>: | HIV/AIDS                                                                                                                                                                                                                                                                                                                                                                                                                                                                                                                                                                                                  |
| Secondary Subject Heading:      | Infectious diseases, Epidemiology, Public health                                                                                                                                                                                                                                                                                                                                                                                                                                                                                                                                                          |
| Keywords:                       | Transgender women, HIV infection, Risk factors, Prevention, Integrated Biological and Behavioral Survey, Cambodia                                                                                                                                                                                                                                                                                                                                                                                                                                                                                         |
|                                 |                                                                                                                                                                                                                                                                                                                                                                                                                                                                                                                                                                                                           |

SCHOLARONE™  
Manuscripts

1  
2  
3 1 **HIV prevalence and factors associated with HIV infection among transgender women in Cam-**  
4 **odia: Results from a national integrated biological and behavioral survey**  
5  
6  
7  
8

9 4 Chhim Srean,<sup>1</sup> Chanrith Ngin,<sup>2</sup> Pheak Chhoun,<sup>2</sup> Sovannary Tuot,<sup>2</sup> Cheaty Ly,<sup>3</sup> Phalkun Mun,<sup>4</sup>  
10  
11 5 Khondyla Pal<sup>2</sup>, John Macom<sup>5</sup>, Jean-Philippe Dousset<sup>1</sup>, Gitau Mburu<sup>6</sup>, Siyan Yi<sup>2,\*</sup>  
12  
13 6

14 7 <sup>1</sup> FHI 360, Phnom Penh, Cambodia

15 8 <sup>2</sup> KHANA Center for Population Health Research, Phnom Penh, Cambodia

16 9 <sup>3</sup> Population Services Khmer (PSK), Phnom Penh, Cambodia

17 10 <sup>4</sup> National Center for HIV/AIDS, Dermatology and STD (NCHADS), Phnom Penh, Cambodia

18 11 <sup>5</sup> FHI 360 Asia Pacific Regional Office, Bangkok, Thailand

19 12 <sup>6</sup> Division of Health Research, Lancaster University, Lancaster, UK

20  
21  
22 14 \* Correspondence to: Siyan Yi, No. 33, Street 71, Phnom Penh, Cambodia Tel: +855-23-211-505 /  
23  
24 15 Fax: +855-23-214-049 / Email: [siyan@doctor.com](mailto:siyan@doctor.com)  
25  
26  
27  
28  
29  
30  
31  
32  
33  
34  
35  
36  
37  
38  
39  
40  
41  
42  
43  
44  
45  
46  
47  
48  
49  
50  
51  
52  
53  
54  
55  
56  
57  
58  
59  
60



1  
2  
3 30 **ABSTRACT**

4  
5 31 **Objective:** To examine factors associated with HIV infection among transgender women in  
6  
7 32 Cambodia.

8  
9 33 **Design:** Cross-sectional study

10  
11 34 **Settings:** HIV high-burden sites including the capital city and 12 provinces

12  
13 35 **Participants:** This study included 1,375 sexually-active transgender women with a mean age of  
14  
15 36 25.9 years (SD= 7.1), recruited by using respondent driven sampling for structured question-  
16  
17 37 naire interviews and rapid finger-prick HIV testing.

18  
19 38 **Primary outcome measure:** HIV infection detected by using Determine™ antibody test.

20  
21 39 **Results:** HIV prevalence among this population was 5.9%. After adjustment for other covariates,  
22  
23 40 participants living in urban areas were twice as likely to be HIV infected as those living in rural  
24  
25 41 areas. Participants with primary education were 1.7 times as likely to be infected compared to  
26  
27 42 those with high school education. HIV infection increased with age; compared to those aged 18-  
28  
29 43 24, the odds of being HIV infected were twice as high among transgender women aged 25-34  
30  
31 44 and 2.8 times higher among those aged  $\geq 35$ . Self-injection of gender affirming hormones was  
32  
33 45 associated with a four-fold increase in the odds of HIV infection. A history of genital sores over  
34  
35 46 the previous 12 months increased the odds of HIV infection by three-fold. Transgender women  
36  
37 47 with stronger feminine identity, dressing as a woman all the time were twice as likely to be HIV  
38  
39 48 infected compared to those who did not dress as a woman all the time. Having never used  
40  
41 49 online services developed for transgender women in the past six months was also associated  
42  
43 50 with higher odds of being HIV infected.

44  
45 51 **Conclusions :** Transgender women in Cambodia are at high risk of HIV. To achieve the goal of  
46  
47 52 eliminating HIV in Cambodia, effective combination prevention strategies addressing the above  
48  
49 53 risk factors among transgender women should be strengthened.

50  
51 54  
52 55 **Key words:** Transgender women, HIV infection, Risk factors, Prevention, Integrated Biological  
53  
54 56 and Behavioral Survey, Cambodia.

55  
56 57

57  
58 58

59  
60 59

60  
61 60

1  
2  
3 59 **Strengths and limitations of this study**  
4  
5 60  
6  
7 61

- 8  
9 62  
10  
11 63  
12  
13 64  
14  
15 65  
16  
17 66  
18 67  
19  
20 68  
21  
22 69  
23  
24 70  
25  
26 71  
27  
28 72  
29  
30 73  
31  
32 74  
33  
34  
35  
36  
37  
38  
39  
40  
41  
42  
43  
44  
45  
46  
47  
48  
49  
50  
51  
52  
53  
54  
55  
56  
57  
58  
59  
60
- This is a rare and the second ever Integrated Biological and Behavioral Survey (IBBS) among transgender women—one of the most vulnerable and under-studied populations in Cambodia and globally.
  - This study covered HIV high-burden sites including the capital city and 12 provinces, thus providing more nationally generalizable results.
  - This study identified important risk factors for HIV infection among transgender women, which require being addressed in order to reduce HIV infection among this key population.
  - Limitations of the study included potential bias of self-reported measures, participant sampling, the cross-sectional nature of the data that limits causation inferences, and the backward selection of variables in multivariable analysis.

## 75 INTRODUCTION

76 Globally, transgender women are at high risk for HIV infection, and little is known about the  
77 burden of HIV infection and its related factors in this population. A 2013 systematic review  
78 showed that the global HIV prevalence among transgender women was 19%, with low- and  
79 middle-income countries having a slightly lower prevalence of 18% compared to 22% in high-  
80 income countries.<sup>1</sup> The probability of being infected with HIV among transgender women was  
81 approximately 49 times higher than among the general adult population.<sup>1</sup> Epidemiologically,  
82 transgender women share some HIV risk factors with other populations, such as ulcerative sex-  
83 ually transmitted infections (STIs),<sup>2,3</sup> multiple substance use, victimization, intimate partner vio-  
84 lence,<sup>4</sup> unprotected sex,<sup>5</sup> multiple sex partners,<sup>6</sup> and injecting drug use.<sup>5-7</sup>

85 However, transgender women encounter additional and unique biological, social, cul-  
86 tural, legal and economic issues, which increase their vulnerability to HIV. Transgender women  
87 are marginalized legally and economically through discriminative legislation and practice, which  
88 accelerates their vulnerability to HIV infection by confining their job options to sex work. Sex  
89 work in turn exacerbates their stigmatization and alienation,<sup>8</sup> and further increases their HIV  
90 risk.<sup>9,10</sup> Stigmatization and discrimination further increase the risk of HIV infection by prevent-  
91 ing transgender women from seeking essential health information and services.<sup>11</sup> Depression  
92 and low self-esteem, which are common psychological consequences of stigma, further weak-  
93 ens the bargaining power for condom use in sexual relationships, resulting in heightened vul-  
94 nerability to HIV infection.<sup>5,12-15</sup> Transgender women who have sex with men often engage in  
95 receptive anal intercourse, which increases their risk of HIV acquisition, compared to insertive  
96 sexual partners.<sup>2</sup> Syndemics of illicit drug use, abuse by family members, and mental health of-  
97 ten occur together;<sup>16</sup> and are often associated with less likelihood of transgender women to use  
98 condoms during sex with commercial partners.<sup>17</sup> In addition, the confluence of arbitrary ar-  
99 rests,<sup>18,19</sup> violence,<sup>16,20</sup> economic pressures,<sup>21</sup> and other social problems further aggravate  
100 mental health risks among transgender women, causing them to engage in risky sexual behav-  
101 iors.<sup>6,17</sup>

102 In Southeast Asia, a systematic review of studies from Indonesia, Thailand and Vietnam  
103 demonstrated that transgender women are particularly at high HIV risk, with an estimated HIV

1  
2  
3 104 prevalence of 26.1%, 12.2% and 6.7%, respectively.<sup>1</sup> In Cambodia, up to 2012, transgender  
4  
5 105 women were traditionally included in HIV prevention programs targeting men who have sex  
6  
7 106 with men (MSM). As a result, their unique needs were not reflected in HIV programs' goals.<sup>22</sup>  
8  
9 107 There was also a lack of transgender women-specific data to quantify the number reached by  
10  
11 108 outreach programs and services. In 2012, the first Integrated Biological and Behavioral Survey  
12  
13 109 (IBBS) that specifically included transgender women in Cambodia found an HIV prevalence of  
14  
15 110 4.2% among this population,<sup>22</sup> which was six times higher than the 0.7% prevalence among the  
16  
17 111 general adult population aged 15-45,<sup>23</sup> and about twice higher than the 2.1% among MSM.<sup>24</sup>  
18  
19 112 This 2012 study also found that older age (>35 years), residing in Siem Reap province (a major  
20  
21 113 tourist site), having sex during or after drug use, not using a condom during the last anal sex,  
22  
23 114 and low self-esteem were associated with HIV infection among transgender women.<sup>22</sup>

24 115 Recognizing the differences in HIV vulnerability and prevention needs between  
25  
26 116 transgender women and MSM, in 2013 the National Center for HIV/AIDS, Dermatology and STD  
27  
28 117 (NCHADS) separated these two populations in its revised Standard Operating Procedure (SOP)  
29  
30 118 known as Boosted Continuum of Prevention, Care and Treatment (B-CoPCT).<sup>25</sup> Transgender  
31  
32 119 women have since been considered a distinct at-risk group for HIV surveillance and programing.  
33  
34 120 The National B-CoPCT approach aims to increase the uptake of HIV testing and counseling (HTC)  
35  
36 121 and other related services, ensure the quality of outreach and strengthen service delivery to  
37  
38 122 meet specific needs of key populations, including transgender women, in-order to achieve  
39  
40 123 Cambodia's 3.0 goal (i.e. zero new HIV infection, zero discrimination, and zero AIDS-related  
41  
42 124 deaths) by 2020.

43 125 This study was conducted to explore the HIV prevalence and identify risk factors associ-  
44  
45 126 ated with HIV infection among transgender women in Cambodia. The study findings will help  
46  
47 127 determine ways in which services and policies can be tailored for this key population.  
48

49 128

## 50 129 **METHODS**

### 51 130 **Study design and sites**

52  
53  
54 131 Between December 2015 and February 2016, a cross-sectional study was conducted in the capi-  
55  
56 132 tal city of Phnom Penh and 12 provinces namely Battambang, Banteay Meanchey, Kampong  
57  
58  
59  
60

1  
2  
3 133 Cham, Kandal, Koh Kong, Kampong Chhnang, Kampong Speu, Prey Veng, Preah Sihanouk, Siem  
4  
5 134 Reap, Svay Rieng and Tbong Khmum. These sites were purposively selected from the 23 HIV  
6  
7 135 high-burden operational districts identified by NCHADS.<sup>26 27</sup> The study was a combination of a  
8  
9 136 biological (blood test) and behavioral (face-to-face interview) survey using Respondent Driven  
10  
11 137 Sampling (RDS) method to reach the target population.

12  
13 138

### 14 139 **Sample size and sampling procedures**

15  
16 140 The sample size calculation was based on an assumption that HIV prevalence would have  
17  
18 141 changed between the first and the current IBBS. The minimum sample size required for this  
19  
20 142 study was 1,380, which would result in sufficient power to detect a priori significant difference  
21  
22 143 in HIV prevalence, as expressed in the following null and alternative hypotheses. The hypothesis  
23  
24 144 test was that of one-sample proportion in comparison to the null hypothesis.

25  
26 145 The null hypothesis ( $H_0$ ): HIV prevalence among transgender women remains constant at  
27  
28 146 4.2%, similar to that found in the 2012 IBBS.

29  
30 147 The alternative hypothesis ( $H_a$ ): HIV prevalence among transgender women has decreased  
31  
32 148 by 1.2% from 4.2% in 2012 to 3.0% in the present IBBS.

33  
34 149

35 150 The sample size was calculated using the following formula and assumptions:

$$n = \frac{p_0q_0 \left( z_{1-\alpha} + z_{1-\beta} \sqrt{p_1q_1/p_0q_0} \right)^2}{(p_1 - p_0)^2}$$

37  
38 151

39  
40  
41  
42  
43 152 ▪  $P_0$  = estimated proportion in  $H_0$  (In the most recent survey, HIV prevalence among TG  
44  
45 153 women was 4.2% in 2012.)

46  
47 154 ▪  $P_1$  = estimated proportion in  $H_a$  (The expected HIV prevalence among TG women in the  
48  
49 155 current study is about 3.0 %)

50  
51 156 ▪  $Z_{(1-\alpha)}$  = significance level at 5% in response to one-sided test (Z score = 1.645)

52  
53 157 ▪  $Z(1-\beta)$  = power level of 80% (Z score = 0.83)

54  
55 158 ▪ Refusal rate of 10%

56  
57 159 ▪ Design effect is assumed to be one.

58  
59  
60

1  
2  
3 160  
4  
5 161 This sample size was stratified by study site. Roughly half of the estimated transgender  
6  
7 162 women in each study site were recruited. However, in five provinces where the estimated  
8  
9 163 number of transgender women was smaller than 100, all transgender women were recruited.  
10  
11 164 Potential participants were included in the study if they: (1) were biologically male at birth and  
12  
13 165 self-identified as a woman or third gender, (2) were Khmer-speaking, (3) were at least 18 years  
14  
15 166 old at the time of screening, (4) reported having had sex with at least one man within the past  
16  
17 167 12 months and (5) were able and willing to provide an informed consent.

18  
19 168 Among the 13 study sites, data collection was conducted in 20 locations (six locations in  
20  
21 169 Phnom Penh and 14 locations in the remaining provinces). The number of the selected loca-  
22  
23 170 tions was determined based on the required sample size in each study site. Our participants,  
24  
25 171 including the seeds and the people the seeds referred, had to meet the eligibility criteria. These  
26  
27 172 participants were recruited from the entire transgender population in the study sites. However,  
28  
29 173 the initial seeds at each site were recruited through our implementing partners. First, four  
30  
31 174 “seeds” (two seeds aged 18 to 24 and two seeds 25 or older) who were well connected with  
32  
33 175 other transgender women in each location were selected by outreach workers from imple-  
34  
35 176 menting partners (local NGOs) based in the selected locations. These seeds had to meet the  
36  
37 177 above-mentioned eligibility criteria for participation and have an established and large social  
38  
39 178 network consisting of 10 or more other transgender women in their given location. Eligibility to  
40  
41 179 participate as a seed was determined by the leader of the data collection team, using a paper-  
42  
43 180 based eligibility form.

44  
45 181 Second, each seed was given a personal identity number (PIN) and enrolled in the study.  
46  
47 182 Third, each seed was given three coupons and asked to refer three additional transgender  
48  
49 183 women. US\$2 was given to each seed for a successful referral. Each seed was expected to ex-  
50  
51 184 tend to three to six “recruitment waves” in each location. If the initial seeds did not recruit  
52  
53 185 participants, or if enrollment was halted because all recruitment chains had “dried up” (i.e.  
54  
55 186 stopped recruiting), additional seeds were selected. In total, 80 seeds were selected by the out-  
56  
57 187 reach workers, and a total of 1,375 transgender women were enrolled in the study. Referred  
58  
59 188 participants were initially screened by the data collectors for eligibility.  
60

1  
2  
3 1894  
5 190 **Data collection training**

6  
7 191 Data were collected by three teams; each team comprised of one field supervisor, five inter-  
8  
9 192 viewers, one lab technician and one counselor. Lab technicians and counselors were from the  
10  
11 193 Municipal or Provincial AIDS and STI Program of the study sites. Data collection teams were  
12  
13 194 trained for three days on study protocol, research ethics, interview techniques and data collec-  
14  
15 195 tion procedures provided by the principle investigators and research coordinators.

16 196

17  
18 197 **Data collection procedures**19  
20 198 *Biological data collection*

21  
22 199 To determine HIV prevalence, all participants received onsite rapid finger-prick testing. Pre-test  
23  
24 200 counseling was provided by qualified, well-trained counselors working for voluntary confiden-  
25  
26 201 tial counseling and testing (VCCT) centers. Participants could receive their HIV-test result ver-  
27  
28 202 bally after the questionnaire interview. A blood sample was obtained from each participant by a  
29  
30 203 trained laboratory technician through finger-prick and tested for HIV using Determine™ test, in  
31  
32 204 keeping with the national protocol.<sup>28</sup> Post-test counseling was provided for each participant  
33  
34 205 regardless of their HIV test result by the same counselor who conducted the pre-test counseling  
35  
36 206 in accordance with NCHADS HIV testing guidelines.<sup>28</sup> Participants who were HIV reactive and  
37  
38 207 did not know their HIV status were referred by the counselor for confirmatory testing at the  
39  
40 208 nearest VCCT center. The quality of HIV tests was monitored using quality control samples. Dis-  
41  
42 209 cordant results between the screening and confirmatory tests were investigated to elucidate  
43  
44 210 potential causes and minimize potential erroneous results. In the case of human error, individ-  
45  
46 211 uals performing screening tests were retrained before resuming their involvement in the study.

47 212 After HIV testing, the participant was interviewed by a well-trained interviewer using a  
48  
49 213 computer-assisted survey instrument (CASI). The questionnaire was set up in Qualtrics, a web-  
50  
51 214 based application, and run on an Android tablet. HIV testing and interviews were conducted in  
52  
53 215 the selected 20 locations including drop-in centers, private houses and offices of implementing  
54  
55 216 partners, depending on participants' convenience.

56 217  
57  
58  
59  
60

### 218 *Questionnaire development and measures*

219 The questionnaire was developed using standardized and validated tools adapted from TGIBBS-  
220 2012,<sup>22</sup> FHI 360's guideline for Behavioral Surveillance Survey (BSS)<sup>29</sup> and NCHADS's Boosted-  
221 CoPCT<sup>25</sup> to measure key variables related to the objectives of the study. The questionnaire was  
222 initially drafted in English and translated into Khmer, the national language of Cambodia. Con-  
223 sultative meetings to improve the draft questionnaire were held with representatives of  
224 transgender women, communities and NGOs working with transgender women, as well as re-  
225 searchers and practitioners working on HIV and AIDS in Cambodia. The questionnaire was pre-  
226 tested with 20 transgender women in Phnom Penh and finalized based on findings.

227 The questionnaire collected information on socio-economic characteristics, transgender  
228 identity and related experiences, sexual behaviors and condom use with different types of sex-  
229 ual partners, HIV/STI screening and care seeking behaviors, substance use and exposure to HIV  
230 programs. For details of the questionnaire, please see Supplementary File 1.

231

### 232 **Data analyses**

233 HIV prevalence was calculated by dividing the total number of participants with HIV reactive  
234 test results with the total number of participants. To examine the associated factors of HIV in-  
235 fection, we conducted both bivariate and multivariable analyses. In the bivariate analyses, we  
236 compared all characteristics and behavioral variables of participants with a reactive test result  
237 to those of participants with a non-reactive test result. Among participants who tested HIV pos-  
238 itive, additional analyses were conducted to assess whether there was a significant difference in  
239 sexual behaviors of those who were aware of their HIV-positive status and of those who were  
240 not. Chi-square test or Fisher's exact test (for an expected cell value of  $\leq 5$ ) was used for cate-  
241 gorical variables, while Student's *t*-test was used for continuous variables. To facilitate the  
242 model, some continuous variables, such as age were transformed to categorical variables. A  
243 multivariable logistic regression model was constructed to examine independent factors associ-  
244 ated with HIV infection. Variables with a significance level of  $p < 0.05$  in the bivariate analyses  
245 were simultaneously included in the model. Backward elimination method was then used to



1  
2  
3 246 eliminate variables with the highest  $p$ -value one-by-one from the model. STATA Version 12.0  
4  
5 247 for Windows (Stata Corp, TX, USA) was used to conduct the data analyses.  
6

7 248

8  
9 249 **ETHICAL STATEMENT**

10 250 Participation in this study was voluntary, and a written informed consent was obtained from  
11  
12 251 each study participant after a detailed description of the study objective and procedures was  
13  
14 252 explained to them. Participants were informed that they could stop responding to questions  
15  
16 253 and discontinue their participation at any time. Interviews were conducted at a private place,  
17  
18 254 and confidentiality was enhanced by assigning a unique and anonymous code to each partici-  
19  
20 255 pant. No personal identifiers were contained in the questionnaires or dataset. The study proto-  
21  
22 256 col was approved by the National Ethics Committee for Health Research (NECHR) of the Minis-  
23  
24 257 try of Health, Cambodia (No. 420 NECHR) and FHI 360's Protection of Human Subjects Commit-  
25  
26 258 tee (PHSC No. 713897).  
27

28 259

29  
30 260 **RESULTS**

31 261 **HIV prevalence**

32  
33 262 Of 1,375 participants tested, 81 (5.9%) had an HIV reactive test; of whom, 42 (52%) were not  
34  
35 263 aware of their HIV status prior to the study. Out of the 39 cases who already knew their status,  
36  
37 264 37 (94.9%) were currently on HIV treatment, with the other two reporting having dropped out  
38  
39 265 of the treatment.  
40

41 266

42  
43 267 **Socio-demographic characteristics**

44 268 As shown in Table 1, the majority of the participants (83.4%) were recruited from urban com-  
45  
46 269 munities; 53.0% were younger than 25 years old and 97.2% had never been married. More than  
47  
48 270 two-thirds of participants (68.6%) had completed high school, and 9.1% had a higher education.  
49  
50 271 The most common main occupations reported by the participants were hair dress-  
51  
52 272 ers/beauticians (35.1%), laborers/farmers (17.5%) and entertainment workers (14.8%). More  
53  
54 273 than one-third of participants (38.6%) reported an average monthly income in the past six  
55  
56 274 months of US\$ 100-199, while 16.5% reported it to be more than US\$ 300. Regarding gender  
57  
58  
59  
60

identity, 42.2% identified themselves as female, while 57.2% identified themselves as third gender. Almost half (48.0%) of the participants reported dressing as a woman all the time; 45% ever used hormone/non-hormone substance; and 14.0% ever injected hormones.

HIV prevalence was significantly higher among participants living in urban communities compared to participants living in rural communities (6.5% vs. 2.6%;  $p= 0.02$ ). The HIV prevalence was also significantly different by age group: 3.0% of participants in the age group of 18-24, 8.2% in 25-34, 13.1% in 35-44 and 11.4% in 45 or older ( $p< 0.001$ ). HIV prevalence was also significantly higher among those who never attended school or dropped out of primary school when compared to those who at least attended high school or higher (10.4% vs. 8.0%;  $p=<0.001$ ). In addition, HIV prevalence was significantly higher among transgender women who were NGO staff (mainly HIV focused NGOs) (20.6%) and those who were unemployed (9.4%) ( $p= 0.03$ ). HIV prevalence was significantly higher among transgender women who reported dressing as women all the time (8.5% vs. 3.5%,  $p= 0.001$ ), among those who ever used female hormones (8.1% vs. 4.1%,  $p= 0.02$ ) and among those who ever injected hormones (9.1% vs. 5.2%,  $p= 0.002$ ). Moreover, HIV prevalence was significantly higher among transgender women who reported never using online services developed specifically for MSM or transgender women, such as Facebook group pages or various websites (9.5% vs. 3.9%,  $p< 0.001$ ).

**Table 1** Comparison of socio-demographic, gender identity and hormone use characteristics of transgender women with and without a reactive HIV test

| Socio-demographics, gender identity and hormone use | Total<br>( <i>n</i> = 1375) | HIV test result              |                                    | <i>P</i> -value* |
|-----------------------------------------------------|-----------------------------|------------------------------|------------------------------------|------------------|
|                                                     |                             | Reactive<br>( <i>n</i> = 81) | Non-reactive<br>( <i>n</i> = 1294) |                  |
|                                                     | <i>n</i> (%)                | <i>n</i> (%)                 | <i>n</i> (%)                       |                  |
| Community type                                      |                             |                              |                                    |                  |
| Urban                                               | 1146 (83.4)                 | 75 (6.5)                     | 1071 (93.5)                        | 0.02             |
| Rural                                               | 229 (16.6)                  | 6 (2.6)                      | 223 (97.4)                         |                  |

## Age in years

|        |            |           |            |        |
|--------|------------|-----------|------------|--------|
| 18- 24 | 729 (53.0) | 22 (3.0)  | 707 (97.0) | <0.001 |
| 25-34  | 503 (36.6) | 41 (8.2)  | 462 (91.8) |        |
| ≥35    | 143 (10.4) | 18 (12.6) | 125 (87.4) |        |

## Current marital status

|                            |             |          |             |      |
|----------------------------|-------------|----------|-------------|------|
| Married                    | 7 (0.5)     | 0 (0.0)  | 7 (100)     | 0.47 |
| Widowed/divorced/separated | 18 (1.3)    | 1 (5.6)  | 17 (94.4)   |      |
| Never married              | 1334 (97.2) | 78 (5.9) | 1256 (94.1) |      |
| Refused to answer          | 16 (1.2)    | 2 (15.4) | 11 (84.6)   |      |

## Years of formal education completed

|                                  |             |           |             |        |
|----------------------------------|-------------|-----------|-------------|--------|
| Primary (0-6 years)              | 307 (22.3)  | 32 (10.4) | 275 (89.6)  | <0.001 |
| High school or higher (>7 years) | 1068 (77.7) | 49 (4.6)  | 1019 (95.4) |        |

## Main occupation

|                         |            |          |            |      |
|-------------------------|------------|----------|------------|------|
| Unemployed              | 64 (4.7)   | 6 (9.4)  | 58 (90.6)  | 0.03 |
| Hair dresser/beautician | 482 (35.1) | 24 (5.0) | 458 (95.0) |      |
| Office worker           | 50 (3.6)   | 3 (6.0)  | 47 (94.0)  |      |
| Labor/farmer            | 241 (17.5) | 15 (6.2) | 226 (93.8) |      |
| Seller                  | 149 (10.8) | 10 (6.7) | 139 (93.3) |      |
| Entertainment Worker    | 203 (14.8) | 10 (4.9) | 193 (95.1) |      |
| Student                 | 108 (7.9)  | 1 (0.9)  | 107 (99.1) |      |
| NGO staff               | 34 (2.5)   | 7 (20.6) | 27 (79.4)  |      |

1  
2  
3  
4  
5  
6  
7  
8  
9  
10  
11  
12  
13  
14  
15  
16  
17  
18  
19  
20  
21  
22  
23  
24  
25  
26  
27  
28  
29  
30  
31  
32  
33  
34  
35  
36  
37  
38  
39  
40  
41  
42  
43  
44  
45  
46  
47  
48  
49  
50  
51  
52  
53  
54  
55  
56  
57  
58  
59  
60

|                                                               |              |          |             |       |
|---------------------------------------------------------------|--------------|----------|-------------|-------|
| Other                                                         | 44 (3.2)     | 5 (11.4) | 39 (88.6)   |       |
| Monthly income in the past 6 months (USD)                     |              |          |             |       |
| < 100                                                         | 351 (25.6)   | 22 (6.3) | 329 (93.7)  | 0.70  |
| 100-199                                                       | 530 (38.6)   | 29 (5.5) | 501 (94.5)  |       |
| 200-299                                                       | 266 (19.3)   | 19 (7.1) | 247 (92.9)  |       |
| ≥300                                                          | 226 (16.5)   | 11 (4.9) | 215 (95.1)  |       |
| Gender identity (self-identified)                             |              |          |             |       |
| Female                                                        | 580 (42.2)   | 29 (5.0) | 551 (95.0)  | 0.35  |
| Third gender                                                  | 786 (57.2)   | 52 (6.6) | 734 (93.4)  |       |
| Uncertain                                                     | 8 (0.6)      | 0 (0.0)  | 8 (100)     |       |
| Frequency of dressing as a woman                              |              |          |             |       |
| All the time                                                  | 660 (48.0)   | 56 (8.5) | 604 (91.5)  | 0.001 |
| Not all the time                                              | 715 (52.0)   | 25 (3.5) | 689 (96.5)  |       |
| Ever injected hormones                                        |              |          |             |       |
| No                                                            | 1123 (81.7)  | 58 (5.2) | 1065 (94.8) | 0.02  |
| Yes                                                           | 252 (18.3)   | 23 (9.1) | 229 (90.9)  |       |
| Ever self-injected hormones                                   |              |          |             |       |
| No                                                            | 1,358 (98.8) | 77 (5.7) | 1281 (94.3) | 0.002 |
| Yes                                                           | 17 (1.2)     | 4 (25.5) | 13 (76.5)   |       |
| Ever shared needles when injecting hormones/beauty substances |              |          |             |       |
| No                                                            | 1355 (98.5)  | 78 (5.8) | 550 (94.2)  | 0.33  |

|                                                                         |            |          |            |        |
|-------------------------------------------------------------------------|------------|----------|------------|--------|
| Yes                                                                     | 20 (3.2)   | 2 (10.0) | 18 (90.0)  |        |
| Ever used online services developed for MSM/TG (e.g. Facebook, website) |            |          |            |        |
| No                                                                      | 483 (35.1) | 46 (9.5) | 437 (90.5) | <0.001 |
| Yes                                                                     | 892 (64.9) | 35 (3.9) | 857 (96.1) |        |

Abbreviations: HIV, human immunodeficiency virus; USD, United States dollar.

\*Chi-square or Fisher's exact test was used as appropriate.

### Sexual behaviors

Sexual behaviors among transgender women with reactive and non-reactive HIV test are shown in Table 2. An overwhelming majority of study participants (87.5%) reported only having had receptive anal sex in the past 12 months. Of the total, 86.0% reported having had anal sex with at least one man within the previous three months, with the median number of male sex partners in the past three months being three (IQR 1-9). Of those who were sexually active with men in the past three months, 61.9% reported having used a condom at last sex with a man.

A total of 94.8% of participants who had anal sex in the prior three months reported having at least one non-transactional male sex partner within the past three months; of which, 62.1% reported always using condoms with their non-transactional male sex partners. Of participants who had sex in the past three months, 41.8% reported having sex with at least one man in exchange for money or gift; of whom 60.0% reported always using condoms with the partners.

Table 2 also shows that HIV prevalence was significantly higher among participants who reported having had anal sex with a man in the past three months (6.5% vs. 2.1%,  $p=0.02$ ) and among those who reported having had sex with at least one man in exchange for money or gift in the prior three months (8.1% vs. 5.4%,  $p=0.04$ ) compared to participants who did not report these sexual behaviors.

**Table 2** Comparisons of sexual behaviors among transgender women with reactive and non-reactive HIV test

| Sexual behaviors | Total | HIV test result |
|------------------|-------|-----------------|
|------------------|-------|-----------------|

|                                                                                  | (n= 1375)   | Reactive<br>(n= 81) | Non-reactive<br>(n= 1294) |          |
|----------------------------------------------------------------------------------|-------------|---------------------|---------------------------|----------|
|                                                                                  | n (%)       | n (%)               | n (%)                     | P-value* |
| Role in anal sex with a man (past 12 months)                                     |             |                     |                           |          |
| Insertive                                                                        | 29 (2.2)    | 1 (3.5)             | 28 (96.5)                 | 0.73     |
| Receptive                                                                        | 1145 (87.5) | 72 (6.3)            | 1073 (93.7)               |          |
| Both                                                                             | 135 (10.3)  | 7 (5.2)             | 128 (94.8)                |          |
| Had anal sex with a man (past 3 months)                                          |             |                     |                           |          |
| No                                                                               | 192 (14.0)  | 4 (2.1)             | 188 (97.9)                | 0.02     |
| Yes                                                                              | 1183 (86.0) | 77 (6.5)            | 1106 (93.5)               |          |
| Number of male sexual partners (past 3 months)                                   |             |                     |                           |          |
| <2                                                                               | 512 (37.3)  | 24 (4.7)            | 488 (95.3)                | 0.14     |
| ≥2                                                                               | 861 (62.7)  | 57 (6.6)            | 804 (93.4)                |          |
| Used a condom at last sex (past 3 months)                                        |             |                     |                           |          |
| No                                                                               | 451 (38.1)  | 27 (6.0)            | 423 (94.0)                | 0.57     |
| Yes                                                                              | 732 (61.9)  | 50 (6.8)            | 682 (93.2)                |          |
| Had anal sex with a man, not in exchange for money or gift (past 3 months)       |             |                     |                           |          |
| No                                                                               | 61 (5.2)    | 5 (8.2)             | 56 (91.8)                 | 0.37     |
| Yes                                                                              | 1122 (94.8) | 72 (6.4)            | 1050 (93.6)               |          |
| Number of male sexual partner, not in exchange for money or gift (past 3 months) |             |                     |                           |          |
| < 2                                                                              | 357 (31.9)  | 24 (6.7)            | 333 (93.3)                | 0.78     |

|                                                                                       |            |          |            |      |
|---------------------------------------------------------------------------------------|------------|----------|------------|------|
| ≥2                                                                                    | 763 (68.1) | 48 (6.3) | 715 (93.7) |      |
| Condom use with male sexual partner not in exchange for money or gift (past 3 months) |            |          |            |      |
| Not always                                                                            | 697 (62.1) | 50 (7.2) | 647 (92.8) | 0.19 |
| Always                                                                                | 425 (37.9) | 22 (5.2) | 403 (94.8) |      |
| Had anal sex with a man in exchange for money or gift (past 3 months)                 |            |          |            |      |
| No                                                                                    | 688 (58.2) | 37 (5.4) | 651 (94.6) | 0.04 |
| Yes                                                                                   | 495 (41.8) | 40 (8.1) | 455 (91.9) |      |
| Number male sexual partners in exchange for money/gifts (past 3 months)               |            |          |            |      |
| < 2                                                                                   | 161 (32.5) | 12 (7.5) | 149 (92.6) | 0.72 |
| ≥2                                                                                    | 334 (67.5) | 28 (8.4) | 306 (91.6) |      |
| Condom use with male sexual partner in exchange for money or gifts (past 3 months)    |            |          |            |      |
| Not always                                                                            | 164 (40.0) | 12 (7.3) | 152 (92.7) | 0.56 |
| Always                                                                                | 246 (60.0) | 22 (8.9) | 224 (91.1) |      |

319 *Abbreviation: HIV, human immunodeficiency virus.*

320 *\*Chi-square test or Fisher's exact test was used as appropriate.*

### 322 **Sexual behaviors and awareness of HIV status**

323 Among the participants who had HIV reactive tests, additional analyses were conducted to see  
 324 if there were differences in sexual behaviors among those who self-reported a positive status  
 325 and those who did not. Participants who did not report or were unaware of their positive status  
 326 were significantly less likely to report using a condom at last sexual intercourse (52.4% vs.  
 327 79.0%,  $p=0.01$ ). No other significant differences were found.

### 329 **Sexually transmitted infections (STIs)**

330 Overall, 14.0% of participants reported having had at least one STI symptom in the past 12  
 331 months. Anal and perianal symptoms were most commonly reported (6.1%). As shown in Table  
 332 3, HIV prevalence was significantly higher among participants who reported having had an STI  
 333 symptom compared to that among participants who did not have an STI symptom in the past  
 334 12 months (11.4% vs. 5.0%;  $p < 0.001$ ). HIV prevalence was also significantly higher among par-  
 335 ticipants who reported having had an ulceration or sore in the genital area in the past 12  
 336 months compared to that among participants who did not have it (15.2% vs. 5.6%;  $p < 0.001$ ).

337  
 338 **Table 3** Comparisons of STI symptoms among transgender women with reactive and non-  
 339 reactive HIV test

| STI symptoms                                             | Total<br>( <i>n</i> = 1375) | HIV test result              |                                    | P-value* |
|----------------------------------------------------------|-----------------------------|------------------------------|------------------------------------|----------|
|                                                          |                             | Reactive<br>( <i>n</i> = 81) | Non-reactive<br>( <i>n</i> = 1294) |          |
|                                                          | n (%)                       | n (%)                        | n (%)                              |          |
| Had experienced any STI symptom (past 12 months)         |                             |                              |                                    |          |
| No                                                       | 1182 (86.0)                 | 59 (5.0)                     | 1123 (95.0)                        | <0.001   |
| Yes                                                      | 193 (14.0)                  | 22 (11.4)                    | 171 (88.6)                         |          |
| Ulceration or sores around the genitals (past 12 months) |                             |                              |                                    |          |
| No                                                       | 1329 (96.7)                 | 74 (5.6)                     | 1255(94.4)                         | <0.001   |
| Yes                                                      | 46 (3.4)                    | 7 (15.2)                     | 39 (84.8)                          |          |
| Swelling around the genitals (past 12 months)            |                             |                              |                                    |          |
| No                                                       | 1359 (98.8)                 | 80 (5.9)                     | 1279 (94.1)                        | 1.000    |
| Yes                                                      | 16 (1.2)                    | 1 (6.3)                      | 15 (93.7)                          |          |
| Abnormal urethral discharge (past 12 months)             |                             |                              |                                    |          |



|     |             |          |            |      |
|-----|-------------|----------|------------|------|
| No  | 1339 (97.4) | 77 (5.8) | 1262(94.2) | 0.16 |
| Yes | 36 (2.6)    | 4 (11.1) | 32 (88.9)  |      |

STI symptoms around the anus (past 12 months)

|     |             |          |             |      |
|-----|-------------|----------|-------------|------|
| No  | 1291 (93.9) | 73 (5.6) | 1218 (94.4) | 0.15 |
| Yes | 84 (6.1)    | 8 (9.52) | 76 (90.48)  |      |

STI symptoms in the mouth or throat (past 12 months)

|     |             |           |             |      |
|-----|-------------|-----------|-------------|------|
| No  | 1336 (97.2) | 76 (5.7)  | 1260 (94.3) | 0.07 |
| Yes | 39 (2.8)    | 5 (12.82) | 34 (87.18)  |      |

Abbreviations: HIV, human immunodeficiency virus; STI, sexually transmitted infections.

\*Chi-square or Fisher's exact test was used as appropriate.

### Substance use

As shown in Table 5, the majority (75.9%) of participants reported drinking at least one can of beer or a glass of wine in the past 3 months, while 10.1% reported using amphetamine-type stimulants (Yama, Crystal Ice, Ecstasy), and 0.9% reported using other drugs (marijuana, heroin, etc.) in the previous 12 months. Of total, 1.5% reported having injected any illicit drugs in the past three months.

Table 4 also shows that HIV prevalence was significantly higher among participants who did not drink alcohol when compared to that among participants who reported drinking at least one can of beer or a glass of wine in the past three months (8.5% vs. 5.1%;  $p = 0.02$ ). Moreover, HIV prevalence was significantly higher among participants who reported injecting any illicit drugs in the past three months compared to participants who did not (15.0% vs. 5.8%,  $p = 0.01$ ).

**Table 4** Comparisons of substance use among transgender women with reactive and non-reactive HIV test

| Substance use                                                          | Total<br>(n= 1375) | HIV test result     |                           | P-value* |
|------------------------------------------------------------------------|--------------------|---------------------|---------------------------|----------|
|                                                                        |                    | Reactive<br>(n= 81) | Non-reactive<br>(n= 1294) |          |
|                                                                        | n (%)              | n (%)               | n (%)                     |          |
| Drank at least one can of beer or glass of wine in the past 3 months   |                    |                     |                           |          |
| No                                                                     | 331 (24.1)         | 28 (8.5)            | 303 (91.5)                | 0.02     |
| Yes                                                                    | 1042 (75.9)        | 53 (5.1)            | 989 (94.9)                |          |
| Frequency of having more than 5 drinks in one day in the past 3 months |                    |                     |                           |          |
| Never more than five drinks                                            | 336 (24.4)         | 28 (8.3)            | 308 (91.7)                | 0.17     |
| Less than once a month                                                 | 771 (56.1)         | 40 (5.2)            | 731 (94.8)                |          |
| 1-3 times a week                                                       | 157 (11.4)         | 9 (5.7)             | 148 (94.3)                |          |
| 4 or more times a week                                                 | 111 (8.1)          | 4 (3.6)             | 107 (96.4)                |          |
| Used illicit drugs in the past 12 months                               |                    |                     |                           |          |
| Never                                                                  | 1224 (89.0)        | 72(5.9)             | 1152 (94.1)               | 0.74     |
| Yes, ATS (yama, crystal ice, ecstasy)                                  | 139 (10.1)         | 8 (5.8)             | 131 (94.2)                |          |
| Other (marijuana, heroin, etc.)                                        | 12 (0.9)           | 1 (8.3)             | 11 (91.7)                 |          |
| Injected any illicit drugs in the past 3 months                        |                    |                     |                           |          |
| No                                                                     | 1355 (98.6)        | 78 (5.8)            | 1277 (94.2)               | 0.01     |
| Yes                                                                    | 20 (1.5)           | 3 (15.0)            | 17 (85.0)                 |          |
| Had sex during/after using illicit drugs in the past 3 months          |                    |                     |                           |          |
| No                                                                     | 1286 (93.5)        | 76 (5.9)            | 1210 (94.1)               | 1.00     |

Yes 89 (6.5) 5 (5.6) 84 (94.4)

Abbreviation: ATS, amphetamine-type stimulant; HIV, human immunodeficiency virus.

\*Chi-square or Fisher's exact test was used as appropriate.

### Factors associated with HIV infection

Table 5 presents independent factors associated with HIV infection in multivariable logistic regression analyses. After adjustment for other covariates, participants living in urban areas were twice as likely to be HIV infected as those living in rural areas (AOR= 2.7, 95% CI= 1.1-6.5). Participants with primary education were 1.7 times as likely to be infected compared to those with high school education (AOR=1.7, 95% CI= 1.0-2.9). HIV infection increased with age; compared to those aged 18-24, the odds of being HIV infected were twice as high among transgender women aged 25-34 (AOR= 2.1, 95% CI= 1.2-3.6) and 2.8 times higher among those aged  $\geq 35$  (AOR= 2.8, 95% CI= 1.3-6.1). Self-injection of gender affirming hormones was associated with a four-fold increase in the odds of HIV infection (AOR= 4.4, 95% CI= 1.1-17.3). A history of genital sores over the previous 12 months increased the odds of HIV infection by three-fold (AOR= 3.0, 95% CI= 1.2-7.8). Transgender women with stronger feminine identity, dressing as a woman all the time were twice as likely to be HIV infected compared to those who did not dress as a woman all the time (AOR= 2.1, 95% CI= 1.2-3.8). Having never used online services developed for transgender women in the past six months was also associated with higher odds of being HIV infected (AOR= 1.9, 95% CI= 1.2-3.2).

**Table 5** Factors associated with HIV infection in multivariate logistic regression model

| Variables in the final model | AOR (95% CI)  | P-value |
|------------------------------|---------------|---------|
| Community type               |               |         |
| Rural                        | Reference     |         |
| Urban                        | 2.7 (1.1-6.5) | 0.03    |
| Formal education attained    |               |         |

|                                                                                     |                |      |
|-------------------------------------------------------------------------------------|----------------|------|
| Primary (0–6 years)                                                                 | 1.7 (1.1-2.9)  | 0.04 |
| High school or higher (≥7)                                                          | Reference      |      |
| Age in years                                                                        |                |      |
| <25                                                                                 | Reference      |      |
| 25-34                                                                               | 2.1 (1.2-3.6)  | 0.01 |
| ≥35                                                                                 | 2.6 (1.3-5.4)  | 0.01 |
| Frequency of express and/or dressing as a woman                                     |                |      |
| Not all the time                                                                    | Reference      |      |
| All the time                                                                        | 2.1 (1.2-3.8)  | 0.01 |
| Ever self-injected hormone                                                          |                |      |
| No                                                                                  | Reference      |      |
| Yes                                                                                 | 4.4 (1.1-17.3) | 0.03 |
| Ulcerations or sores in the genital area in the past 12 months                      |                |      |
| No                                                                                  | Reference      |      |
| Yes                                                                                 | 3.0 (1.2-7.8)  | 0.02 |
| Used online services developed MSM/TG in the past 6 months (e.g. Facebook, website) |                |      |
| No                                                                                  | 1.9 (1.2-3.2)  | 0.01 |
| Yes                                                                                 | Reference      |      |

379 *Abbreviations: AOR, adjusted odds ratio; CI, confidence interval; HIV, human immunodeficiency virus.*

380 *\*Variables in the table were the ones that remained statistically significant after several steps of model*

381 *fitting.*

382

## DISCUSSION

This study reveals an HIV prevalence of 5.9% among transgender women in Cambodia. This prevalence was about 20 times higher than the 0.3% among women attending antenatal care clinics in 2014 who represent the general adult population aged 15-45,<sup>30</sup> and about 2.5 times higher than the 2.3% among MSM in 2014.<sup>26</sup> This observed prevalence emphasizes that transgender women in Cambodia are at high risk of HIV, and is consistent with global literature regarding the high burden of HIV among this transgender population.<sup>1</sup>

Although statistically non-significant ( $p= 0.13$ ), the prevalence found in this study was higher than the prevalence of 4.2% reported in the smaller ( $n= 891$ ) TGIBBS conducted in 2012<sup>22</sup> and was therefore contrary to our hypothesized expectations of reduction in HIV prevalence among this population. Recent progress in Cambodia, where 73% of all estimated HIV positive people or 93% of those who have been aware of their positive status are in care,<sup>31</sup> had prompted us to hypothesize the lower prevalence. Although we have no concrete evidence regarding the non-significant increase of HIV prevalence, we suggest that it may be related to the sampling variation in the two surveys. The previous study recruited participants only from the capital city and five provinces (Phnom Penh, Battambang, Banteay Meanchey, Kampong Cham, Siem Reap and Preah Sihanouk),<sup>22</sup> whereas our study expanded to additional eight provinces.

More than half (52%) of those who had HIV reactive tests reported that they had never learned about their HIV positive status before they participated in the study. We believe that this self-reporting of the HIV status is realistic. Since we were concerned that those who were already aware of their HIV status may be unwilling to report their status, we decided to use well-trained counselors who all were from the government's Voluntary Confidential Counseling and Testing (VCCT) centers. These counselors had many years of experience in providing VCCT services and were better equipped to cope with difficult situations. In Cambodia, we believe people are more likely to trust their counselors, as opposed to interviewers. However, as in all self-reported measures, the potential for response bias cannot be entirely ruled out.

This study also reports important findings related to factors associated with HIV infection among transgender women in Cambodia. First, the HIV prevalence among transgender women residing in urban communities was twice as high when compared to that among

1  
2  
3 412 transgender women living in rural communities. This finding is similar to that in a previous  
4  
5 413 study that found a higher HIV prevalence in transgender women living in urban areas of Siem  
6  
7 414 Reap and Phnom Penh, compared to that among transgender women living in other provinc-  
8  
9 415 es.<sup>22</sup> Findings from our study suggest that these differences may not necessarily be attributable  
10  
11 416 to common sexual risk practices. The mean number of sexual partners (8.4 vs. 7.9;  $p= 0.70$ ) and  
12  
13 417 the mean number of male commercial sexual partners (0.7 vs. 0.7;  $p= 0.48$ ) in the past three  
14  
15 418 months among transgender women living in urban and rural communities were not significantly  
16  
17 419 different. In addition, the rates of inconsistent condom use with male non-commercial sexual  
18  
19 420 partners in the past three months were also similar in the two groups (58.0% vs. 62%;  $p= 0.32$ ).

20 421         Given the failure of sexual risk behaviors to sufficiently account for the difference in HIV  
21  
22 422 prevalence, these data suggest that a higher HIV prevalence among sexual partners of  
23  
24 423 transgender women in urban communities may possibly explain the higher probability of urban  
25  
26 424 transgender women to get infected, although this may not be stated with certainty. This is par-  
27  
28 425 ticularly relevant given that previous studies among all transgender women found a higher  
29  
30 426 prevalence of HIV in urban areas.<sup>22</sup> Studies among MSM in Cambodia have also found a higher  
31  
32 427 prevalence of HIV in urban areas.<sup>24 32</sup> In addition, a recent national sentinel survey among  
33  
34 428 women attending antenatal care clinics found that HIV prevalence among women in urban are-  
35  
36 429 as was consistently high,<sup>30</sup> implying that HIV prevalence in urban areas among most popula-  
37  
38 430 tions, who potentially include transgender women and their partners, is high. It is also possible  
39  
40 431 that transgender population in urban communities face unique or additional risks compared to  
41  
42 432 other members of this population in rural areas,<sup>22</sup> which could also contribute to the difference  
43  
44 433 in HIV prevalence between urban and rural communities. Still, it is possible that those who knew  
45  
46 434 they were positive may have moved to urban centers for care and treatment, which unfortunately can-  
47  
48 435 not be examined further in this cross-sectional study. Further research is needed with regard to this  
49  
50 436 observation.

51 437         Second, HIV prevalence among older transgender women ( $\geq 25$  years) was significantly  
52  
53 438 higher, compared to that among their younger counterparts. This finding is similar to those of  
54  
55 439 previous studies in Cambodia<sup>22</sup> and Thailand.<sup>3</sup> A possible explanation is that older transgender  
56  
57  
58  
59  
60

1  
2  
3 440 women had been exposed to risks for a longer period of time; the number of their sexual part-  
4  
5 441 ners accumulated over time and thus increased cumulative probability of HIV acquisition.<sup>22</sup>  
6

7 442 Third, our study suggests that more overt feminine expression (e.g., those who dressed  
8  
9 443 as a woman all the time) was associated with a higher HIV prevalence. A study in the United  
10  
11 444 States found that transgender women who disclosed their female gender identity possessed a  
12  
13 445 higher HIV prevalence.<sup>33</sup> In our study, these transgender women who dressed as a woman all  
14  
15 446 the time had higher numbers of both male non-commercial (mean= 8.1 vs. 5.1;  $p= 0.004$ ) and  
16  
17 447 male commercial sexual partners (mean= 3.7 vs. 1.6;  $p< 0.001$ ), compared to those who did not.  
18  
19 448 Making their female status visible could render more chances to meet with men. However, it  
20  
21 449 could make them difficult to find a decent job due to stigmatization and discrimination, thus  
22  
23 450 leading them to engage in sex work. This finding is in line with existing literature showing that  
24  
25 451 transgender women try to have sex with men –both casual and paid sex– to prove or validate  
26  
27 452 their female gender identity.<sup>34–36</sup> In these contexts, “sex work provides both desired gender af-  
28  
29 453 firmation and economic stability, often with greater financial rewards for sex without a con-  
30  
31 454 dom.”<sup>34</sup> The desire to affirm their gender identity and attractiveness to men also incentivizes  
32  
33 455 them to engage in casual sex with multiple partners.<sup>15</sup> This sexual behavior may make them  
34  
35 456 more prone to HIV infection.

36 457 There is a tendency to self-inject gender-affirming hormones, often with shared needles,  
37  
38 458 among transgender women in Cambodia.<sup>37</sup> This risky practice was associated with an increased  
39  
40 459 risk of HIV infection, implying that self-injecting was performed through unsafe means, and that  
41  
42 460 injecting by a trained health or other professional might mitigate the likelihood of HIV infection.  
43  
44 461 Although hormone injection to augment femininity is becoming more common, it can potential-  
45  
46 462 ly cause adverse health effects among transgender women.<sup>3 38</sup> A Thai study also found that  
47  
48 463 transgender women who injected hormone to make them more feminine had a higher HIV  
49  
50 464 prevalence.<sup>3</sup>

51 465 Fourth, transgender women who completed or dropped out primary school had a higher  
52  
53 466 HIV prevalence than those with high-school education. This finding confirms results of the  
54  
55 467 TGIBBS 2012 in Cambodia<sup>22</sup> and other studies<sup>6 39</sup> that associated low education with high HIV  
56  
57 468 prevalence among transgender women. This has important implications for HIV programs to  
58  
59  
60

1  
2  
3 469 ensure that poorly educated transgender women are reached with education, information,  
4  
5 470 communication and skills related to HIV prevention and other health-related services.  
6

7 471 Fifth, transgender women with self-reported STI symptoms (having ulcerations or sores  
8  
9 472 in the genital area in the past 12 months) had a greater HIV prevalence. This is in line with exist-  
10  
11 473 ing evidence showing that STIs promote HIV transmission via a variety of biological mecha-  
12  
13 474 nisms.<sup>40</sup> Transgender women with high rates of STIs, particularly ulcerative genital diseases, are  
14  
15 475 at high risk of HIV acquisition.<sup>23</sup>

16 476 Finally, transgender women who reported never using online services developed for  
17  
18 477 transgender women or MSM had an increased risk of HIV infection. Low utilization of online  
19  
20 478 services by key populations in Cambodia is iterated in other studies.<sup>41</sup> Non-users of online ser-  
21  
22 479 vices, which tend to provide HIV information, education and communication, might have riskier  
23  
24 480 sexual behaviors. Our data suggest that transgender women who did not use online services  
25  
26 481 had higher numbers of overall male sexual partners (10.2 vs. 6.3,  $p= 0.002$ ) and male commer-  
27  
28 482 cial sexual partners (0.8 vs. 0.6,  $p= 0.001$ ) in the past three months. Also, they had a higher rate  
29  
30 483 of inconsistent condom use with male commercial sexual partners in the past three months  
31  
32 484 (48.5% vs. 34.4%,  $p= 0.004$ ). Unfortunately, in this study, we did not collect the details about  
33  
34 485 the type of the online services, which could refer to dating, health and social services, or anothe-  
35  
36 486 r type of online service. Studies in other settings confirm that transgender women with multi-  
37  
38 487 ple sexual partners are exposed to a riskier level of HIV infection.<sup>6 15</sup> This finding suggests that  
39  
40 488 access to community-based services tailored to transgender population can reduce their vul-  
41  
42 489 nerability to HIV as demonstrated in other settings.<sup>42</sup> Sustaining and increasing the coverage of  
43  
44 490 internet and peer-led community-based services for this population is particularly important,  
45  
46 491 given that they are often unable to access health services due to stigmatization and discrimina-  
47  
48 492 tion,<sup>16 41</sup> even in health care settings.<sup>18</sup> As in other settings globally,<sup>9</sup> only half of those who  
49  
50 493 were infected with HIV were aware of their status, demonstrating the need to intensify HIV  
51  
52 494 testing, including self-testing at the community level, which transgender women in Cambodia  
53  
54 495 are willing to use.<sup>43</sup> Our study also found that once diagnosed, the coverage of ART was high in  
55  
56 496 this population.  
57  
58  
59  
60



## 498 **LIMITATIONS OF THE STUDY**

499 Our study covered only the capital city and 12 provinces, which contain the highest numbers of  
500 transgender women. Since cities and provinces with fewer TG were left out, these results may  
501 not be generalized to all transgender women nationally. Second, the initial participant seeds  
502 were identified and recruited by outreach workers of community-based organizations, which  
503 could introduce bias towards transgender women under their programs, leading to a recruit-  
504 ment bias. This problem could be exacerbated by outreach workers interviewing some partici-  
505 pants who had received services from their NGO, which could have induced the participants'  
506 responses. Third, this study employed a self-reporting questionnaire on sensitive health and  
507 sexual behaviors, which may have been limited by social desirability bias. Fourth, albeit mini-  
508 mal, the monetary incentive given to the participants to recruit seeds may have affected their  
509 genuine motivation to partake in the study, which could influence their responses. Fifth, we  
510 used the backward selection of variables in the multivariable analysis. By using this method, we  
511 possibly dropped one or more variables that could be significant if we kept them until the final  
512 model. Finally, as this study was cross-sectional, it reports associations at a given time, and may  
513 not be construed to be reporting causal relationships.

514

## 515 **CONCLUSIONS**

516 This study demonstrates that HIV prevalence among transgender women in Cambodia remains  
517 persistently high. With the prevalence rate at 5.9%, higher prevalence was observed among  
518 transgender women who resided in urban areas, of older age, with low education levels, with  
519 previous genital sores, with a history of self-injected hormone and those who had never used  
520 online services developed for transgender women or MSM. Therefore, to eliminate new HIV  
521 infections among transgender women, tailored interventions need to focus on these sub-  
522 populations and attendant risk factors.

523

524 **Acknowledgments** This study was conducted in collaboration between the consortium partners  
525 of the HIV/AIDS Flagship Project including KHANA, FHI360, PSI/PSK and the 13 Municipal and  
526 Provincial Health Departments under the leadership of National Center for HIV/AIDS, Derma-

1  
2  
3 527 tology and STD (NCHADS). We thank all implementing partners and participants in the study  
4  
5 528 who fully supported during the study design and data collection. Disclaimer: Content of this pa-  
6  
7 529 per is the responsibility of the authors and does not reflect the view of USAID or our respective  
8  
9 530 institutions.

10 531  
11  
12 532 **Contributors** SC, ST, PM, CL and SY designed the study, developed the research protocol and  
13  
14 533 tools. SC, CN and SY analyzed the data, interpreted the results and wrote the manuscript. PC,  
15  
16 534 SC, CL, KP, ST and PM were responsible for training and data collection. JM, JD and GM sup-  
17  
18 535 ported findings analyses and manuscript writing. All authors read and approved the final manu-  
19  
20 536 script.

21 537  
22  
23  
24 538 **Funding**  
25  
26 539 This study was conducted as part of the HIV/AIDS Flagship Project funded by President's Emer-  
27  
28 540 gency Plan For AIDS Relief (PEPFAR) through the United States Agency for International Devel-  
29  
30 541 opment (USAID).

31 542  
32  
33 543 **Competing interests** None declared.

34 544  
35  
36 545 **Patient consent** Obtained

37 546  
38  
39  
40 547 **Ethics approval** The National Ethics Committee for Health Research (NE-CHR) of the Ministry of  
41  
42 548 Health, Cambodia (No. 420 NECHR) and FHI 360's Protection of Human Subjects Committee  
43  
44 549 (PHSC No. 713897).

45 550  
46  
47  
48 551 **Consent for publication**  
49  
50 552 Consent to publish was obtained from participants as stated in the informed consent form.

51 553  
52  
53  
54 554 **Data sharing statement** Data used for this study cannot be made available in the manuscript,  
55  
56 555 the supplemental files or a public repository due to the ethical restriction stated in the agree-

1  
2  
3 556 ment with the ethical committees. However, they can be accessed upon request from the Prin-  
4  
5 557 cipal Investigator (Dr. Siyan Yi) at [siyan@doctor.com](mailto:siyan@doctor.com).  
6  
7 558

8  
9 559 **REFERENCES**

- 10 560 1. Baral SD, Poteat T, Stromdahl S, *et al.* Worldwide burden of HIV in transgender women:  
11 561 a systematic review and meta-analysis. *Lancet Infect Dis* 2013;13(3):214-22.  
12  
13 562 2. Silva-Santisteban A, Raymond HF, Salazar X, *et al.* Understanding the HIV/AIDS epidemic  
14 563 in transgender women of Lima, Peru: results from a sero-epidemiologic study using  
15 564 respondent driven sampling. *AIDS Behav* 2012;16(4):872-81.  
16  
17 565 3. Guadamuz TE, Wimonstete W, Varangrat A, *et al.* HIV prevalence, risk behavior, hormone  
18 566 use and surgical history among transgender persons in Thailand. *AIDS Behav*  
19 567 2011;15(3):650-8.  
20  
21 568 4. Brennan J, Kuhns LM, Johnson AK, *et al.* Syndemic theory and HIV-related risk among  
22 569 young transgender women: the role of multiple, co-occurring health problems and social  
23 570 marginalization. *Am J Public Health* 2012;102(9):1751-7.  
24  
25 571 5. Nemoto T, Operario D, Keatley J, *et al.* HIV risk behaviors among male-to-female  
26 572 transgender persons of color in San Francisco. *Am J Public Health* 2004;94(7):1193-9.  
27  
28 573 6. Clements-Nolle K, Marx R, Guzman R, *et al.* HIV prevalence, risk behaviors, health care  
29 574 use, and mental health status of transgender persons: implications for public health  
30 575 intervention. *Am J Public Health* 2001;91(6):915-21.  
31  
32 576 7. Gay and Lesbian Medical Association. *Healthy People 2010 Companion Document for*  
33 577 *Lesbian, Gay, Bisexual, and Transgender (LGBT) Health*. San Francisco, CA, United States:  
34 578 Gay and Lesbian Medical Association, 2001.  
35  
36 579 8. Poteat T, Reisner SL, Radix A. HIV epidemics among transgender women. *Curr Opin HIV*  
37 580 *AIDS* 2014;9(2):168-73.  
38  
39 581 9. United Nations Programme on HIV/AIDS (UNAIDS). *Fast Track: Ending the AIDS epidemic*  
40 582 *by 2030*. Geneva, Switzerland: UNAIDS, 2014  
41  
42 583 10. Wiessing LG, van Roosmalen MS, Koedijk P, *et al.* Silicones, hormones and HIV in  
43 584 transgender street prostitutes. *AIDS* 1999;13(16):2315-6.  
44  
45  
46  
47  
48  
49  
50  
51  
52  
53  
54  
55  
56  
57  
58  
59  
60

- 1  
2  
3 585 11. Global Forum on MSM and HIV. *MSM and HIV/AIDS Risk in Asia : What Is Fueling the*  
4  
5 586 *Epidemic Among MSM and How Can It Be Stopped?* Oakland, CA, United States: Global  
6  
7 587 Forum on MSM and HIV, 2006.  
8  
9 588 12. De Santis JP. HIV infection risk factors among male-to-female transgender persons: a  
10  
11 589 review of the literature. *J Assoc Nurses AIDS Care* 2009;20(5):362-72.  
12  
13 590 13. Operario D, Nemoto T, Iwamoto M, *et al.* Unprotected sexual behavior and HIV risk in  
14  
15 591 the context of primary partnerships for transgender women. *AIDS Behav*  
16  
17 592 2011;15(3):674-82.  
18  
19 593 14. Bockting WO, Robinson BE, Forberg J, *et al.* Evaluation of a sexual health approach to  
20  
21 594 reducing HIV/STD risk in the transgender community. *AIDS care* 2005;17(3):289-303.  
22  
23 595 15. Bockting WO, Robinson BE, Rosser BR. Transgender HIV prevention: a qualitative needs  
24  
25 596 assessment. *AIDS care* 1998;10(4):505-25.  
26  
27 597 16. Chakrapani V, Newman PA, Shunmugam M, *et al.* Syndemics of depression, alcohol use,  
28  
29 598 and victimisation, and their association with HIV-related sexual risk among men who  
30  
31 599 have sex with men and transgender women in India. *Glob Public Health* 2015:1-16.  
32  
33 600 17. Nemoto T, Iwamoto M, Perngparn U, *et al.* HIV-related risk behaviors among kathoey  
34  
35 601 (male-to-female transgender) sex workers in Bangkok, Thailand. *AIDS care*  
36  
37 602 2012;24(2):210-9.  
38  
39 603 18. Scheim AI, Santos GM, Arreola S, *et al.* Inequities in access to HIV prevention services for  
40  
41 604 transgender men: results of a global survey of men who have sex with men. *J Int AIDS*  
42  
43 605 *Soc* 2016;19(3 Suppl 2):20779.  
44  
45 606 19. Schneiders ML, Weissman A. Determining barriers to creating an enabling environment  
46  
47 607 in Cambodia: results from a baseline study with key populations and police. *J Int AIDS*  
48  
49 608 *Soc* 2016;19(4 Suppl 3):20878.  
50  
51 609 20. Brennan J, Kuhns LM, Johnson AK, *et al.* Syndemic theory and HIV-related risk among  
52  
53 610 young transgender women: the role of multiple, co-occurring health problems and social  
54  
55 611 marginalization. *Am J Public Health* 2012;102(9):1751-7.  
56  
57  
58  
59  
60

- 1  
2  
3 612 21. Raiford JL, Hall GJ, Taylor RD, *et al.* The Role of Structural Barriers in Risky Sexual  
4  
5 613 Behavior, Victimization and Readiness to Change HIV/STI-Related Risk Behavior Among  
6  
7 614 Transgender Women. *AIDS behav* 2016;20(10):2212-21.  
8  
9 615 22. Weissman A, Ngak S, Srean C, *et al.* HIV Prevalence and Risks Associated with HIV  
10 616 Infection among Transgender Individuals in Cambodia. *PLoS One* 2016;11(4):e0152906.  
11  
12 617 23. Chhorvann C, Vonthanak S. *Estimations and Projections of HIV/AIDS in Cambodia 2010-*  
13 618 *2015.* Phnom Penh, Cambodia: National Center for HIV/AIDS, Dermatology and STDs  
14  
15 619 (NCHADS), 2011.  
16  
17 620 24. Liu K, Chhea C. *The BROS Khmer: Behavioral risks on-site serosurvey among at-risk urban*  
18 621 *men in Cambodia.* Phnom Penh, Cambodia: FHI 360, 2010.  
19  
20 622 25. National Center for HIV/AIDS, Dermatology and STD (NCHADS). *Standard Operation*  
21 623 *Procedure (SoP) for Boosted Continuum of Prevention to Care and Treatment for Most at*  
22 624 *Risk Population in Cambodia.* Phnom Penh, Cambodia: NCHADS, 2013.  
23  
24 625 26. Mun P, Chhim S, Chhoun P, *et al.* *National Popualtion Size Estimation, HIV related Risk*  
25 626 *Behaoviors, and HIV Prevrence among Men who Sex with Men in Cambodia in 2014.*  
26 627 Phnom Penh, Cambodia: NCHADS/KHANA, 2016.  
27  
28 628 27. FHI360. *Size estimation of Transgender Population in Cambodia, 2012.* Phnom Penh,  
29 629 Cambodia: FHI 360, 2012.  
30  
31 630 28. National Center for HIV/AIDS, Detamatology and STD (NCHADS). *Standard Operating*  
32 631 *Procedures for HIV Testing and Counseling (HTC).* Phnom Penh, Cambodia: NCHADS,  
33 632 2012.  
34  
35 633 29. FHI360. *Behavioral Surveilance Surveys (BSS). Guideline for Repeated behavioral Surveys*  
36 634 *in Population at Risk of HIV.* Washington DC, United States: FHI360, 2000.  
37  
38 635 30. Mun P, Sopheab H, Tuot S, *et al.* *National HIV sentinel survey among women attending*  
39 636 *antenatal care in Cambodia 2014.* Phnom Penh, Cambodia: NCHADS, 2016.  
40  
41 637 31. National Center for HIV/AIDS, Dermatology and STDs (NCHADS). *Cambodia Sub-National*  
42 638 *HIV Estimates and Projection.* Phnom Penh, Cambodia: NCHADS; 2016.  
43  
44 639 32. Yi S, Chhim S, Chhoun P, *et al.* *Men who have sex with men in Cambodia: Population*  
45 640 *size, HIV risky behaviors, and HIV prevalence.* *Am J Epidemiol Infect Dis* 2016;4(5):91-9  
46  
47  
48  
49  
50  
51  
52  
53  
54  
55  
56  
57  
58  
59  
60

- 1  
2  
3 641 33. Nuttbrock L, Hwahng S, Bockting W, *et al.* Lifetime risk factors for HIV/sexually  
4  
5 642 transmitted infections among male-to-female transgender persons. *J Acquir Immune*  
6  
7 643 *Defic Syndr* 2009;52(3):417-21.  
8  
9 644 34. Melendez RM, Pinto R. 'It's really a hard life': Love, gender and HIV risk among male-to-  
10  
11 645 female transgender persons. *Cult Health Sex* 2007;9(3):233-45.  
12  
13 646 35. Sevelius JM. Gender Affirmation: A Framework for Conceptualizing Risk Behavior Among  
14  
15 647 Transgender Women of Color. *Sex Roles* 2013;68(11):675-89.  
16  
17 648 36. Sausa LA, Keatley J, Operario D. Perceived risks and benefits of sex work among  
18  
19 649 transgender women of color in San Francisco. *Arch Sex Behav* 2007;36(6):768-77.  
20  
21 650 37. Yi S, Ngin C, Tuot S, *et al.* HIV prevalence, risky behaviors, and discrimination  
22  
23 651 experiences among transgender women in Cambodia: Descriptive findings from a  
24  
25 652 national integrated biological and behavioral survey. *BMC Int Health Hum Rights* 2016.  
26  
27 653 (In press).  
28  
29 654 38. Sanchez NF, Sanchez JP, Danoff A. Health Care Utilization, Barriers to Care, and  
30  
31 655 Hormone Usage Among Male-to-Female Transgender Persons in New York City. *Am J*  
32  
33 656 *Public Health* 2009;99(4):713-9.  
34  
35 657 39. Simon PA, Reback CJ, Bemis CC. HIV prevalence and incidence among male-to-female  
36  
37 658 transsexuals receiving HIV prevention services in Los Angeles County. *AIDS*  
38  
39 659 2000;14(18):2953-5.  
40  
41 660 40. Fleming DT, Wasserheit JN. From epidemiological synergy to public health policy and  
42  
43 661 practice: the contribution of other sexually transmitted diseases to sexual transmission  
44  
45 662 of HIV infection. *Sex Transm Infect* 1999;75(1):3-17.  
46  
47 663 41. HIV Innovate and Evaluate Project, University Research Co., LLC (URC-HIEP). *Evaluation*  
48  
49 664 *of the HIV Program for Transgender Women in Cambodia*. Phnom Penh, Cambodia: URC-  
50  
51 665 HIEP, 2016.  
52  
53 666 42. Shaikh S, Mburu G, Arumugam V, *et al.* Empowering communities and strengthening  
54  
55 667 systems to improve transgender health: outcomes from the Pehchan programme in  
56  
57 668 India. *J Int AIDS Soc* 2016;19(3 Suppl 2):20809.  
58  
59  
60

- 1  
2  
3 669 43. Pal K, Ngin C, Tuot S, *et al.* Acceptability Study on HIV Self-Testing among Transgender  
4  
5 670 Women, Men who Have Sex with Men, and Female Entertainment Workers in  
6  
7 671 Cambodia: A Qualitative Analysis. PloS One 2016;11(11):e0166129.  
8  
9 672  
10  
11  
12  
13  
14  
15  
16  
17  
18  
19  
20  
21  
22  
23  
24  
25  
26  
27  
28  
29  
30  
31  
32  
33  
34  
35  
36  
37  
38  
39  
40  
41  
42  
43  
44  
45  
46  
47  
48  
49  
50  
51  
52  
53  
54  
55  
56  
57  
58  
59  
60

Participant ID Code: .....

**Integrated Biological and Behavioral Survey of Transgender Women in Cambodia, 2016**

Date of interview: day.....month.....year.....

Province/City:

- |                     |                     |                  |
|---------------------|---------------------|------------------|
| 1. Phnom Pehn       | 6. Preah Sihanouk   | 11. Kandal       |
| 2. Kampong Cham     | 7. Prey Veng        | 12. Koh Kong     |
| 3. Battambang       | 8. Svay Rieng       | 13. Thbong Khmum |
| 4. Siem Reap        | 9. Kampong Spue     |                  |
| 5. Banteay Meanchey | 10. Kampong Chhnang |                  |

Interview Location (City/NGOs): .....

Name of administrative districts (current residence): .....

Status of administrative districts:

- 1- Urban
- 2- Rural

| SECTION 1: SOCIODEMOGRAPHIC CHARACTERISTICS                                             |                                                             |                                                                                                                                                                                                                                                                               |         |
|-----------------------------------------------------------------------------------------|-------------------------------------------------------------|-------------------------------------------------------------------------------------------------------------------------------------------------------------------------------------------------------------------------------------------------------------------------------|---------|
| No.                                                                                     | Questions and filters                                       | Coding categories                                                                                                                                                                                                                                                             | Skip to |
| <b>Now I would like to ask you some questions related to your personal information.</b> |                                                             |                                                                                                                                                                                                                                                                               |         |
| Q001                                                                                    | How old are you?                                            | Age in completed years:<br>.....                                                                                                                                                                                                                                              |         |
| Q002                                                                                    | What is your current marital status?<br>(only one response) | Married and living together 1<br>Married ,but not living together 2<br>Widowed, Divorced or separated 3<br>Not married, not living with any partner 4<br>Not married, living with sweetheart (female) 5<br>Not married but living with male lover 6<br>Other (Specify.....) 7 |         |
| Q003                                                                                    | For how long have you been living in the current city?      | .....Years<br><u>Record 0</u> if not living in this city<br><u>Record 1</u> if living in this city 1 year or less<br>Refuse to answer 99                                                                                                                                      |         |
| Q004                                                                                    | In the past 6 months, on average, how much money            | Amount of money (in US\$): .....<br>Refuse to answer 99                                                                                                                                                                                                                       |         |



|      |                                                                                                                                                                                     |                                                                                                                                                                                                                                                                                                              |  |
|------|-------------------------------------------------------------------------------------------------------------------------------------------------------------------------------------|--------------------------------------------------------------------------------------------------------------------------------------------------------------------------------------------------------------------------------------------------------------------------------------------------------------|--|
|      | did you make per month?<br>(exchange rate: 4000 riel per 1 US\$)                                                                                                                    |                                                                                                                                                                                                                                                                                                              |  |
| Q005 | How many years of formal education have you completed?                                                                                                                              | Number of years: .....<br><u>Record 0</u> if never attending school.<br>Refuse to answer 99                                                                                                                                                                                                                  |  |
| Q006 | What is your current job (main source of income)?<br><br>(only one response)<br><br><i>Note: If you are both studying and having a paid job, report your main source of income.</i> | Unemployed 0<br>Hair dresser/Beautician 1<br>Government officer 2<br>Laborer (factory, construction work) 3<br>Seller 4<br>Entertainment Worker (bar, karaoke, etc.) 5<br>Sex worker 6<br>Student 7<br>NGO staff 8<br>Private company staff 9<br>Farmer/fisherman 10<br>Artist 11<br>Other (Specify.....) 12 |  |

| SECTION 2. TRANSGENDER IDENTITY & EXPERIENCES |                                                                                                              |                                                                                            |            |
|-----------------------------------------------|--------------------------------------------------------------------------------------------------------------|--------------------------------------------------------------------------------------------|------------|
| Q007                                          | What gender do you consider yourself?                                                                        | Female 1<br>Male 2<br>Third gender 3<br>Uncertain 4<br>Refuse to answer 99                 |            |
| Q008                                          | How often do you express or dress yourself as a woman?                                                       | All the time 1<br>Often 2<br>Sometimes 3<br>Rarely 4<br>Refuse to answer 99                |            |
| Q009                                          | How many friends in your social network are also transgender?                                                | Number: .....                                                                              |            |
| Q010                                          | Have you ever taken hormones or any substances for beauty purposes?                                          | No 1<br>Yes 2<br>Refuse to answer 99                                                       | 2→<br>Q014 |
| Q011                                          | What are the methods you have used to take hormones or any substances for beauty purposes? [multiple answer] | Pills 1<br>Injections 2<br>Skin patches 3<br>Other (Specify.....) 4<br>Refuse to answer 99 |            |
| Q012                                          | If you have taken hormones or any substances for beauty                                                      | Never injected 0<br>Injected by myself 1                                                   |            |

|      |                                                                                              |                                                                                                                  |  |
|------|----------------------------------------------------------------------------------------------|------------------------------------------------------------------------------------------------------------------|--|
|      | purposes by injection, how have you received it?                                             | Injected by skilled personnel (beauty clinic) 2<br>Injected by non-skilled personnel 3<br>Other (Specify.....) 4 |  |
| Q013 | If you have injected hormones or any substances for beauty purposes, have you shared needle? | Never injected 0<br>No 1<br>Yes 2<br>Refuse to answer 99                                                         |  |
| Q014 | Have you ever had any operation to change any parts of your body to become a woman?          | No 1<br>Yes 2<br>Refuse to answer 99                                                                             |  |

| <b>Section 3. SEXUAL PARTNERS AND SEXUAL HISTORY</b> |                                                                                                                          |                                                                                   |                    |
|------------------------------------------------------|--------------------------------------------------------------------------------------------------------------------------|-----------------------------------------------------------------------------------|--------------------|
| <b>No.</b>                                           | <b>Questions and filters</b>                                                                                             | <b>Coding categories</b>                                                          | <b>Skip to</b>     |
|                                                      | <b>Now I would like to ask questions about your recent sexual relationship with various kinds of sexual partners.</b>    |                                                                                   |                    |
| Q015                                                 | Have you ever had sex with any partner in your life time? [Including vaginal, or anal sex]                               | No 0<br>Yes 1<br>Refuse to answer 99                                              |                    |
| Q016                                                 | How likely do you think you are infected with HIV?                                                                       | Very Likely 1<br>Likely 2<br>Unlikely 3<br>Very Unlikely 4<br>Refuse to answer 99 |                    |
| <b>Sex with women</b>                                |                                                                                                                          |                                                                                   |                    |
| Q017                                                 | Have you ever had sex with a woman? [Including vaginal or anal sex]                                                      | No 0<br>Yes 1<br>Refuse to answer 99                                              | 0, 99<br>→<br>Q028 |
| Q018                                                 | In the past 12 months, have you had sex with a woman? [Including vaginal or anal sex]                                    | No 0<br>Yes 1<br>Refuse to answer 99                                              | 0, 99<br>→<br>Q028 |
| Q019                                                 | In the past 12 months, have you had sex with a woman not in exchange for money or gifts? [Including vaginal or anal sex] | No 0<br>Yes 1<br>Refuse to answer 99                                              | 0→<br>Q022         |
| Q020                                                 | In the past 3 month, how many women did you have                                                                         | Number of women:<br>.....                                                         |                    |

Questionnaire; Integrated Biological and Behavioral Survey among Transgender Population in Cambodia, 2015, Version 2.0, 17 September 2015 Page 3 of 11

|      |                                                                                                                                                                      |                                                                                                                                                                                                                                                                                          |               |
|------|----------------------------------------------------------------------------------------------------------------------------------------------------------------------|------------------------------------------------------------------------------------------------------------------------------------------------------------------------------------------------------------------------------------------------------------------------------------------|---------------|
|      | sex with not in exchange for money or gifts?                                                                                                                         | Refuse to answer 99                                                                                                                                                                                                                                                                      |               |
| Q021 | In the past 3 month, how often did you use a condom when you had vaginal or anal sex with women not in exchange for money or gifts?                                  | Never had sex with a woman 0<br>Always 1<br>Often 2<br>Sometimes 3<br>Never 4<br>Refuse to answer 99                                                                                                                                                                                     | 0, 1→<br>Q024 |
| Q022 | In the past 3 month, if you did not always use a condom when you had sex with women not in exchange for money or gifts? What were the reasons?<br>[Multiple Answers] | We are in a relationship 1<br>She is not HIV/STI infected 2<br>Too high to use a condom 3<br>No condom available 4<br>Feel better without a condom 5<br>I am HIV-infected 6<br>I penetrated, so I am not at risk 7<br>Partner refused 8<br>Other (Specify.....) 9<br>Refuse to answer 99 |               |
| Q023 | In the past 12 months, have you had sex with a woman in exchange for money or gifts? [Including vaginal or anal sex]                                                 | No 0<br>Yes 1<br>Refuse to answer 99                                                                                                                                                                                                                                                     | 0→<br>Q028    |
| Q024 | In the past 3 months, how many women did you have sex with in exchange for money or gifts? [Including vaginal or anal sex]                                           | Number of women:<br>.....<br>Refuse to answer 99                                                                                                                                                                                                                                         |               |
| Q025 | Where did you meet women with whom you had sex with in exchange for money or gifts??                                                                                 | Park 1<br>Street 2<br>Bar/discotheque/cafe 3<br>Beer Garden/Restaurant 4<br>Massage Parlor 5<br>Karaoke 6<br>Online (Facebook, Line, Website) 7<br>Guesthouse/hotel 8<br>Workplace/school 9<br>Other (Specify.....) 10                                                                   |               |
| Q026 | In the past 12 months, how often did you use a condom when you had vaginal or anal sex with women in exchange for money or gifts?                                    | Never had sex 0<br>Always 1<br>Often 2<br>Sometimes 3<br>Never 4<br>Refuse to answer 99                                                                                                                                                                                                  |               |

|      |                                                                                                                                                                              |                                                                                                                                                                                                                                                                                          |  |
|------|------------------------------------------------------------------------------------------------------------------------------------------------------------------------------|------------------------------------------------------------------------------------------------------------------------------------------------------------------------------------------------------------------------------------------------------------------------------------------|--|
| Q027 | In the past 3 months, if you did not always use a condom when you had sex with women not in exchange for money or gifts?<br>What were the reasons?<br><br>[Multiple Answers] | We are in a relationship 1<br>She is not HIV/STI infected 2<br>Too high to use a condom 3<br>No condom available 4<br>Feel better without a condom 5<br>I am HIV-infected 6<br>I penetrated, so I am not at risk 7<br>Partner refused 8<br>Other (Specify.....) 9<br>Refuse to answer 99 |  |
|------|------------------------------------------------------------------------------------------------------------------------------------------------------------------------------|------------------------------------------------------------------------------------------------------------------------------------------------------------------------------------------------------------------------------------------------------------------------------------------|--|

| Sex with men |                                                                                                                          |                                                                                                                                                                                                                                                                                                       |                   |
|--------------|--------------------------------------------------------------------------------------------------------------------------|-------------------------------------------------------------------------------------------------------------------------------------------------------------------------------------------------------------------------------------------------------------------------------------------------------|-------------------|
| Q028         | Have you ever had anal sex with a man?                                                                                   | No 0<br>Yes 1<br>Refuse to answer 99                                                                                                                                                                                                                                                                  | 0,<br>99→<br>Q042 |
| Q029         | In the past 12 months, have you had anal sex with a man?                                                                 | No 0<br>Yes 1<br>Refuse to answer 99                                                                                                                                                                                                                                                                  | 0,<br>99→<br>Q042 |
| Q030         | In the past 12 months, what was your usual role in anal sex with a man?                                                  | Insertive 1<br>Receptive 2<br>Both 3<br>Refuse to answer 99                                                                                                                                                                                                                                           |                   |
| Q031         | In the past 3 months, have you had sex with men not in exchange for money or gifts?                                      | No 0<br>Yes 1<br>Refuse to answer 99                                                                                                                                                                                                                                                                  | 0→<br>Q033        |
| Q032         | In the past 3 months, how many men you had sex with not in exchange for money or gifts?                                  | Number of men: .....<br>Refuse to answer 99                                                                                                                                                                                                                                                           |                   |
| Q033         | In the past 12 months, how often did you use a condom when you had anal sex with men not in exchange for money or gifts? | Never had sex 0<br>Always 1<br>Often 2<br>Sometimes 3<br>Never 4<br>Refuse to answer 99                                                                                                                                                                                                               | 0, 1→<br>Q035     |
| Q034         | If not always, why not?<br><br>[Multiple Answers]                                                                        | We are in a relationship 1<br>He is not HIV/STI infected 2<br>I was too drunk or too high with drugs 3<br>No condom available 4<br>Feel better without a condom 5<br>I am HIV-infected 6<br>I penetrated, so I am not at risk 7<br>Partner refused 8<br>Other (Specify.....) 9<br>Refuse to answer 99 |                   |

|      |                                                                                                        |                                                                                                                                                                                                                                                                                                    |               |
|------|--------------------------------------------------------------------------------------------------------|----------------------------------------------------------------------------------------------------------------------------------------------------------------------------------------------------------------------------------------------------------------------------------------------------|---------------|
| Q035 | In the past 12 months, have you had sex with men in exchange for money or gifts?                       | No 0<br>Yes 1<br>Refuse to answer 99                                                                                                                                                                                                                                                               | 0→<br>Q040    |
| Q036 | In the past 3 month, how many men you had sex with in exchange for money or gifts?                     | Number of men:<br>.....<br>Refuse to answer 99                                                                                                                                                                                                                                                     |               |
| Q037 | Where did you meet the men you had sex with in exchange for money or gifts?                            | Park 1<br>Street 2<br>Bar/discotheque/cafe 3<br>Beer Garden/Restaurant 4<br>Massage Parlor 5<br>Karaoke 6<br>Online (Facebook, Line, Website) 7<br>Guesthouse/hotel 8<br>Workplace/School 9<br>Other (Specify.....) 10                                                                             |               |
| Q038 | In the past 12 months, how often did you use a condom when you had anal sex with men you paid for sex? | Never had anal sex 0<br>Always 1<br>Often 2<br>Sometimes 3<br>Never 4<br>Refuse to answer 99                                                                                                                                                                                                       | 0, 1→<br>Q615 |
| Q039 | If not always, why not?<br><br>[Multiple Answers]                                                      | We are in a relationship 1<br>He is not HIV/STI infected 2<br>I was drunk or too high with drugs 3<br>No condom available 4<br>Feel better without a condom 5<br>I am HIV-infected 6<br>I penetrated, so I am not at risk 7<br>Partner refused 8<br>Other (Specify.....) 10<br>Refuse to answer 99 |               |

| Access to condoms and lubricant |                                                                              |                                                                                                                                                                                                        |         |
|---------------------------------|------------------------------------------------------------------------------|--------------------------------------------------------------------------------------------------------------------------------------------------------------------------------------------------------|---------|
| No.                             | Questions and filters                                                        | Coding categories                                                                                                                                                                                      | Skip to |
| Q040                            | In this last 12 months, where did you get condoms?<br><br>[Multiple Answers] | Friends/outreach workers 1<br>Condom peer sale representative 2<br>Pharmacy/drug store/clinic 3<br>Condom outlets 4<br>Mart/mini-mart 5<br>Groceries 6<br>Hotel/guesthouse 7<br>Other (Specify.....) 8 |         |

|      |                                                                                |                                                                                                                                                                                                                               |  |
|------|--------------------------------------------------------------------------------|-------------------------------------------------------------------------------------------------------------------------------------------------------------------------------------------------------------------------------|--|
|      |                                                                                | Refuse to answer 99                                                                                                                                                                                                           |  |
| Q041 | In this last 12 months, where did you get lubricant?<br><br>[Multiple Answers] | Friends/outreach workers 1<br>Condom peer sale representative 2<br>Pharmacy/drug store/clinic 3<br>Condom outlets 4<br>Mart/mini-mart 5<br>Groceries 6<br>Hotel/guesthouse 7<br>Other (Specify.....) 8<br>Refuse to answer 99 |  |

| SECTION 4. STI AND HIV TESTING |                                                                                                                          |                                                                                                                                                                                                                            |            |
|--------------------------------|--------------------------------------------------------------------------------------------------------------------------|----------------------------------------------------------------------------------------------------------------------------------------------------------------------------------------------------------------------------|------------|
| No.                            | Questions and filters                                                                                                    | Coding categories                                                                                                                                                                                                          | Skip to    |
| Q042                           | In the past 12 months, have you experienced the following symptoms?<br><br>[Multiple Answers]                            | Cuts or sores in the genital area 1<br>Swelling in the genital area 2<br>Abnormal urethral discharge 3<br>Symptoms on the anus 4<br>Symptom in the mouth/throat 5<br>Refuse to answer 99                                   |            |
| Q043                           | Where did you first go for treatment the last time you had any above-mentioned symptoms?<br><br>(Only one response)      | Never had any symptoms 0<br>Pharmacy 1<br>Private clinic/hospital 2<br>Public Hospital/STD clinic 3<br>NGO Clinic/hospital 4<br>Traditional doctor 5<br>Didn't get care 6<br>Other (Specify.....) 7<br>Refuse to answer 99 |            |
| Q044                           | Have you ever been tested for HIV?                                                                                       | No 0<br>Yes 1<br>Refuse to answer 99                                                                                                                                                                                       | 0→<br>Q049 |
| Q045                           | In past 6 months, have you been tested for HIV?                                                                          | No 0<br>Yes 1<br>Refuse to answer 99                                                                                                                                                                                       |            |
| Q046                           | How long has it been since you received the last HIV test?                                                               | Number of months.....                                                                                                                                                                                                      |            |
| Q047                           | If a rapid self-test kit for HIV was available and you could get the result within 20 minutes at home, would you use it? | No 0<br>Yes 1<br>Refuse to answer 99                                                                                                                                                                                       |            |

|                                                    |      |                                                                               |                                                                                                                                                                                                                 |                |
|----------------------------------------------------|------|-------------------------------------------------------------------------------|-----------------------------------------------------------------------------------------------------------------------------------------------------------------------------------------------------------------|----------------|
| 1<br>2<br>3<br>4<br>5<br>6<br>7<br>8<br>9          | Q048 | Where did you have your most recent HIV test?                                 | Private facilities 1<br>Public facilities 2<br>NGO facilities 3<br>NGO outreach workers at community or HTC 4<br>Other (Specify.....) 5<br>Refuse to answer 99                                                  |                |
| 10<br>11<br>12<br>13                               | Q049 | The last time you got tested for HIV, did you receive the result of the test? | No 0<br>Yes 1<br>Refuse to answer 99                                                                                                                                                                            |                |
| 14<br>15<br>16<br>17                               | Q050 | What is your current HIV status? (You could choose not to answer)             | Positive 1<br>Negative 2<br>I don't know my status 3<br>Refuse to answer 99                                                                                                                                     | 2, 3 →<br>Q057 |
| 18<br>19<br>20<br>21<br>22<br>23<br>24<br>25       | Q051 | Are you currently on ART?                                                     | No 0<br>Yes 1<br>I was but discontinued 2<br>I am on treatment for opportunistic infections 3<br>Refuse to answer 99                                                                                            | 0 →<br>Q056    |
| 26<br>27<br>28<br>29                               | Q052 | Do you take ARV regularly as prescribed?                                      | Regularly 1<br>Not regularly 2<br>Refuse to answer 99                                                                                                                                                           |                |
| 30<br>31<br>32<br>33<br>34<br>35<br>36             | Q053 | Where do you get ART services?                                                | Public facilities 1<br>Private facilities 2<br>NGO facilities 3<br>Pharmacy 4<br>Other (Specify.....) 5<br>Refuse to answer 99                                                                                  |                |
| 37<br>38<br>39<br>40<br>41<br>42<br>43<br>44<br>45 | Q054 | If not, why are you not on ART?                                               | Not needed 1<br>Not sure where to go 2<br>I am ashamed to go to health facility 3<br>I am afraid of being discriminated 4<br>I was treated badly in the past 5<br>Other (Specify.....) 6<br>Refuse to answer 99 |                |

**SECTION 5. ALCOHOL AND DRUG USE**

| <b>Measurement of alcohol drinking</b>                                                                                                         |                                                                                                                                                                             |                                                                                                                                                                                        |            |
|------------------------------------------------------------------------------------------------------------------------------------------------|-----------------------------------------------------------------------------------------------------------------------------------------------------------------------------|----------------------------------------------------------------------------------------------------------------------------------------------------------------------------------------|------------|
| One standard measurement:<br>- A can/glass of beer, fermented palm juice (285 ml)<br>- A glass of wine (120 ml)<br>- A glass of whisky (30 ml) |                                                                                                                                                                             |                                                                                                                                                                                        |            |
| No.                                                                                                                                            | Questions and filters                                                                                                                                                       | Coding categories                                                                                                                                                                      | Skip to    |
| Q055                                                                                                                                           | In the past 3 months, how often did you drink at least one can of beer or one glass of any types of wine?                                                                   | Never 1<br>Once a month or less 2<br>2-4 times a month 3<br>2-3 times a week 4<br>4 or more times a week 5<br>Don't know 98<br>Refuse to answer 99                                     | 1→<br>Q064 |
| Q056                                                                                                                                           | In the past 3 months, how many standard drinks containing alcohol (a can of beer or a glass of any types of wine) did you have on a typical day on which you drank alcohol? | 1 - 2 1<br>3 - 4 2<br>5 - 6 3<br>7 - 9 4<br>10 or more 5<br>Don't know 98<br>Refuse to answer 99                                                                                       |            |
| Q057                                                                                                                                           | In the past 3 months, how often did you have more than 5 drinks in one day or night?                                                                                        | Never 1<br>Less than once a month 2<br>Once a month 3<br>1, 2, or 3 times a week 4<br>4 or more times a week 5<br>Don't know 98<br>Refuse to answer 99                                 |            |
| Q058                                                                                                                                           | In the past 3 months, how often have you got drunk from alcohol?                                                                                                            | Never 1<br>Less than once a month 2<br>Once a month 3<br>Every week (1-3 times/week) 4<br>Every day/almost every day(4 or more times a week) 5<br>Don't know 98<br>Refuse to answer 99 |            |



|      |                                                                                                                          |                                            |     |    |
|------|--------------------------------------------------------------------------------------------------------------------------|--------------------------------------------|-----|----|
| Q059 | In the past 12 months, have you tried any of the following drugs? (Ask one by one - CIRCLE YES OR NO) [Multiple answers] |                                            |     |    |
|      |                                                                                                                          | Types of drug                              | Yes | No |
|      | 1                                                                                                                        | Marijuana                                  | 1   | 0  |
|      | 2                                                                                                                        | Heroin/Opium                               | 1   | 0  |
|      | 3                                                                                                                        | Yama (amphetamine)                         | 1   | 0  |
|      | 4                                                                                                                        | Crystal, Ice (Methamphetamine)             | 1   | 0  |
|      | 5                                                                                                                        | Ecstasy                                    | 1   | 0  |
|      | 6                                                                                                                        | Inhalants (glue, paint, petrol, spray can) | 1   | 0  |
|      | 7                                                                                                                        | Other                                      | 1   | 0  |
| Q060 | In the past 3 months, did you inject any illicit drugs?                                                                  |                                            |     |    |
|      |                                                                                                                          | Heroin                                     | 1   |    |
|      |                                                                                                                          | Yama                                       | 2   |    |
|      |                                                                                                                          | Crystal, Ice (Methamphetamine)             | 3   |    |
|      |                                                                                                                          | Never injected any drug                    | 4   |    |
|      | Refuse to answer                                                                                                         | 99                                         |     |    |
| Q061 | In the past 3 months, did you have sex during/after using illicit drugs?                                                 |                                            |     |    |
|      |                                                                                                                          | Heroin                                     | 1   |    |
|      |                                                                                                                          | Yama                                       | 2   |    |
|      |                                                                                                                          | Ice, Amphetamine                           | 3   |    |
|      |                                                                                                                          | Never used drug before having sex          | 4   |    |
|      | Refuse to answer                                                                                                         | 99                                         |     |    |

| SECTION 9. EXPOSURE TO INTERVENTION PROGRAMS |                                                                                       |                                                                                                                                                                                                  |         |
|----------------------------------------------|---------------------------------------------------------------------------------------|--------------------------------------------------------------------------------------------------------------------------------------------------------------------------------------------------|---------|
| No.                                          | Questions and filters                                                                 | Coding categories                                                                                                                                                                                | Skip to |
| Q062                                         | In the past 3 months, have you been reached by NGO staff delivering HIV services?     | No 0<br>Yes 1<br>Don't know 98<br>Refuse to answer 99                                                                                                                                            |         |
| Q063                                         | In the past 3 months, what kind of services have you received (Check all that apply). | HIV/health education and/or materials 1<br>Condoms 2<br>Lubricants 3<br>VCCT/STI testing 4<br>Law support services 5<br>Other health services 6<br>Other (Specify.....) 7<br>Refuse to answer 99 |         |
| Q064                                         | Do you have UIC card?                                                                 | Yes 1<br>No 0                                                                                                                                                                                    |         |

|      |                                                                                               |                                                                                            |                     |
|------|-----------------------------------------------------------------------------------------------|--------------------------------------------------------------------------------------------|---------------------|
|      |                                                                                               | Refuse to answer 99                                                                        |                     |
| Q065 | In the past 12 months, how often did you visit MStyle/Srey Sros club(s)?                      | ... times<br>Refuse to answer 99                                                           |                     |
| Q066 | Have you used online services developed for people like you (e.g. Facebook, website)?         | No 0<br>Yes 1<br>Refuse to answer 99                                                       | 0 -> stop interview |
| Q067 | Have you found any sexual partner on an Internet website or any online program?               | Never 0<br>Yes, always 1<br>Yes, sometimes 2<br>Yes, occasionally 3<br>Refuse to answer 99 |                     |
| Q068 | Have you accessed MStyle website in the past 6 months? (Attach the picture of MStyle webpage) | Never 0<br>Yes, always 1<br>Yes, sometimes 2<br>Yes, occasionally 3<br>Refuse to answer 99 |                     |

["Thank you very much for answering these questions. Let us repeat that your answers are totally confidential and there is no way anyone will learn what you told us.]

STROBE Statement—Checklist of items that should be included in reports of *cross-sectional studies*

|                              | Item No | Recommendation                                                                                                                                                                                                                                                                                                                                                                                                                                                                                                               |
|------------------------------|---------|------------------------------------------------------------------------------------------------------------------------------------------------------------------------------------------------------------------------------------------------------------------------------------------------------------------------------------------------------------------------------------------------------------------------------------------------------------------------------------------------------------------------------|
| <b>Title and abstract</b>    | 1       | (a) Indicate the study's design with a commonly used term in the title or the abstract <a href="#">Confirmed (Lines 1-53)</a><br>(b) Provide in the abstract an informative and balanced summary of what was done and what was found. <a href="#">Confirmed (Lines 30-53)</a>                                                                                                                                                                                                                                                |
| <b>Introduction</b>          |         |                                                                                                                                                                                                                                                                                                                                                                                                                                                                                                                              |
| Background/rationale         | 2       | Explain the scientific background and rationale for the investigation being reported. <a href="#">Confirmed (Lines 75-122)</a>                                                                                                                                                                                                                                                                                                                                                                                               |
| Objectives                   | 3       | State specific objectives, including any prespecified hypotheses. <a href="#">Confirmed (Lines 123-126)</a>                                                                                                                                                                                                                                                                                                                                                                                                                  |
| <b>Methods</b>               |         |                                                                                                                                                                                                                                                                                                                                                                                                                                                                                                                              |
| Study design                 | 4       | Present key elements of study design early in the paper. <a href="#">Confirmed (Line 128-135)</a>                                                                                                                                                                                                                                                                                                                                                                                                                            |
| Setting                      | 5       | Describe the setting, locations, and relevant dates, including periods of recruitment, exposure, follow-up, and data collection. <a href="#">Confirmed (Line 128-135)</a>                                                                                                                                                                                                                                                                                                                                                    |
| Participants                 | 6       | (a) Give the eligibility criteria, and the sources and methods of selection of participants. <a href="#">Confirmed (Lines 137-186)</a>                                                                                                                                                                                                                                                                                                                                                                                       |
| Variables                    | 7       | Clearly define all outcomes, exposures, predictors, potential confounders, and effect modifiers. Give diagnostic criteria, if applicable. <a href="#">Confirmed (Lines 195-228)</a>                                                                                                                                                                                                                                                                                                                                          |
| Data sources/<br>measurement | 8*      | For each variable of interest, give sources of data and details of methods of assessment (measurement). Describe comparability of assessment methods if there is more than one group. <a href="#">Confirmed (Lines 195-228)</a>                                                                                                                                                                                                                                                                                              |
| Bias                         | 9       | Describe any efforts to address potential sources of bias. <a href="#">Confirmed (Lines 188-193)</a>                                                                                                                                                                                                                                                                                                                                                                                                                         |
| Study size                   | 10      | Explain how the study size was arrived at. <a href="#">Confirmed (138-157)</a>                                                                                                                                                                                                                                                                                                                                                                                                                                               |
| Quantitative variables       | 11      | Explain how quantitative variables were handled in the analyses. If applicable, describe which groupings were chosen and why. <a href="#">Confirmed (Lines 231-237)</a>                                                                                                                                                                                                                                                                                                                                                      |
| Statistical methods          | 12      | (a) Describe all statistical methods, including those used to control for confounding. <a href="#">Confirmed (Lines 237-245)</a><br>(b) Describe any methods used to examine subgroups and interactions. <a href="#">(Not applicable)</a><br>(c) Explain how missing data were addressed <a href="#">(Not applicable)</a><br>(d) If applicable, describe analytical methods taking account of sampling strategy. <a href="#">(Not applicable)</a><br>(e) Describe any sensitivity analyses. <a href="#">(Not applicable)</a> |
| <b>Results</b>               |         |                                                                                                                                                                                                                                                                                                                                                                                                                                                                                                                              |
| Participants                 | 13*     | (a) Report numbers of individuals at each stage of study—eg numbers potentially eligible, examined for eligibility, confirmed eligible, included in the study, completing follow-up, and analysed. <a href="#">Confirmed (Lines 259-262)</a><br>(b) Give reasons for non-participation at each stage<br>(c) Consider use of a flow diagram                                                                                                                                                                                   |
| Descriptive data             | 14*     | (a) Give characteristics of study participants (eg demographic, clinical, social) and information on exposures and potential confounders. <a href="#">Confirmed (Lines 264-275)</a><br>(b) Indicate number of participants with missing data for each variable of interest. <a href="#">(Not applicable)</a>                                                                                                                                                                                                                 |
| Outcome data                 | 15*     | Report numbers of outcome events or summary measures. <a href="#">Confirmed (259-260)</a>                                                                                                                                                                                                                                                                                                                                                                                                                                    |
| Main results                 | 16      | (a) Give unadjusted estimates and, if applicable, confounder-adjusted estimates and                                                                                                                                                                                                                                                                                                                                                                                                                                          |

their precision (eg, 95% confidence interval). Make clear which confounders were adjusted for and why they were included. [Confirmed \(276-289, 309-313, 329-334, 347-351\)](#)

(b) Report category boundaries when continuous variables were categorized. [\(Not applicable\)](#)

(c) If relevant, consider translating estimates of relative risk into absolute risk for a meaningful time period. [\(Not applicable\)](#)

|                          |    |                                                                                                                                                                                                                       |
|--------------------------|----|-----------------------------------------------------------------------------------------------------------------------------------------------------------------------------------------------------------------------|
| Other analyses           | 17 | Report other analyses done—eg analyses of subgroups and interactions, and sensitivity analyses. <a href="#">Confirmed (320-325)</a>                                                                                   |
| <b>Discussion</b>        |    |                                                                                                                                                                                                                       |
| Key results              | 18 | Summarise key results with reference to study objectives. <a href="#">Confirmed (Lines 381-493)</a>                                                                                                                   |
| Limitations              | 19 | Discuss limitations of the study, taking into account sources of potential bias or imprecision. Discuss both direction and magnitude of any potential bias. <a href="#">Confirmed (Lines 495-510)</a>                 |
| Interpretation           | 20 | Give a cautious overall interpretation of results considering objectives, limitations, multiplicity of analyses, results from similar studies, and other relevant evidence. <a href="#">Confirmed (Lines 513-519)</a> |
| Generalisability         | 21 | Discuss the generalisability (external validity) of the study results. <a href="#">Confirmed (Lines 496-502)</a>                                                                                                      |
| <b>Other information</b> |    |                                                                                                                                                                                                                       |
| Funding                  | 22 | Give the source of funding and the role of the funders for the present study and, if applicable, for the original study on which the present article is based. <a href="#">Confirmed (Lines 535-537)</a>              |

\*Give information separately for exposed and unexposed groups.

**Note:** An Explanation and Elaboration article discusses each checklist item and gives methodological background and published examples of transparent reporting. The STROBE checklist is best used in conjunction with this article (freely available on the Web sites of PLoS Medicine at <http://www.plosmedicine.org/>, Annals of Internal Medicine at <http://www.annals.org/>, and Epidemiology at <http://www.epidem.com/>). Information on the STROBE Initiative is available at [www.strobe-statement.org](http://www.strobe-statement.org).
