# Supplementary material for: HIV prevalence and factors associated with HIV infection among transgender women in Cambodia: results from a national Integrated Biological and Behavioral Survey
Source: PubMed Central journal article supplement — BMJ Open. 2017 Aug 11;7(8):e015390. doi: 10.1136/bmjopen-2016-015390 (PMC5724216; doi:10.1136/bmjopen-2016-015390), 2017-08-11
Supplement: bmjopen-2016-015390supp001.pdf [file bmjopen-2016-015390supp001.pdf]

Participant ID Code: .....

### Integrated Biological and Behavioral Survey of Transgender Women in Cambodia, 2016

Date of interview: day.....month.....year.....

Province/City:

- |                     |                     |                  |
|---------------------|---------------------|------------------|
| 1. Phnom Pehn       | 6. Preah Sihanouk   | 11. Kandal       |
| 2. Kampong Cham     | 7. Prey Veng        | 12. Koh Kong     |
| 3. Battambang       | 8. Svay Rieng       | 13. Thbong Khmum |
| 4. Siem Reap        | 9. Kampong Spue     |                  |
| 5. Banteay Meanchey | 10. Kampong Chhnang |                  |

Interview Location (City/NGOs): .....

Name of administrative districts (current residence): .....

Status of administrative districts:

- 1- Urban
- 2- Rural

| SECTION 1: SOCIODEMOGRAPHIC CHARACTERISTICS                                             |                                                             |                                                                                                                                                                                                                                                                               |         |
|-----------------------------------------------------------------------------------------|-------------------------------------------------------------|-------------------------------------------------------------------------------------------------------------------------------------------------------------------------------------------------------------------------------------------------------------------------------|---------|
| No.                                                                                     | Questions and filters                                       | Coding categories                                                                                                                                                                                                                                                             | Skip to |
| <b>Now I would like to ask you some questions related to your personal information.</b> |                                                             |                                                                                                                                                                                                                                                                               |         |
| Q001                                                                                    | How old are you?                                            | Age in completed years:<br>.....                                                                                                                                                                                                                                              |         |
| Q002                                                                                    | What is your current marital status?<br>(only one response) | Married and living together 1<br>Married ,but not living together 2<br>Widowed, Divorced or separated 3<br>Not married, not living with any partner 4<br>Not married, living with sweetheart (female) 5<br>Not married but living with male lover 6<br>Other (Specify.....) 7 |         |
| Q003                                                                                    | For how long have you been living in the current city?      | .....Years<br><u>Record 0</u> if not living in this city<br><u>Record 1</u> if living in this city 1 year or less<br>Refuse to answer 99                                                                                                                                      |         |
| Q004                                                                                    | In the past 6 months, on average, how much money            | Amount of money (in US\$): .....<br>Refuse to answer 99                                                                                                                                                                                                                       |         |

|      |                                                                                                                                                                                                |                                                                                                                                                                                                                                                                                                              |                                                                   |
|------|------------------------------------------------------------------------------------------------------------------------------------------------------------------------------------------------|--------------------------------------------------------------------------------------------------------------------------------------------------------------------------------------------------------------------------------------------------------------------------------------------------------------|-------------------------------------------------------------------|
|      | did you make per month?<br>(exchange rate: 4000 riel per<br>1 US\$)                                                                                                                            |                                                                                                                                                                                                                                                                                                              |                                                                   |
| Q005 | How many years of formal<br>education have you<br>completed?                                                                                                                                   | Number of years: .....                                                                                                                                                                                                                                                                                       | <u>Record 0</u> if never attending school.<br>Refuse to answer 99 |
| Q006 | What is your current job<br>(main source of income)?<br><br>(only one response)<br><br><i>Note: If you are both studying<br/>and having a paid job, report<br/>your main source of income.</i> | Unemployed 0<br>Hair dresser/Beautician 1<br>Government officer 2<br>Laborer (factory, construction work) 3<br>Seller 4<br>Entertainment Worker (bar, karaoke, etc.) 5<br>Sex worker 6<br>Student 7<br>NGO staff 8<br>Private company staff 9<br>Farmer/fisherman 10<br>Artist 11<br>Other (Specify.....) 12 |                                                                   |

| <b>SECTION 2. TRANSGENDER IDENTITY &amp; EXPERIENCES</b> |                                                                                                                       |                                                                                            |            |
|----------------------------------------------------------|-----------------------------------------------------------------------------------------------------------------------|--------------------------------------------------------------------------------------------|------------|
| Q007                                                     | What gender do you consider<br>yourself?                                                                              | Female 1<br>Male 2<br>Third gender 3<br>Uncertain 4<br>Refuse to answer 99                 |            |
| Q008                                                     | How often do you express or<br>dress yourself as a woman?                                                             | All the time 1<br>Often 2<br>Sometimes 3<br>Rarely 4<br>Refuse to answer 99                |            |
| Q009                                                     | How many friends in your<br>social network are also<br>transgender?                                                   | Number: .....                                                                              |            |
| Q010                                                     | Have you ever taken<br>hormones or any substances<br>for beauty purposes?                                             | No 1<br>Yes 2<br>Refuse to answer 99                                                       | 2→<br>Q014 |
| Q011                                                     | What are the methods you<br>have used to take hormones<br>or any substances for beauty<br>purposes? [multiple answer] | Pills 1<br>Injections 2<br>Skin patches 3<br>Other (Specify.....) 4<br>Refuse to answer 99 |            |
| Q012                                                     | If you have taken hormones<br>or any substances for beauty                                                            | Never injected 0<br>Injected by myself 1                                                   |            |

|      |                                                                                              |                                                                                                                  |  |
|------|----------------------------------------------------------------------------------------------|------------------------------------------------------------------------------------------------------------------|--|
|      | purposes by injection, how have you received it?                                             | Injected by skilled personnel (beauty clinic) 2<br>Injected by non-skilled personnel 3<br>Other (Specify.....) 4 |  |
| Q013 | If you have injected hormones or any substances for beauty purposes, have you shared needle? | Never injected 0<br>No 1<br>Yes 2<br>Refuse to answer 99                                                         |  |
| Q014 | Have you ever had any operation to change any parts of your body to become a woman?          | No 1<br>Yes 2<br>Refuse to answer 99                                                                             |  |

| <b>Section 3. SEXUAL PARTNERS AND SEXUAL HISTORY</b>                                                                  |                                                                                                                          |                                                                                   |                    |
|-----------------------------------------------------------------------------------------------------------------------|--------------------------------------------------------------------------------------------------------------------------|-----------------------------------------------------------------------------------|--------------------|
| <b>No.</b>                                                                                                            | <b>Questions and filters</b>                                                                                             | <b>Coding categories</b>                                                          | <b>Skip to</b>     |
| <b>Now I would like to ask questions about your recent sexual relationship with various kinds of sexual partners.</b> |                                                                                                                          |                                                                                   |                    |
| Q015                                                                                                                  | Have you ever had sex with any partner in your life time? [Including vaginal, or anal sex]                               | No 0<br>Yes 1<br>Refuse to answer 99                                              |                    |
| Q016                                                                                                                  | How likely do you think you are infected with HIV?                                                                       | Very Likely 1<br>Likely 2<br>Unlikely 3<br>Very Unlikely 4<br>Refuse to answer 99 |                    |
| <b>Sex with women</b>                                                                                                 |                                                                                                                          |                                                                                   |                    |
| Q017                                                                                                                  | Have you ever had sex with a woman? [Including vaginal or anal sex]                                                      | No 0<br>Yes 1<br>Refuse to answer 99                                              | 0, 99<br>→<br>Q028 |
| Q018                                                                                                                  | In the past 12 months, have you had sex with a woman? [Including vaginal or anal sex]                                    | No 0<br>Yes 1<br>Refuse to answer 99                                              | 0, 99<br>→<br>Q028 |
| Q019                                                                                                                  | In the past 12 months, have you had sex with a woman not in exchange for money or gifts? [Including vaginal or anal sex] | No 0<br>Yes 1<br>Refuse to answer 99                                              | 0→<br>Q022         |
| Q020                                                                                                                  | In the past 3 month, how many women did you have                                                                         | Number of women:<br>.....                                                         |                    |

|      |                                                                                                                                                                             |                                                                                                                                                                                                                                                                                          |               |
|------|-----------------------------------------------------------------------------------------------------------------------------------------------------------------------------|------------------------------------------------------------------------------------------------------------------------------------------------------------------------------------------------------------------------------------------------------------------------------------------|---------------|
|      | sex with not in exchange for money or gifts?                                                                                                                                | Refuse to answer 99                                                                                                                                                                                                                                                                      |               |
| Q021 | In the past 3 month, how often did you use a condom when you had vaginal or anal sex with women not in exchange for money or gifts?                                         | Never had sex with a woman 0<br>Always 1<br>Often 2<br>Sometimes 3<br>Never 4<br>Refuse to answer 99                                                                                                                                                                                     | 0, 1→<br>Q024 |
| Q022 | In the past 3 month, if you did not always use a condom when you had sex with women not in exchange for money or gifts?<br>What were the reasons?<br><br>[Multiple Answers] | We are in a relationship 1<br>She is not HIV/STI infected 2<br>Too high to use a condom 3<br>No condom available 4<br>Feel better without a condom 5<br>I am HIV-infected 6<br>I penetrated, so I am not at risk 7<br>Partner refused 8<br>Other (Specify.....) 9<br>Refuse to answer 99 |               |
| Q023 | In the past 12 months, have you had sex with a woman in exchange for money or gifts? [Including vaginal or anal sex]                                                        | No 0<br>Yes 1<br>Refuse to answer 99                                                                                                                                                                                                                                                     | 0→<br>Q028    |
| Q024 | In the past 3 months, how many women did you have sex with in exchange for money or gifts?<br>[Including vaginal or anal sex]                                               | Number of women:<br>.....<br><br>Refuse to answer 99                                                                                                                                                                                                                                     |               |
| Q025 | Where did you meet women with whom you had sex with in exchange for money or gifts??                                                                                        | Park 1<br>Street 2<br>Bar/discotheque/cafe 3<br>Beer Garden/Restaurant 4<br>Massage Parlor 5<br>Karaoke 6<br>Online (Facebook, Line, Website) 7<br>Guesthouse/hotel 8<br>Workplace/school 9<br>Other (Specify.....) 10                                                                   |               |
| Q026 | In the past 12 months, how often did you use a condom when you had vaginal or anal sex with women in exchange for money or gifts?                                           | Never had sex 0<br>Always 1<br>Often 2<br>Sometimes 3<br>Never 4<br>Refuse to answer 99                                                                                                                                                                                                  |               |

|      |                                                                                                                                                                              |                                                                                                                                                                                                                                                                                          |  |
|------|------------------------------------------------------------------------------------------------------------------------------------------------------------------------------|------------------------------------------------------------------------------------------------------------------------------------------------------------------------------------------------------------------------------------------------------------------------------------------|--|
| Q027 | In the past 3 months, if you did not always use a condom when you had sex with women not in exchange for money or gifts?<br>What were the reasons?<br><br>[Multiple Answers] | We are in a relationship 1<br>She is not HIV/STI infected 2<br>Too high to use a condom 3<br>No condom available 4<br>Feel better without a condom 5<br>I am HIV-infected 6<br>I penetrated, so I am not at risk 7<br>Partner refused 8<br>Other (Specify.....) 9<br>Refuse to answer 99 |  |
|------|------------------------------------------------------------------------------------------------------------------------------------------------------------------------------|------------------------------------------------------------------------------------------------------------------------------------------------------------------------------------------------------------------------------------------------------------------------------------------|--|

| Sex with men |                                                                                                                          |                                                                                                                                                                                                                                                                                                       |                   |
|--------------|--------------------------------------------------------------------------------------------------------------------------|-------------------------------------------------------------------------------------------------------------------------------------------------------------------------------------------------------------------------------------------------------------------------------------------------------|-------------------|
| Q028         | Have you ever had anal sex with a man?                                                                                   | No 0<br>Yes 1<br>Refuse to answer 99                                                                                                                                                                                                                                                                  | 0,<br>99→<br>Q042 |
| Q029         | In the past 12 months, have you had anal sex with a man?                                                                 | No 0<br>Yes 1<br>Refuse to answer 99                                                                                                                                                                                                                                                                  | 0,<br>99→<br>Q042 |
| Q030         | In the past 12 months, what was your usual role in anal sex with a man?                                                  | Insertive 1<br>Receptive 2<br>Both 3<br>Refuse to answer 99                                                                                                                                                                                                                                           |                   |
| Q031         | In the past 3 months, have you had sex with men not in exchange for money or gifts?                                      | No 0<br>Yes 1<br>Refuse to answer 99                                                                                                                                                                                                                                                                  | 0→<br>Q033        |
| Q032         | In the past 3 months, how many men you had sex with not in exchange for money or gifts?                                  | Number of men: .....<br>Refuse to answer 99                                                                                                                                                                                                                                                           |                   |
| Q033         | In the past 12 months, how often did you use a condom when you had anal sex with men not in exchange for money or gifts? | Never had sex 0<br>Always 1<br>Often 2<br>Sometimes 3<br>Never 4<br>Refuse to answer 99                                                                                                                                                                                                               | 0, 1→<br>Q035     |
| Q034         | If not always, why not?<br><br>[Multiple Answers]                                                                        | We are in a relationship 1<br>He is not HIV/STI infected 2<br>I was too drunk or too high with drugs 3<br>No condom available 4<br>Feel better without a condom 5<br>I am HIV-infected 6<br>I penetrated, so I am not at risk 7<br>Partner refused 8<br>Other (Specify.....) 9<br>Refuse to answer 99 |                   |

|      |                                                                                                        |                                                                                                                                                                                                                                                                                                    |               |
|------|--------------------------------------------------------------------------------------------------------|----------------------------------------------------------------------------------------------------------------------------------------------------------------------------------------------------------------------------------------------------------------------------------------------------|---------------|
| Q035 | In the past 12 months, have you had sex with men in exchange for money or gifts?                       | No 0<br>Yes 1<br>Refuse to answer 99                                                                                                                                                                                                                                                               | 0→<br>Q040    |
| Q036 | In the past 3 month, how many men you had sex with in exchange for money or gifts?                     | Number of men:<br>.....<br>Refuse to answer 99                                                                                                                                                                                                                                                     |               |
| Q037 | Where did you meet the men you had sex with in exchange for money or gifts?                            | Park 1<br>Street 2<br>Bar/discotheque/cafe 3<br>Beer Garden/Restaurant 4<br>Massage Parlor 5<br>Karaoke 6<br>Online (Facebook, Line, Website) 7<br>Guesthouse/hotel 8<br>Workplace/School 9<br>Other (Specify.....) 10                                                                             |               |
| Q038 | In the past 12 months, how often did you use a condom when you had anal sex with men you paid for sex? | Never had anal sex 0<br>Always 1<br>Often 2<br>Sometimes 3<br>Never 4<br>Refuse to answer 99                                                                                                                                                                                                       | 0, 1→<br>Q615 |
| Q039 | If not always, why not?<br><br>[Multiple Answers]                                                      | We are in a relationship 1<br>He is not HIV/STI infected 2<br>I was drunk or too high with drugs 3<br>No condom available 4<br>Feel better without a condom 5<br>I am HIV-infected 6<br>I penetrated, so I am not at risk 7<br>Partner refused 8<br>Other (Specify.....) 10<br>Refuse to answer 99 |               |

| Access to condoms and lubricant |                                                                              |                                                                                                                                                                                                        |         |
|---------------------------------|------------------------------------------------------------------------------|--------------------------------------------------------------------------------------------------------------------------------------------------------------------------------------------------------|---------|
| No.                             | Questions and filters                                                        | Coding categories                                                                                                                                                                                      | Skip to |
| Q040                            | In this last 12 months, where did you get condoms?<br><br>[Multiple Answers] | Friends/outreach workers 1<br>Condom peer sale representative 2<br>Pharmacy/drug store/clinic 3<br>Condom outlets 4<br>Mart/mini-mart 5<br>Groceries 6<br>Hotel/guesthouse 7<br>Other (Specify.....) 8 |         |

|      |                                                                                |                                                                                                                                                                                                                               |  |
|------|--------------------------------------------------------------------------------|-------------------------------------------------------------------------------------------------------------------------------------------------------------------------------------------------------------------------------|--|
|      |                                                                                | Refuse to answer 99                                                                                                                                                                                                           |  |
| Q041 | In this last 12 months, where did you get lubricant?<br><br>[Multiple Answers] | Friends/outreach workers 1<br>Condom peer sale representative 2<br>Pharmacy/drug store/clinic 3<br>Condom outlets 4<br>Mart/mini-mart 5<br>Groceries 6<br>Hotel/guesthouse 7<br>Other (Specify.....) 8<br>Refuse to answer 99 |  |

| SECTION 4. STI AND HIV TESTING |                                                                                                                          |                                                                                                                                                                                                                            |            |
|--------------------------------|--------------------------------------------------------------------------------------------------------------------------|----------------------------------------------------------------------------------------------------------------------------------------------------------------------------------------------------------------------------|------------|
| No.                            | Questions and filters                                                                                                    | Coding categories                                                                                                                                                                                                          | Skip to    |
| Q042                           | In the past 12 months, have you experienced the following symptoms?<br><br>[Multiple Answers]                            | Cuts or sores in the genital area 1<br>Swelling in the genital area 2<br>Abnormal urethral discharge 3<br>Symptoms on the anus 4<br>Symptom in the mouth/throat 5<br>Refuse to answer 99                                   |            |
| Q043                           | Where did you first go for treatment the last time you had any above-mentioned symptoms?<br><br>(Only one response)      | Never had any symptoms 0<br>Pharmacy 1<br>Private clinic/hospital 2<br>Public Hospital/STD clinic 3<br>NGO Clinic/hospital 4<br>Traditional doctor 5<br>Didn't get care 6<br>Other (Specify.....) 7<br>Refuse to answer 99 |            |
| Q044                           | Have you ever been tested for HIV?                                                                                       | No 0<br>Yes 1<br>Refuse to answer 99                                                                                                                                                                                       | 0→<br>Q049 |
| Q045                           | In past 6 months, have you been tested for HIV?                                                                          | No 0<br>Yes 1<br>Refuse to answer 99                                                                                                                                                                                       |            |
| Q046                           | How long has it been since you received the last HIV test?                                                               | Number of months.....                                                                                                                                                                                                      |            |
| Q047                           | If a rapid self-test kit for HIV was available and you could get the result within 20 minutes at home, would you use it? | No 0<br>Yes 1<br>Refuse to answer 99                                                                                                                                                                                       |            |

|      |                                                                               |                                                                                                                                                                                                                 |                |
|------|-------------------------------------------------------------------------------|-----------------------------------------------------------------------------------------------------------------------------------------------------------------------------------------------------------------|----------------|
| Q048 | Where did you have your most recent HIV test?                                 | Private facilities 1<br>Public facilities 2<br>NGO facilities 3<br>NGO outreach workers at community or HTC 4<br>Other (Specify.....) 5<br>Refuse to answer 99                                                  |                |
| Q049 | The last time you got tested for HIV, did you receive the result of the test? | No 0<br>Yes 1<br>Refuse to answer 99                                                                                                                                                                            |                |
| Q050 | What is your current HIV status? (You could choose not to answer)             | Positive 1<br>Negative 2<br>I don't know my status 3<br>Refuse to answer 99                                                                                                                                     | 2, 3 →<br>Q057 |
| Q051 | Are you currently on ART?                                                     | No 0<br>Yes 1<br>I was but discontinued 2<br>I am on treatment for opportunistic infections 3<br>Refuse to answer 99                                                                                            | 0 →<br>Q056    |
| Q052 | Do you take ARV regularly as prescribed?                                      | Regularly 1<br>Not regularly 2<br>Refuse to answer 99                                                                                                                                                           |                |
| Q053 | Where do you get ART services?                                                | Public facilities 1<br>Private facilities 2<br>NGO facilities 3<br>Pharmacy 4<br>Other (Specify.....) 5<br>Refuse to answer 99                                                                                  |                |
| Q054 | If not, why are you not on ART?                                               | Not needed 1<br>Not sure where to go 2<br>I am ashamed to go to health facility 3<br>I am afraid of being discriminated 4<br>I was treated badly in the past 5<br>Other (Specify.....) 6<br>Refuse to answer 99 |                |

**SECTION 5. ALCOHOL AND DRUG USE**



### Measurement of alcohol drinking

One standard measurement:

- A can/glass of beer, fermented palm juice (285 ml)
- A glass of wine (120 ml)
- A glass of whisky (30 ml)

| No.  | Questions and filters                                                                                                                                                       | Coding categories                                                                                                                                                                      | Skip to    |
|------|-----------------------------------------------------------------------------------------------------------------------------------------------------------------------------|----------------------------------------------------------------------------------------------------------------------------------------------------------------------------------------|------------|
| Q055 | In the past 3 months, how often did you drink at least one can of beer or one glass of any types of wine?                                                                   | Never 1<br>Once a month or less 2<br>2-4 times a month 3<br>2-3 times a week 4<br>4 or more times a week 5<br>Don't know 98<br>Refuse to answer 99                                     | 1→<br>Q064 |
| Q056 | In the past 3 months, how many standard drinks containing alcohol (a can of beer or a glass of any types of wine) did you have on a typical day on which you drank alcohol? | 1 - 2 1<br>3 - 4 2<br>5 - 6 3<br>7 - 9 4<br>10 or more 5<br>Don't know 98<br>Refuse to answer 99                                                                                       |            |
| Q057 | In the past 3 months, how often did you have more than 5 drinks in one day or night?                                                                                        | Never 1<br>Less than once a month 2<br>Once a month 3<br>1, 2, or 3 times a week 4<br>4 or more times a week 5<br>Don't know 98<br>Refuse to answer 99                                 |            |
| Q058 | In the past 3 months, how often have you got drunk from alcohol?                                                                                                            | Never 1<br>Less than once a month 2<br>Once a month 3<br>Every week (1-3 times/week) 4<br>Every day/almost every day(4 or more times a week) 5<br>Don't know 98<br>Refuse to answer 99 |            |

|      |                                                                                                                          |                                            |                                   |    |
|------|--------------------------------------------------------------------------------------------------------------------------|--------------------------------------------|-----------------------------------|----|
| Q059 | In the past 12 months, have you tried any of the following drugs? (Ask one by one – CIRCLE YES OR NO) [Multiple answers] |                                            |                                   |    |
|      |                                                                                                                          | Types of drug                              | Yes                               | No |
|      | 1                                                                                                                        | Marijuana                                  | 1                                 | 0  |
|      | 2                                                                                                                        | Heroin/Opium                               | 1                                 | 0  |
|      | 3                                                                                                                        | Yama (amphetamine)                         | 1                                 | 0  |
|      | 4                                                                                                                        | Crystal, Ice (Methamphetamine)             | 1                                 | 0  |
|      | 5                                                                                                                        | Ecstasy                                    | 1                                 | 0  |
|      | 6                                                                                                                        | Inhalants (glue, paint, petrol, spray can) | 1                                 | 0  |
|      | 7                                                                                                                        | Other                                      | 1                                 | 0  |
| Q060 | In the past 3 months, did you inject any illicit drugs?                                                                  |                                            |                                   |    |
|      |                                                                                                                          |                                            | Heroin                            | 1  |
|      |                                                                                                                          |                                            | Yama                              | 2  |
|      |                                                                                                                          |                                            | Crystal, Ice (Methamphetamine)    | 3  |
|      |                                                                                                                          |                                            | Never injected any drug           | 4  |
|      |                                                                                                                          | Refuse to answer                           | 99                                |    |
| Q061 | In the past 3 months, did you have sex during/after using illicit drugs?                                                 |                                            |                                   |    |
|      |                                                                                                                          |                                            | Heroin                            | 1  |
|      |                                                                                                                          |                                            | Yama                              | 2  |
|      |                                                                                                                          |                                            | Ice, Amphetamine                  | 3  |
|      |                                                                                                                          |                                            | Never used drug before having sex | 4  |
|      |                                                                                                                          | Refuse to answer                           | 99                                |    |

| SECTION 9. EXPOSURE TO INTERVENTION PROGRAMS |                                                                                       |                                                                                                                                                                                                  |         |
|----------------------------------------------|---------------------------------------------------------------------------------------|--------------------------------------------------------------------------------------------------------------------------------------------------------------------------------------------------|---------|
| No.                                          | Questions and filters                                                                 | Coding categories                                                                                                                                                                                | Skip to |
| Q062                                         | In the past 3 months, have you been reached by NGO staff delivering HIV services?     | No 0<br>Yes 1<br>Don't know 98<br>Refuse to answer 99                                                                                                                                            |         |
| Q063                                         | In the past 3 months, what kind of services have you received (Check all that apply). | HIV/health education and/or materials 1<br>Condoms 2<br>Lubricants 3<br>VCCT/STI testing 4<br>Law support services 5<br>Other health services 6<br>Other (Specify.....) 7<br>Refuse to answer 99 |         |
| Q064                                         | Do you have UIC card?                                                                 | Yes 1<br>No 0                                                                                                                                                                                    |         |

|      |                                                                                               |                                                                                            |                     |
|------|-----------------------------------------------------------------------------------------------|--------------------------------------------------------------------------------------------|---------------------|
|      |                                                                                               | Refuse to answer 99                                                                        |                     |
| Q065 | In the past 12 months, how often did you visit MStyle/Srey Sros club(s)?                      | ... times<br>Refuse to answer 99                                                           |                     |
| Q066 | Have you used online services developed for people like you (e.g. Facebook, website)?         | No 0<br>Yes 1<br>Refuse to answer 99                                                       | 0 -> stop interview |
| Q067 | Have you found any sexual partner on an Internet website or any online program?               | Never 0<br>Yes, always 1<br>Yes, sometimes 2<br>Yes, occasionally 3<br>Refuse to answer 99 |                     |
| Q068 | Have you accessed MStyle website in the past 6 months? (Attach the picture of MStyle webpage) | Never 0<br>Yes, always 1<br>Yes, sometimes 2<br>Yes, occasionally 3<br>Refuse to answer 99 |                     |

["Thank you very much for answering these questions. Let us repeat that your answers are totally confidential and there is no way anyone will learn what you told us.]
